# Supplementary material for: tTARGIT AAVs mediate the sensitive and flexible manipulation of intersectional neuronal populations in mice
Source: eLife. 2021 Mar 11;10:e66835. doi: 10.7554/eLife.66835 (PMC8026215; doi:10.7554/eLife.66835)
Supplement: Figure 3—source data 1. [file elife-66835-fig3-data1.xlsx]

## Sheet: BAT
hM3Dq												GFP
Saline												Saline
ID	-10	0	10	20	30	45	60	120				ID	-10	0	10	20	30	45	60	120
X553	35.3	35.7	36.6	36.3	36.3	35.8	35.8	35.2				761	36.2	36.9	37.2	37.3	37.2	36.6	36.5	36.5
762	35	36	37.2	37.1	36.8	36.6	36.9	35.7				779	36	37	37.9	37.8	37.4	37	36.337	35.8
753	36.6	36.9	37.9	37.5	37.8	37.4	37.6	37.1				780	36.1	37.2	37.9	37.5	37.5	37.5	37	36.7
X547	36.3	36.8	37.5	37.2	36.8	37.1	36.8	36				758	35.6	35.8	37	36.5	36.8	36.4	36.4	35.5
X548	36.5	37.4	37.6	37.3	37.1	37	36.5	36.2				842	35.3	36.4	37.6	37.3	37.3	36.6	35.7	35.5
X549	36.8	37.7	38	38	37.7	37.5	37.1	36.4				552	36	36.9	37.7	37.4	37.3	37.1	36.5	36.2
550	36.1	36.2	37.1	36.9	36.7	36.3	36.3	36.2				781	35.5	36.2	37.3	37.1	36.6	36.6	36	35.8
551	36.4	36.6	37.8	37.7	37.7	37.2	37.1	36
												761	-0.7	0	0.3	0.4	0.3	-0.3	-0.4	-0.4
X553	-0.4	0	0.9	0.6	0.6	0.1	0.1	-0.5				779	-1	0	0.9	0.8	0.4	0	-0.663	-1.2
762	-1	0	1.2	1.1	0.8	0.6	0.9	-0.3				780	-1.1	0	0.7	0.3	0.3	0.3	-0.2	-0.5
753	-0.3	0	1	0.6	0.9	0.5	0.7	0.2				758	-0.2	0	1.2	0.7	1	0.6	0.6	-0.3
X547	-0.5	0	0.7	0.4	0	0.3	0	-0.8				842	-1.1	0	1.2	0.9	0.9	0.2	-0.7	-0.9
X548	-0.9	0	0.2	-0.1	-0.3	-0.4	-0.9	-1.2				552	-0.9	0	0.8	0.5	0.4	0.2	-0.4	-0.7
X549	-0.9	0	0.3	0.3	0	-0.2	-0.6	-1.3				781	-0.7	0	1.1	0.9	0.4	0.4	-0.2	-0.4
550	-0.1	0	0.9	0.7	0.5	0.1	0.1	0
551	-0.2	0	1.2	1.1	1.1	0.6	0.5	-0.6
CNO												CNO
ID												ID
X553	35.2	35.8	36.8	36.8	37	36.5	36.1	36				761	36.3	36.7	37.5	37.9	37.8	37.6	37.5	35.8
762	36.3	35.8	37.6	37.8	37.5	36.7	36.8	36.5				779	36.2	37.3	38.2	37.9	37.1	37	36.9	36.1
753	35.6	36.5	37.6	37.7	37.1	37	36.9	36.3				780	35.7	36.6	37.6	37.4	37.1	36.6	36.6	36.5
X547	35.9	36.6	37.5	37.8	37.7	37.8	38	36.6				758	36.5	36.6	37.5	37.4	37.4	36.6	36.4	36.1
X548	36.4	36.2	37	36.9	36.7	36.7	36.8	35.9				842	35.5	36.2	36.6	36.5	36.5	35.8	35.8	35.4
X549	36.3	36.9	38.3	38	38.2	37.9	37.9	37.5				552	36.6	37.3	37.9	37.5	37.5	37.3	37	37.3
550	35.7	36.1	37.2	37.4	37.3	37.2	37.3	35.9				781	35.1	36.1	37.1	36.8	36.8	36.2	35.7	35.5
551	36.1	35.9	37.5	37.5	37.1	36.8	37	36.7
												761	-0.4	0	0.8	1.2	1.1	0.9	0.8	-0.9
X553	-0.6	0	1	1	1.2	0.7	0.3	0.2				779	-1.1	0	0.9	0.6	-0.2	-0.3	-0.4	-1.2
762	0.5	0	1.8	2	1.7	0.9	1	0.7				780	-0.9	0	1	0.8	0.5	0	0	-0.1
753	-0.9	0	1.1	1.2	0.6	0.5	0.4	-0.2				758	-0.1	0	0.9	0.8	0.8	0	-0.2	-0.5
X547	-0.7	0	0.9	1.2	1.1	1.2	1.4	0				842	-0.7	0	0.4	0.3	0.3	-0.4	-0.4	-0.8
X548	0.2	0	0.8	0.7	0.5	0.5	0.6	-0.3				552	-0.7	0	0.6	0.2	0.2	0	-0.3	0
X549	-0.6	0	1.4	1.1	1.3	1	1	0.6				781	-1	0	1	0.7	0.7	0.1	-0.4	-0.6
550	-0.4	0	1.1	1.3	1.2	1.1	1.2	-0.2
551	0.2	0	1.6	1.6	1.2	0.9	1.1	0.8

## Sheet: VO2
Computer	ID#:	310	306	307	798	308	309	312	NT
Date/Clock	BW (g) in:	27.1	30.5	27	24.7	21.4	23	21.8	19.7
Time	BW (g) out:	25.9	27.3	25.4	23	20.5	22.2	20.9	20.6
2019-09-15	17:02:26	3274	3116	2379	2803	3376	4091	2829	2422
2019-09-15	17:22:26	2905	3063	3057	3635	2814	3394	1768	2530
2019-09-15	17:42:26	2648	3098	2135	1893	2431	3248	2195	4216
2019-09-15	18:02:26	2203	1651	2092	4519	2294	1885	2233	2389
2019-09-15	18:22:26	2210	1647	3145	3553	3757	1829	4028	2505
2019-09-15	18:42:26	1659	1873	2966	3734	2187	3271	4126	2447
2019-09-15	19:02:26	2482	3590	1820	3559	2375	3311	3992	4185
2019-09-15	19:22:26	3534	1863	3212	3084	3772	2059	3854	2114
2019-09-15	19:42:26	3454	3071	3161	4045	3643	2704	3558	4089
2019-09-15	20:02:26	3474	2956	3160	3133	3624	3639	3363	4087
2019-09-15	20:22:26	3591	3084	2846	4079	2917	3755	3874	4013
2019-09-15	20:42:26	3170	2819	2916	3189	3006	3436	3530	3297
2019-09-15	21:02:26	3273	3329	1722	3025	3415	3517	3169	3604
2019-09-15	21:22:26	3168	1922	2765	2717	2653	3118	3397	2487
2019-09-15	21:42:26	2840	2395	3324	4286	3198	2317	2322	2393
2019-09-15	22:02:26	2956	3359	2257	3128	3231	1992	3996	3542
2019-09-15	22:22:26	2856	3003	2919	2037	2558	3586	3942	4236
2019-09-15	22:42:26	2149	3162	3358	3005	2361	3450	2948	4114
2019-09-15	23:02:26	2562	3181	2944	3414	3383	3369	3566	3960
2019-09-15	23:22:26	2717	1955	3132	2813	2662	2664	3485	2885
2019-09-15	23:42:26	2976	1650	2824	2665	3505	3274	3006	4354
2019-09-16	1900-01-01 00:02:26	2090	1262	1761	1949	3015	3648	3329	4132
2019-09-16	1900-01-01 00:22:26	2528	3648	2452	2505	2109	3235	3280	3914
2019-09-16	1900-01-01 00:42:26	3025	3561	3406	1994	3328	2277	3012	3380
2019-09-16	1900-01-01 01:02:26	3145	3451	2405	3477	3005	3365	3530	3427
2019-09-16	1900-01-01 01:22:26	2677	3168	2787	2037	3589	3319	2097	2265
2019-09-16	1900-01-01 01:42:26	3088	2587	2134	2579	2366	3302	2160	2501
2019-09-16	1900-01-01 02:02:26	2150	2535	2667	3141	3357	2674	4029	2007
2019-09-16	1900-01-01 02:22:26	1896	2359	2783	2381	2469	2416	3536	3861
2019-09-16	1900-01-01 02:42:26	2788	1393	1805	3573	3610	2285	3721	4034
2019-09-16	1900-01-01 03:02:26	2301	1198	1751	2303	2801	3326	2806	3511
2019-09-16	1900-01-01 03:22:26	2409	1378	1884	2109	2206	3372	3545	3955
2019-09-16	1900-01-01 03:42:26	2776	3422	3064	2250	2088	3230	2738	2770
2019-09-16	1900-01-01 04:02:26	3362	3387	2216	2176	3505	2765	2823	2890
2019-09-16	1900-01-01 04:22:26	2292	1778	3168	2492	3059	2496	2664	2269
2019-09-16	1900-01-01 04:42:26	1906	3156	3150	2692	2618	2377	3924	2067
2019-09-16	1900-01-01 05:02:26	1838	3042	2690	2096	2167	3139	3399	4458
2019-09-16	1900-01-01 05:22:26	3207	2039	2093	2790	2920	3371	2479	2756
2019-09-16	1900-01-01 05:42:26	3040	1422	2329	4020	2113	2513	3564	2479
2019-09-16	1900-01-01 06:02:26	2078	1996	2633	2676	2125	3196	2602	2049
2019-09-16	1900-01-01 06:22:26	2679	2515	2982	2827	1972	2219	2516	2860
2019-09-16	1900-01-01 06:42:26	1977	2016	1944	2626	2063	2193	2259	2697
2019-09-16	1900-01-01 07:02:26	1709	1392	1608	2237	3777	2071	4074	2381
2019-09-16	1900-01-01 07:22:26	2377	1263	1648	2464	2867	1863	2887	3959
2019-09-16	1900-01-01 07:42:26	2561	2617	3262	1982	3327	2727	2217	2064
2019-09-16	1900-01-01 08:02:26	1747	2506	2750	1983	2151	2394	2239	2586
2019-09-16	1900-01-01 08:22:26	1820	1480	1705	2149	1768	2157	3980	2341
2019-09-16	1900-01-01 08:42:26	1932	1462	1789	2948	3419	1989	2565	2351
2019-09-16	1900-01-01 09:02:26	1743	1484	3049	2184	3332	1920	2178	4599
2019-09-16	1900-01-01 09:22:26	2339	1665	2913	4181	3279	4196	2871	3824
2019-09-16	1900-01-01 09:42:26	2731	3773	1789	2650	2819	3077	2447	3550
2019-09-16	1900-01-01 10:02:26	2399	2585	1746	2005	3202	2254	3820	2111
2019-09-16	1900-01-01 10:22:26	2145	2673	2942	2726	2556	2796	2223	3780
2019-09-16	1900-01-01 10:42:26	2226	2039	2536	2859	2116	2225	2231	2219
2019-09-16	1900-01-01 11:02:26	1900	1891	1763	1771	3030	1940	2342	2220
2019-09-16	1900-01-01 11:22:26	1895	1508	1839	2170	2424	2596	2494	2499
2019-09-16	1900-01-01 11:42:26	2687	1328	1727	2615	2131	2121	3775	3353
2019-09-16	1900-01-01 12:02:26	2705	2692	3188	1996	3008	1976	2069	3723
2019-09-16	1900-01-01 12:22:26	3029	1482	1653	2015	3112	3272	2385	2312
2019-09-16	1900-01-01 12:42:26	2926	1537	1814	2271	2030	2110	2259	2411
2019-09-16	1900-01-01 13:02:26	2419	1728	1943	2149	2778	1781	3690	2524
2019-09-16	1900-01-01 13:22:26	2066	1986	2919	2008	2201	2091	2474	1959
2019-09-16	1900-01-01 13:42:26	1997	3031	2646	2393	2254	2328	2300	2340
2019-09-16	1900-01-01 14:02:26	1825	1627	1888	1906	3554	2531	2571	2651
2019-09-16	1900-01-01 14:22:26	2708	1630	1913	2120	2265	3861	2762	3249
2019-09-16	1900-01-01 14:42:26	2222	1667	1744	2469	2645	2290	2580	3019
2019-09-16	1900-01-01 15:02:26	2263	1794	2679	2142	2309	2434	2835	2310
2019-09-16	1900-01-01 15:22:26	2104	1769	2156	2579	2248	1935	2214	2214
2019-09-16	1900-01-01 15:42:26	2659	1549	1803	2191	2438	2181	2816	2480
2019-09-16	1900-01-01 16:02:26	2107	1958	1845	2419	3556	2882	2304	3981
2019-09-16	1900-01-01 16:22:26	2144	3322	2015	2448	2543	2949	2396	2430
2019-09-16	1900-01-01 16:42:26	2715	2214	3214	4065	3217	3071	3626	3913
2019-09-16	1900-01-01 17:02:26	2787	2421	2078	2608	2422	2198	2262	3862
2019-09-16	1900-01-01 17:22:26	3464	1570	3012	3533	3675	2257	2800	2365
2019-09-16	1900-01-01 17:42:26	2201	3054	1982	2341	2576	2327	4138	2508
2019-09-16	1900-01-01 18:02:26	2356	1670	1954	3736	3672	2393	3696	3688
2019-09-16	1900-01-01 18:22:26	3532	3016	2782	3769	3281	3536	3157	2342
2019-09-16	1900-01-01 18:42:26	3666	1967	2368	2598	3432	2688	2674	2536
2019-09-16	1900-01-01 19:02:26	2407	1704	2494	2122	2927	2421	3869	4139
2019-09-16	1900-01-01 19:22:26	3250	3345	2220	2757	3964	2489	3327	3764
2019-09-16	1900-01-01 19:42:26	3380	3231	3595	2226	3210	3732	3427	3805
2019-09-16	1900-01-01 20:02:26	3716	2959	1932	3712	3976	2875	3656	2813
2019-09-16	1900-01-01 20:22:26	3390	1956	3109	3390	2903	2641	3256	3557
2019-09-16	1900-01-01 20:42:26	3351	2466	2265	3098	3661	3840	2761	3197
2019-09-16	1900-01-01 21:02:26	3271	3270	1879	2490	2868	3137	3832	3371
2019-09-16	1900-01-01 21:22:26	2234	2370	3070	3289	3135	2719	3436	3074
2019-09-16	1900-01-01 21:42:26	3079	2134	2102	2580	3135	3412	4022	3828
2019-09-16	1900-01-01 22:02:26	2217	1698	1930	2403	3553	3717	3641	2917
2019-09-16	1900-01-01 22:22:26	2273	1975	2655	3153	2699	2954	3689	4377
2019-09-16	1900-01-01 22:42:26	3598	2725	3376	2328	3479	2742	3671	3612
2019-09-16	1900-01-01 23:02:26	2671	1922	3033	2255	3864	3674	3933	2998
2019-09-16	1900-01-01 23:22:26	3632	2580	2962	2877	2904	2992	3377	2869
2019-09-16	1900-01-01 23:42:26	3312	3193	1902	2353	2616	2655	2884	4152
2019-09-17	1900-01-02 00:02:26	2812	2387	1772	3313	3554	3618	3250	4091
2019-09-17	1900-01-02 00:22:26	2369	3372	2807	3177	3410	2929	3873	3292
2019-09-17	1900-01-02 00:42:26	2192	2721	2134	2775	2699	2744	2756	2832
2019-09-17	1900-01-02 01:02:26	2105	2544	1975	1879	2410	3414	3220	3482
2019-09-17	1900-01-02 01:22:26	2804	1690	2657	3071	2455	3765	3012	3705
2019-09-17	1900-01-02 01:42:26	3469	1845	1886	2786	3566	3637	2515	2916
2019-09-17	1900-01-02 02:02:26	3329	1897	3344	2788	3840	2745	2696	2628
2019-09-17	1900-01-02 02:22:26	2241	1992	3030	3472	2839	2495	3610	3277
2019-09-17	1900-01-02 02:42:26	3295	3447	2074	2371	3959	2444	3955	4409
2019-09-17	1900-01-02 03:02:26	2857	3127	2292	2866	3056	3742	3762	2521
2019-09-17	1900-01-02 03:22:26	2218	1776	2414	2921	2464	3965	3624	4116
2019-09-17	1900-01-02 03:42:26	3362	2973	2062	2162	2234	3325	3175	3793
2019-09-17	1900-01-02 04:02:26	2627	2396	3183	2485	2583	3795	3349	2512
2019-09-17	1900-01-02 04:22:26	2642	1923	3127	2075	3914	3755	2656	2840
2019-09-17	1900-01-02 04:42:26	2924	2580	2544	2613	3528	2929	2848	2610
2019-09-17	1900-01-02 05:02:26	2198	1688	1959	2492	2440	2560	3436	3492
2019-09-17	1900-01-02 05:22:26	2232	1970	2772	2889	2668	2566	3549	3282
2019-09-17	1900-01-02 05:42:26	3363	2730	2825	2876	2353	2186	2565	3308
2019-09-17	1900-01-01 06:02:26	3170	1569	2626	2058	3519	2012	3847	3985
2019-09-17	1900-01-01 06:22:26	2036	1650	1771	2288	3562	2024	2611	2463
2019-09-17	1900-01-01 06:42:26	1938	1457	1873	3262	2329	2908	2739	3183
2019-09-17	1900-01-01 07:02:26	1969	1414	1868	1955	2494	2209	2579	2715
2019-09-17	1900-01-01 07:22:26	2167	2593	2615	1668	2199	2138	4374	2452
2019-09-17	1900-01-01 07:42:26	2107	3402	1832	3695	2544	3638	3511	2552
2019-09-17	1900-01-01 08:02:26	2081	2125	3145	1821	3003	2379	2605	4534
2019-09-17	1900-01-01 08:22:26	2695	1540	2027	2984	3623	2023	2695	2930
2019-09-17	1900-01-01 08:42:26	3396	1491	1837	2097	2788	3422	3670	2018
2019-09-17	1900-01-01 09:02:26	2250	1745	1930	2334	1969	2259	3233	3215
2019-09-17	1900-01-01 09:22:26	2769	3082	1992	2959	2785	3002	2637	4203
2019-09-17	1900-01-01 09:42:26	2347	2104	2793	3926	3636	3462	2866	3043
2019-09-17	1900-01-01 10:02:26	2962	2754	2671	3478	3309	2919	2869	2592
2019-09-17	1900-01-01 10:22:26	2221	2497	3035	1943	2460	2283	2497	4414
2019-09-17	1900-01-01 10:42:26	2014	1577	1926	2513	2265	3734	2743	2347
2019-09-17	1900-01-01 11:02:26	1893	3083	1869	2328	3134	3581	4092	3809
2019-09-17	1900-01-01 11:22:26	3159	2275	1809	2169	3382	2356	4090	2558
2019-09-17	1900-01-01 11:42:26	2308	1734	2025	2284	2108	2003	3550	2613
2019-09-17	1900-01-01 12:02:26	1957	1774	3111	2411	3790	2583	2678	2637
2019-09-17	1900-01-01 12:22:26	1918	1559	2133	2245	2864	2134	2780	3254
2019-09-17	1900-01-01 12:42:26	2100	1741	1900	3185	2377	1981	2465	2550
2019-09-17	1900-01-01 13:02:26	1907	2898	3014	2265	2380	3159	2779	2447
2019-09-17	1900-01-01 13:22:26	2212	1639	1787	2244	2364	2965	3563	3156
2019-09-17	1900-01-01 13:42:26	3198	1510	1937	2420	2281	2050	4314	2619
2019-09-17	1900-01-01 14:02:26	2290	2766	2072	1857	2157	2153	2701	2507
2019-09-17	1900-01-01 14:22:26	2051	1665	1745	2460	3634	2064	2409	2768
2019-09-17	1900-01-01 14:42:26	2751	1601	1845	2890	3301	2133	2704	2673
2019-09-17	1900-01-01 15:02:26	1884	1784	3257	2472	3474	2837	2776	2596
2019-09-17	1900-01-01 15:22:26	2159	3320	2227	3790	2467	3313	2762	4129
2019-09-17	1900-01-01 15:42:26	2852	2717	1661	2571	2550	2326	2737	2960
2019-09-17	1900-01-01 16:02:26	2988	1579	2309	1989	2904	2175	2852	2285
2019-09-17	1900-01-01 16:22:26	3196	1631	3036	2307	2485	2240	4429	2599
2019-09-17	1900-01-01 16:42:26	3038	4160	2543	1891	3556	4103	2860	4527
2019-09-17	1900-01-01 17:02:26	2103	2816	1966	3151	2396	3063	3454	3834
2019-09-17	1900-01-01 17:22:26	2059	2307	2549	3492	3768	2555	2864	3770
2019-09-17	1900-01-01 17:42:26	3086	2926	2917	2484	2836	2481	3343	2839
2019-09-17	1900-01-01 18:02:26	2031	2373	2167	2902	2477	2208	2949	3702
2019-09-17	1900-01-01 18:22:26	2713	1609	2735	2682	3609	3523	3967	2820
2019-09-17	1900-01-01 18:42:26	3566	3288	3369	3643	3051	2819	3652	4124
2019-09-17	1900-01-01 19:02:26	2645	1967	2462	3952	2929	2773	3634	3462
2019-09-17	1900-01-01 19:22:26	3235	3439	3439	2777	3638	2596	4038	3774
2019-09-17	1900-01-01 19:42:26	3241	2416	3055	3350	3239	3843	3070	3665
2019-09-17	1900-01-01 20:02:26	2837	2181	2335	3082	3591	4026	2787	3407
2019-09-17	1900-01-01 20:22:26	2969	2678	2157	2999	3376	3019	3490	3811
2019-09-17	1900-01-01 20:42:26	2484	2183	3208	2862	3146	2771	3758	3463
2019-09-17	1900-01-01 21:02:26	3226	2227	2577	2493	3004	3709	3265	3927
2019-09-17	1900-01-01 21:22:26	3006	2113	3056	3032	3374	2802	3010	2970
2019-09-17	1900-01-01 21:42:26	3031	2346	2225	3092	2843	3594	3915	3291
2019-09-17	1900-01-01 22:02:26	2467	2323	2488	2625	3608	3100	4139	3309
2019-09-17	1900-01-01 22:22:26	2522	1703	3350	2419	3712	4012	3231	3164
2019-09-17	1900-01-01 22:42:26	2260	1888	2207	3640	2829	3223	4104	4779
2019-09-17	1900-01-01 23:02:26	3383	3227	2420	2939	2622	4284	3311	3377
2019-09-17	1900-01-01 23:22:26	2551	2348	1894	3994	2768	3067	4131	3371
2019-09-17	1900-01-01 23:42:26	3512	3170	3355	2938	3888	2778	3311	4641
2019-09-18	1900-01-02 00:02:26	3499	1998	3486	2198	3862	2642	3298	3480
2019-09-18	1900-01-02 00:22:26	3394	2561	2574	3636	2807	2590	2577	4046
2019-09-18	1900-01-02 00:42:26	2579	1759	2014	2612	2844	3760	4215	4391
2019-09-18	1900-01-02 01:02:26	2290	2587	3143	2181	2888	3447	3305	2941
2019-09-18	1900-01-02 01:22:26	2132	3410	2840	2938	3491	3571	3762	2926
2019-09-18	1900-01-02 01:42:26	3374	2430	3462	4317	3007	4184	3656	3431
2019-09-18	1900-01-02 02:02:26	2488	1934	2555	2516	2669	3277	2816	4597
2019-09-18	1900-01-02 02:22:26	2197	2316	2137	3391	3870	3057	4219	3089
2019-09-18	1900-01-02 02:42:26	2244	3393	3259	3232	3669	2489	3011	2521
2019-09-18	1900-01-02 03:02:26	3388	2551	2168	2017	3662	2419	3936	4608
2019-09-18	1900-01-02 03:22:26	2664	1944	3004	3226	2629	2553	2869	3860
2019-09-18	1900-01-02 03:42:26	2496	2746	2549	2020	2545	3370	3146	4442
2019-09-18	1900-01-02 04:02:26	2544	2229	2041	1926	2429	3471	2987	3559
2019-09-18	1900-01-02 04:22:26	3366	3179	3452	3510	4085	3994	3273	4130
2019-09-18	1900-01-02 04:42:26	3244	3054	3278	4317	4031	2738	4699	3056
2019-09-18	1900-01-02 05:02:26	3052	1951	2323	2471	2638	2481	3133	2842
2019-09-18	1900-01-02 05:22:26	2275	1821	2169	3577	2250	2150	3754	2662
2019-09-18	1900-01-02 05:42:26	1977	1849	2799	1903	2089	2102	2797	3450
2019-09-18	1900-01-02 06:02:26	2637	1572	3263	3403	3949	1932	2447	3790
2019-09-18	1900-01-02 06:22:26	1940	3601	2057	2939	3291	1781	2727	2354
2019-09-18	1900-01-02 06:42:26	2200	2352	2617	2100	2590	3719	2751	2988
2019-09-18	1900-01-02 07:02:26	2128	1755	3083	2745	2047	3504	2850	3652
2019-09-18	1900-01-02 07:22:26	2164	1811	2817	2165	2691	2547	4478	3207
2019-09-18	1900-01-02 07:42:26	2247	1912	3124	3367	2051	2156	3413	3927
2019-09-18	1900-01-02 08:02:26	3451	2214	2047	3546	2402	2562	2909	3053
2019-09-18	1900-01-02 08:22:26	2299	3187	2020	2182	3174	2189	3250	2775
2019-09-18	1900-01-02 08:42:26	3059	2692	2191	2397	2046	1898	2795	4019
2019-09-18	1900-01-02 09:02:26	2206	1660	3272	2785	2234	2453	4112	2583
2019-09-18	1900-01-02 09:22:26	2364	1596	2865	2263	2659	2355	3204	3265
2019-09-18	1900-01-02 09:42:26	3662	4227	2561	3375	3604	4440	3358	4200
2019-09-18	1900-01-02 10:02:26	3230	3854	2704	2707	2143	3416	2736	3995
2019-09-18	1900-01-02 10:22:26	2630	3527	3233	3527	3420	2687	3233	3610
2019-09-18	1900-01-02 10:42:26	3271	3526	2615	2983	2219	3474	3781	4001
2019-09-18	1900-01-02 11:02:26	2349	3419	2619	2287	2600	2072	3484	3253
2019-09-18	1900-01-02 11:22:26	2546	3357	2605	3437	2526	2330	2682	3183
2019-09-18	1900-01-02 11:42:26	2663	3354	2325	2401	2289	3683	2915	2864
2019-09-18	1900-01-02 12:02:26	2942	3034	2611	2322	3370	2567	3588	3792
2019-09-18	1900-01-02 12:22:26	2236	2507	3068	2688	2350	2287	2560	3268
2019-09-18	1900-01-02 12:42:26	2369	2910	2269	2178	2260	2362	3278	2882
2019-09-18	1900-01-02 13:02:26	2330	2468	2530	2585	2462	2988	2644	3687
2019-09-18	1900-01-02 13:22:26	2601	2960	2314	3389	2846	2163	2709	2493
2019-09-18	1900-01-02 13:42:26	2957	2239	2051	2422	3470	3759	3930	2478
2019-09-18	1900-01-02 14:02:26	2089	2422	2070	2346	3315	2420	3752	3712
2019-09-18	1900-01-02 14:22:26	2075	2062	2421	2183	2297	2238	2453	2768
2019-09-18	1900-01-02 14:42:26	2149	1977	3266	2303	2396	2207	2992	3220
2019-09-18	1900-01-02 15:02:26	2364	1984	2028	2152	2381	2555	2684	3388
2019-09-18	1900-01-02 15:22:26	2961	2954	2176	2540	2660	3554	2514	2362
2019-09-18	1900-01-02 15:42:26	3262	2101	2125	3676	2368	2234	3759	2859
2019-09-18	1900-01-01 16:02:26	3107	2761	1989	2314	2398	2120	4038	3982
2019-09-18	1900-01-01 16:22:26	1966	1912	2588	2908	3881	2152	2942	3938
2019-09-18	1900-01-01 16:42:26	2995	3338	2621	3054	3464	3796	3784	2381
2019-09-18	1900-01-01 17:02:26	3023	3805	2633	3385	2687	3618	3541	3904
2019-09-18	1900-01-01 17:22:26	2511	3646	2552	3240	2271	2223	2631	3007
2019-09-18	1900-01-01 17:42:26	3094	3034	2823	2592	3472	3662	3000	3218
2019-09-18	1900-01-01 18:02:26	2735	3224	2605	3354	2959	3418	3429	3187
2019-09-18	1900-01-01 18:22:26	2697	2492	2706	3345	2783	2801	3614	3096
2019-09-18	1900-01-01 18:42:26	2737	2635	2640	3500	2653	2503	2976	3256
2019-09-18	1900-01-01 19:02:26	3466	2969	2742	3218	3780	3691	2878	3172
2019-09-18	1900-01-01 19:22:26	2811	2553	3419	2694	3648	2851	2985	2988
2019-09-18	1900-01-01 19:42:26	2513	2965	2684	2907	2558	3049	4185	4332
2019-09-18	1900-01-01 20:02:26	3075	2478	2808	3360	3958	3288	3129	4319
2019-09-18	1900-01-01 20:22:26	3507	2461	2576	3874	3827	2981	3445	3881
2019-09-18	1900-01-01 20:42:26	3438	3140	3275	2420	3461	3606	2940	3854
2019-09-18	1900-01-01 21:02:26	3254	2355	2211	2833	2722	3025	2879	3995
2019-09-18	1900-01-01 21:22:26	2431	2085	2082	2879	3085	2872	3212	2686
2019-09-18	1900-01-01 21:42:26	2221	2494	2704	2548	3465	3195	2791	3123
2019-09-18	1900-01-01 22:02:26	2906	2243	2290	3271	3447	3486	4377	2899
2019-09-18	1900-01-01 22:22:26	2770	3035	2932	2861	2792	3257	3308	4208
2019-09-18	1900-01-01 22:42:26	3183	2674	1997	3532	2484	2917	2818	3962
2019-09-18	1900-01-01 23:02:26	3445	1876	1697	2647	3254	2588	3609	3519
2019-09-18	1900-01-01 23:22:26	3367	1849	3201	4029	3270	3731	3588	3797
2019-09-18	1900-01-01 23:42:26	2531	1890	3113	2877	3384	4029	2747	3595
2019-09-19	1900-01-02 00:02:26	2949	2780	2323	3030	3704	4087	2742	3704
2019-09-19	1900-01-02 00:22:26	2629	1773	2027	2267	2660	2950	2833	2854
2019-09-19	1900-01-02 00:42:26	2297	1852	2015	2284	2392	2727	4074	2972
2019-09-19	1900-01-02 01:02:26	2485	1952	2709	2404	2853	2448	4287	4130
2019-09-19	1900-01-02 01:22:26	3256	3300	3395	3939	2510	2600	3164	2919
2019-09-19	1900-01-02 01:42:26	3258	1965	3479	3584	3956	2915	3540	2696
2019-09-19	1900-01-02 02:02:26	2437	1966	2226	2919	3521	2888	3467	3536
2019-09-19	1900-01-02 02:22:26	2228	1760	2072	2313	3873	3776	2658	2780
2019-09-19	1900-01-02 02:42:26	3693	2476	2176	2983	2852	3424	2791	3861
2019-09-19	1900-01-02 03:02:26	3586	1610	3399	2334	2562	2738	2819	3209
2019-09-19	1900-01-02 03:22:26	3323	1411	3063	3492	2873	2550	2987	3707
2019-09-19	1900-01-02 03:42:26	2516	1623	2660	3120	3938	3164	4543	4300
2019-09-19	1900-01-02 04:02:26	2591	2978	2470	2188	3320	3052	3357	3393
2019-09-19	1900-01-02 04:22:26	2244	2038	2015	3041	3351	2776	2571	2673
2019-09-19	1900-01-02 04:42:26	3318	1813	3426	2526	2916	3281	3809	2858
2019-09-19	1900-01-02 05:02:26	3126	2750	3072	3114	2450	3521	2795	4585
2019-09-19	1900-01-02 05:22:26	3734	3215	2935	3468	2729	3108	3487	3204
2019-09-19	1900-01-02 05:42:26	3311	2096	2637	2261	2826	2467	2523	2524
2019-09-19	1900-01-02 06:02:26	2426	1742	1998	3304	1931	2608	2708	4103
2019-09-19	1900-01-02 06:22:26	2162	1447	2646	2052	2187	2195	2657	3242
2019-09-19	1900-01-02 06:42:26	2223	1267	2287	2120	2188	2637	2758	3976
2019-09-19	1900-01-02 07:02:26	2242	2433	2024	4051	3680	1967	2820	3183
2019-09-19	1900-01-02 07:22:26	3328	1492	2367	3504	3224	2097	3997	3207
2019-09-19	1900-01-02 07:42:26	3604	1491	1782	2393	2233	3196	3510	3676
2019-09-19	1900-01-02 08:02:26	2348	1535	2651	2558	2349	2210	2336	2996
2019-09-19	1900-01-02 08:22:26	2291	1747	1818	2283	2473	2039	2640	2832
2019-09-19	1900-01-02 08:42:26	2157	1463	2191	2290	3328	2292	3419	4169
2019-09-19	1900-01-02 09:02:26	2384	1933	1846	2093	2414	2206	2585	3193
2019-09-19	1900-01-02 09:22:26	2275	1491	1691	3417	2293	2569	2894	2634
2019-09-19	1900-01-02 09:42:26	2501	1634	2551	2989	3543	3179	3384	4087
2019-09-19	1900-01-02 10:02:26	3013	3518	2385	3049	3003	2661	3795	3343
2019-09-19	1900-01-02 10:22:26	3588	3297	2609	2606	2852	3341	3309	3919
2019-09-19	1900-01-02 10:42:26	3137	3013	2455	2309	2559	2337	2870	3233
2019-09-19	1900-01-02 11:02:26	2704	2847	3239	2699	2728	2354	2762	3764
2019-09-19	1900-01-02 11:22:26	2746	2527	2407	2397	3916	3385	2854	2975
2019-09-19	1900-01-02 11:42:26	2758	2438	2220	3118	2340	2224	2850	2771
2019-09-19	1900-01-02 12:02:26	2504	2973	2199	2318	2516	2307	2559	3208
2019-09-19	1900-01-02 12:22:26	3140	2108	2174	2391	2626	3361	2605	2779
2019-09-19	1900-01-02 12:42:26	2393	2171	2572	2521	3668	3279	2408	3576
2019-09-19	1900-01-02 13:02:26	2488	2720	2684	2148	2233	2381	3382	2712
2019-09-19	1900-01-02 13:22:26	2445	2156	2145	2718	2372	2891	2412	3202
2019-09-19	1900-01-02 13:42:26	3339	2015	2259	2477	2503	2543	2671	2877
2019-09-19	1900-01-02 14:02:26	2276	2264	2018	3137	2525	2040	2522	3825
2019-09-19	1900-01-02 14:22:26	2459	1881	2169	2470	3597	2266	3485	2761
2019-09-19	1900-01-02 14:42:26	2233	1765	2523	2425	3014	2207	3060	3010
2019-09-19	1900-01-02 15:02:26	3701	1777	1870	2399	2609	2406	2325	3670
2019-09-19	1900-01-02 15:22:26	3316	2452	1963	2334	2929	2232	3036	2834
2019-09-19	1900-01-02 15:42:26	2288	1526	2004	3295	2278	3253	2728	3058
2019-09-19	1900-01-01 16:22:26	2306	2508	2926	3399	2506	2749	2252	3634
2019-09-19	1900-01-01 16:42:26	2917	2533	2637	2228	3256	2632	2969	3818
2019-09-19	1900-01-01 17:02:26	3545	3228	3379	3507	4042	3349	3458	4022
2019-09-19	1900-01-01 17:22:26	3271	2844	3443	2489	2498	2817	2416	3912
2019-09-19	1900-01-01 17:42:26	3206	2605	2428	3121	3588	3352	3185	3441
2019-09-19	1900-01-01 18:02:26	2391	2598	3703	2597	2742	2492	3773	2969
2019-09-19	1900-01-01 18:22:26	2607	2847	2585	3669	2966	3517	2711	3918
2019-09-19	1900-01-01 18:42:26	2792	2874	3343	3001	3811	2642	2803	2866
2019-09-19	1900-01-01 19:02:26	3494	2528	2499	3771	3083	2744	3476	3073
2019-09-19	1900-01-01 19:22:26	2779	3566	3640	3596	3648	3713	2751	4113
2019-09-19	1900-01-01 19:42:26	3529	2298	3015	2869	3970	2751	2782	2782
2019-09-19	1900-01-01 20:02:26	3443	3179	2231	2614	2818	3056	3570	3724
2019-09-19	1900-01-01 20:22:26	2639	2182	2853	2894	2753	3991	3514	3287
2019-09-19	1900-01-01 20:42:26	2638	2149	3325	3583	4075	3197	2744	3393
2019-09-19	1900-01-01 21:02:26	3259	2535	3291	3006	3142	3220	2563	3740
2019-09-19	1900-01-01 21:22:26	3641	2186	2308	3297	2602	3429	3710	2783
2019-09-19	1900-01-01 21:42:26	3611	2571	3053	2428	3395	3383	3681	3538
2019-09-19	1900-01-01 22:02:26	3122	1944	2280	3621	4162	2974	3102	4301
2019-09-19	1900-01-01 22:22:26	2285	2139	2169	2991	3415	2642	2881	3259
2019-09-19	1900-01-01 22:42:26	2243	2779	3581	2821	2851	3988	3416	3841
2019-09-19	1900-01-01 23:02:26	2924	2467	2492	2468	2656	3684	2902	3178
2019-09-19	1900-01-01 23:22:26	2289	1861	2730	2228	2591	2845	2571	4238
2019-09-19	1900-01-01 23:42:26	2278	1998	3019	3429	3795	3548	2584	3327
2019-09-20	1900-01-02 00:02:26	3599	1651	3368	3665	3928	4074	3961	4748
2019-09-20	1900-01-02 00:22:26	3192	2054	2747	2392	4043	3143	3094	3762
2019-09-20	1900-01-02 00:42:26	2587	2076	2949	3296	2735	2805	3340	4445
2019-09-20	1900-01-02 01:02:26	2336	1659	2497	2341	2464	3333	3497	3201
2019-09-20	1900-01-02 01:22:26	3337	1838	2188	3553	2724	4057	2660	3188
2019-09-20	1900-01-02 01:42:26	3346	3276	2537	3393	2831	3583	2683	4193
2019-09-20	1900-01-02 02:02:26	2794	2803	3130	2920	3836	3119	2762	2871
2019-09-20	1900-01-02 02:22:26	2915	1819	2583	2623	3422	3288	3552	4141
2019-09-20	1900-01-02 02:42:26	2551	1551	3111	2371	3240	2591	3393	4189
2019-09-20	1900-01-02 03:02:26	3305	1462	1989	2360	2460	3367	3302	2902
2019-09-20	1900-01-02 03:22:26	2674	1584	2925	2540	2800	3486	3376	3142
2019-09-20	1900-01-02 03:42:26	3151	2326	3157	2598	3793	4054	2634	3848
2019-09-20	1900-01-02 04:02:26	2612	1666	3355	3334	3819	3220	2622	2966
2019-09-20	1900-01-02 04:22:26	3539	2958	2743	2868	3477	2646	3505	3081
2019-09-20	1900-01-02 04:42:26	2526	2399	2627	2281	2902	2470	3403	4458
2019-09-20	1900-01-02 05:02:26	3008	2403	2583	2408	2767	2285	3085	3055
2019-09-20	1900-01-02 05:22:26	3290	2839	1897	3728	2458	3365	3629	2822
2019-09-20	1900-01-02 05:42:26	2115	3003	2991	3802	3572	2608	2669	2855
2019-09-20	1900-01-02 06:02:26	2079	1981	3067	2552	3995	2416	2623	3761
2019-09-20	1900-01-02 06:22:26	3274	1482	3606	2578	3312	2158	2292	3069
2019-09-20	1900-01-02 06:42:26	2252	1628	3107	3110	2449	1863	3962	2575
2019-09-20	1900-01-02 07:02:26	2202	1428	1886	2302	2455	3075	3860	3609
2019-09-20	1900-01-02 07:22:26	2120	1415	1904	2135	3485	2248	3768	3615
2019-09-20	1900-01-02 07:42:26	2248	1388	1984	2583	2177	2034	3428	3586
2019-09-20	1900-01-02 08:02:26	2103	2100	2498	3467	2355	3124	2239	2867
2019-09-20	1900-01-02 08:22:26	2152	1701	2125	3140	2996	2195	2669	2772
2019-09-20	1900-01-02 08:42:26	2798	1381	1854	2906	2452	2315	2998	3919
2019-09-20	1900-01-02 09:02:26	2726	1804	3688	2563	3675	2733	2456	3105
2019-09-20	1900-01-02 09:22:26	2426	3120	2206	2722	2486	2705	3163	3153
2019-09-20	1900-01-02 09:42:26	2302	2710	1924	2911	2707	3334	3396	3184
2019-09-20	1900-01-02 10:02:26	2222	1593	3114	2374	3514	2145	3561	3304
2019-09-20	1900-01-02 10:22:26	2086	1494	2695	2434	3339	2543	2653	2964
2019-09-20	1900-01-02 10:42:26	2227	1491	1733	2140	3253	4014	2877	2638
2019-09-20	1900-01-02 11:02:26	2055	1635	2739	2274	2816	2703	2721	2815
2019-09-20	1900-01-02 11:22:26	2936	2181	1786	2163	2679	2213	3505	2938
2019-09-20	1900-01-02 11:42:26	2684	1523	1931	3223	2523	2255	3310	4080
2019-09-20	1900-01-02 12:02:26	2050	2007	3800	2221	2157	2426	2444	2397
2019-09-20	1900-01-02 12:22:26	2041	1448	2335	2412	2918	3138	2836	3117
2019-09-20	1900-01-02 12:42:26	2198	1653	2054	3222	3913	2121	2931	2698
2019-09-20	1900-01-02 13:02:26	2359	2798	2027	2602	3181	3033	2829	2438
2019-09-20	1900-01-02 13:22:26	1978	1229	3365	3205	2514	2132	2690	2708
2019-09-20	1900-01-02 13:42:26	2193	1516	1842	2161	3328	2701	3613	4013
2019-09-20	1900-01-02 14:02:26	2237	1714	3177	2309	2439	2617	2638	3685
2019-09-20	1900-01-02 14:22:26	3001	3051	3407	3497	2500	3172	2585	3000
2019-09-20	1900-01-02 14:42:26	2508	2360	3079	2553	3515	3313	2721	3001
2019-09-20	1900-01-02 15:02:26	2273	1405	2085	2567	2652	1959	2693	2827
2019-09-20	1900-01-02 15:22:26	2240	1605	2036	2447	2813	2432	2871	3913
2019-09-20	1900-01-02 15:42:26	2789	1970	2199	2635	3941	2246	2897	3740
2019-09-20	1900-01-01 16:02:26	1885	1509	2122	3202	2880	2327	3863	2851

## Sheet: VCO2
	Groups:	Group 1:	1
Computer	ID#:	310	306	307	798	308	309	312	NT
Date/Clock	BW (g) in:	27.1	30.5	27	24.7	21.4	23	21.8	19.7
Time	BW (g) out:	25.9	27.3	25.4	23	20.5	22.2	20.9	20.6
2019-09-15	17:02:26	2521	2379	1846	2133	2764	3152	1978	1696
2019-09-15	17:22:26	2391	2475	2431	2750	2214	2569	1261	1774
2019-09-15	17:42:26	2014	2453	1691	1384	2049	2418	1490	3161
2019-09-15	18:02:26	1739	1260	1521	3325	1898	1345	1554	1624
2019-09-15	18:22:26	1623	1242	2528	2819	3181	1286	3041	1698
2019-09-15	18:42:26	1249	1462	2468	2897	1781	2422	3135	1670
2019-09-15	19:02:26	1922	2707	1437	2764	2091	2411	3128	3125
2019-09-15	19:22:26	2694	1416	2707	2459	3371	1542	3154	1523
2019-09-15	19:42:26	2756	2347	2578	3016	3198	2109	2924	3054
2019-09-15	20:02:26	2888	2259	2564	2372	3090	2828	2890	3109
2019-09-15	20:22:26	2877	2357	2466	3008	2421	2952	3250	3213
2019-09-15	20:42:26	2737	2218	2439	2547	2687	2659	2967	2736
2019-09-15	21:02:26	2791	2538	1386	2268	3062	2798	2802	3044
2019-09-15	21:22:26	2798	1462	2205	2100	2326	2429	3045	2035
2019-09-15	21:42:26	2686	2007	2737	3351	2989	1964	2058	1994
2019-09-15	22:02:26	2788	2570	1810	2505	2984	1648	3651	2940
2019-09-15	22:22:26	2729	2328	2553	1548	2324	3016	3651	3560
2019-09-15	22:42:26	2047	2452	2874	2576	2180	3063	2764	3567
2019-09-15	23:02:26	2417	2444	2495	2738	3015	2974	3369	3428
2019-09-15	23:22:26	2671	1489	2630	2431	2396	2277	3240	2434
2019-09-15	23:42:26	2833	1222	2423	2242	3354	3000	2708	3736
2019-09-16	1900-01-01 00:02:26	1996	1003	1458	1652	2701	3409	3037	3789
2019-09-16	1900-01-01 00:22:26	2502	2813	1988	2099	1956	2996	2977	3558
2019-09-16	1900-01-01 00:42:26	2951	2721	2755	1627	3008	2025	2681	3097
2019-09-16	1900-01-01 01:02:26	3013	2608	1951	2861	2756	3324	3160	3091
2019-09-16	1900-01-01 01:22:26	2586	2504	2273	1687	3241	3223	1843	2084
2019-09-16	1900-01-01 01:42:26	3026	2177	1638	2151	2103	2909	1840	2251
2019-09-16	1900-01-01 02:02:26	2105	1926	2129	2731	3104	2507	3599	1934
2019-09-16	1900-01-01 02:22:26	1888	1847	2301	2047	2281	2214	3481	3479
2019-09-16	1900-01-01 02:42:26	2773	1076	1512	3088	3527	2229	3502	3799
2019-09-16	1900-01-01 03:02:26	2282	856	1520	2039	2535	3230	2611	3276
2019-09-16	1900-01-01 03:22:26	2335	1062	1455	1840	2135	3376	3447	3597
2019-09-16	1900-01-01 03:42:26	2793	2628	2692	1964	2044	3241	2673	2643
2019-09-16	1900-01-01 04:02:26	3252	2603	1994	1899	3338	2680	2684	2654
2019-09-16	1900-01-01 04:22:26	2284	1518	2859	2329	2903	2400	2534	2025
2019-09-16	1900-01-01 04:42:26	1883	2725	2896	2449	2429	2275	3815	1972
2019-09-16	1900-01-01 05:02:26	1840	2647	2422	1921	2078	3011	3359	4127
2019-09-16	1900-01-01 05:22:26	3150	1761	1889	2509	2720	3353	2283	2463
2019-09-16	1900-01-01 05:42:26	2997	1244	2151	3739	1972	2273	3538	2292
2019-09-16	1900-01-01 06:02:26	1957	1712	2446	2409	1847	2907	2414	1876
2019-09-16	1900-01-01 06:22:26	2679	2263	2603	2683	1836	2239	2390	2592
2019-09-16	1900-01-01 06:42:26	1927	1785	1691	2336	1820	2075	2220	2527
2019-09-16	1900-01-01 07:02:26	1662	1200	1439	1956	3465	1986	3908	2151
2019-09-16	1900-01-01 07:22:26	2391	1114	1355	2295	2690	1748	2675	3658
2019-09-16	1900-01-01 07:42:26	2424	2336	2727	1875	3072	2661	2151	1890
2019-09-16	1900-01-01 08:02:26	1613	2349	2462	1818	1873	2297	2080	2306
2019-09-16	1900-01-01 08:22:26	1744	1413	1460	2008	1550	2107	3856	2111
2019-09-16	1900-01-01 08:42:26	1826	1382	1486	2839	3023	1881	2497	2157
2019-09-16	1900-01-01 09:02:26	1593	1360	2604	2000	3069	1748	2044	4116
2019-09-16	1900-01-01 09:22:26	2145	1549	2573	3606	2760	3615	2504	3335
2019-09-16	1900-01-01 09:42:26	2399	3341	1576	2412	2591	2868	2290	3214
2019-09-16	1900-01-01 10:02:26	2222	2358	1528	1779	2940	2096	3548	1899
2019-09-16	1900-01-01 10:22:26	1831	2408	2469	2368	2264	2454	2162	3274
2019-09-16	1900-01-01 10:42:26	1807	1785	2224	2405	1899	2073	2084	1879
2019-09-16	1900-01-01 11:02:26	1598	1694	1605	1491	2862	1783	2124	1921
2019-09-16	1900-01-01 11:22:26	1586	1383	1677	1857	2102	2247	2254	2077
2019-09-16	1900-01-01 11:42:26	2285	1256	1542	2313	1940	1916	3487	3039
2019-09-16	1900-01-01 12:02:26	2322	2390	2868	1704	2803	1850	2007	3429
2019-09-16	1900-01-01 12:22:26	2748	1214	1426	1773	2956	2952	2133	1945
2019-09-16	1900-01-01 12:42:26	2773	1334	1629	2013	1763	1794	1974	2100
2019-09-16	1900-01-01 13:02:26	2176	1430	1597	1893	2461	1609	3037	2065
2019-09-16	1900-01-01 13:22:26	1892	1614	2569	1818	1964	1672	2292	1670
2019-09-16	1900-01-01 13:42:26	1841	2544	2338	2112	1940	1805	2120	2116
2019-09-16	1900-01-01 14:02:26	1640	1500	1712	1619	3234	2088	2178	2126
2019-09-16	1900-01-01 14:22:26	2509	1413	1714	1709	2049	3190	2352	2828
2019-09-16	1900-01-01 14:42:26	2061	1460	1565	2037	2412	2098	2328	2811
2019-09-16	1900-01-01 15:02:26	2066	1518	2334	1792	2174	2258	2492	2041
2019-09-16	1900-01-01 15:22:26	1968	1581	1858	2308	2055	1743	1944	1861
2019-09-16	1900-01-01 15:42:26	2615	1280	1704	1894	2211	1906	2552	2346
2019-09-16	1900-01-01 16:02:26	2071	1629	1649	2060	3152	2567	2056	3706
2019-09-16	1900-01-01 16:22:26	2051	2803	1876	2122	2503	2567	2039	2299
2019-09-16	1900-01-01 16:42:26	2510	2008	2763	3239	2887	2610	3226	3408
2019-09-16	1900-01-01 17:02:26	2594	2048	1783	2106	2212	1850	1844	3788
2019-09-16	1900-01-01 17:22:26	3167	1292	2704	2844	3336	1885	2297	2183
2019-09-16	1900-01-01 17:42:26	2142	2521	1805	1989	2366	1901	3746	2224
2019-09-16	1900-01-01 18:02:26	2190	1514	1660	3202	3580	1894	3692	3476
2019-09-16	1900-01-01 18:22:26	3278	2661	2633	3344	3034	3138	2965	2229
2019-09-16	1900-01-01 18:42:26	3426	1666	2202	2264	3268	2471	2489	2370
2019-09-16	1900-01-01 19:02:26	2328	1340	2338	1931	2792	2297	3726	3837
2019-09-16	1900-01-01 19:22:26	3158	2680	2038	2481	3821	2325	3161	3716
2019-09-16	1900-01-01 19:42:26	3297	2908	3425	1939	3000	3485	3297	3586
2019-09-16	1900-01-01 20:02:26	3568	2690	1874	3385	3853	2713	3532	2679
2019-09-16	1900-01-01 20:22:26	3255	1714	2996	2960	2725	2479	3065	3369
2019-09-16	1900-01-01 20:42:26	3295	2245	2123	2728	3619	3670	2528	2907
2019-09-16	1900-01-01 21:02:26	3320	3049	1752	2193	2745	2965	3740	3165
2019-09-16	1900-01-01 21:22:26	2243	2179	2991	2881	3021	2495	3516	2855
2019-09-16	1900-01-01 21:42:26	3018	1921	2007	2338	3058	3320	3874	3563
2019-09-16	1900-01-01 22:02:26	2237	1621	1813	2005	3454	3591	3610	2738
2019-09-16	1900-01-01 22:22:26	2247	1872	2669	2816	2606	2901	3747	4194
2019-09-16	1900-01-01 22:42:26	3486	2606	3296	2186	3310	2627	3678	3321
2019-09-16	1900-01-01 23:02:26	2658	1766	2975	2068	3829	3664	3847	2794
2019-09-16	1900-01-01 23:22:26	3602	2427	2907	2518	2762	2885	3185	2745
2019-09-16	1900-01-01 23:42:26	3267	2908	1771	2079	2502	2663	2617	4060
2019-09-17	1900-01-02 00:02:26	2803	2272	1692	3029	3493	3534	3049	4065
2019-09-17	1900-01-02 00:22:26	2251	3117	2675	2937	3405	2864	3953	3213
2019-09-17	1900-01-02 00:42:26	2066	2510	2023	2474	2515	2772	2633	2683
2019-09-17	1900-01-02 01:02:26	2031	2321	1809	1706	2360	3438	2970	3298
2019-09-17	1900-01-02 01:22:26	2862	1574	2566	2855	2424	3769	2838	3630
2019-09-17	1900-01-02 01:42:26	3356	1570	1683	2616	3590	3542	2402	2722
2019-09-17	1900-01-02 02:02:26	3304	1535	3009	2437	3794	2634	2491	2520
2019-09-17	1900-01-02 02:22:26	2219	1686	2895	3206	2701	2476	3611	2969
2019-09-17	1900-01-02 02:42:26	3241	3101	1849	2177	3846	2389	3839	4125
2019-09-17	1900-01-02 03:02:26	2774	2836	2271	2477	2892	3643	3534	2358
2019-09-17	1900-01-02 03:22:26	2110	1571	2286	2601	2318	3872	3538	3885
2019-09-17	1900-01-02 03:42:26	3266	2602	1894	1985	2138	3349	3089	3770
2019-09-17	1900-01-02 04:02:26	2638	2197	2969	2217	2480	3740	3130	2401
2019-09-17	1900-01-02 04:22:26	2610	1655	2915	1828	3681	3778	2520	2410
2019-09-17	1900-01-02 04:42:26	2882	2390	2316	2330	3413	2895	2605	2449
2019-09-17	1900-01-02 05:02:26	2089	1446	1752	2215	2271	2391	3498	3199
2019-09-17	1900-01-02 05:22:26	2110	1700	2724	2668	2487	2483	3522	2808
2019-09-17	1900-01-02 05:42:26	3229	2394	2728	2563	2088	2073	2457	3025
2019-09-17	1900-01-01 06:02:26	3052	1335	2567	1897	3042	1953	3635	3425
2019-09-17	1900-01-01 06:22:26	1902	1436	1675	1994	3134	1853	2414	2293
2019-09-17	1900-01-01 06:42:26	1837	1134	1818	2921	2094	2818	2537	2823
2019-09-17	1900-01-01 07:02:26	1798	1136	1778	1673	2256	2011	2363	2244
2019-09-17	1900-01-01 07:22:26	1867	1987	2492	1437	1855	1989	3974	2043
2019-09-17	1900-01-01 07:42:26	1928	2942	1642	3060	2229	3355	3437	2079
2019-09-17	1900-01-01 08:02:26	1825	1892	2856	1509	2557	2085	2541	4068
2019-09-17	1900-01-01 08:22:26	2467	1400	1837	2641	3407	1804	2397	2574
2019-09-17	1900-01-01 08:42:26	3050	1374	1710	1854	2489	3050	3418	1823
2019-09-17	1900-01-01 09:02:26	2005	1527	1772	1950	1676	1895	2983	2703
2019-09-17	1900-01-01 09:22:26	2708	2682	1725	2677	2305	2507	2323	3642
2019-09-17	1900-01-01 09:42:26	2067	1842	2683	3095	2994	2997	2424	2519
2019-09-17	1900-01-01 10:02:26	2437	2464	2340	2968	2850	2653	2320	2162
2019-09-17	1900-01-01 10:22:26	1884	2302	2662	1554	2206	2051	2051	3743
2019-09-17	1900-01-01 10:42:26	1634	1457	1787	2020	1888	3309	2238	2259
2019-09-17	1900-01-01 11:02:26	1464	2581	1706	2013	2839	3448	3496	3380
2019-09-17	1900-01-01 11:22:26	2615	2106	1591	1804	3092	2117	3881	2333
2019-09-17	1900-01-01 11:42:26	1994	1568	1719	1843	1848	1920	3369	2367
2019-09-17	1900-01-01 12:02:26	1666	1627	2840	1904	3427	2328	2477	2293
2019-09-17	1900-01-01 12:22:26	1653	1400	1946	1860	2649	1871	2529	3020
2019-09-17	1900-01-01 12:42:26	1657	1535	1771	2625	2135	1659	2224	2434
2019-09-17	1900-01-01 13:02:26	1542	2579	2832	1937	2123	2613	2318	2239
2019-09-17	1900-01-01 13:22:26	1838	1460	1666	1859	2040	2653	3174	2800
2019-09-17	1900-01-01 13:42:26	2834	1339	1649	2027	2029	1870	4054	2195
2019-09-17	1900-01-01 14:02:26	2088	2299	1717	1418	1850	1844	2569	2191
2019-09-17	1900-01-01 14:22:26	1847	1350	1571	2043	3114	1686	2296	2340
2019-09-17	1900-01-01 14:42:26	2607	1385	1611	2462	2749	1708	2385	2438
2019-09-17	1900-01-01 15:02:26	1717	1453	2777	1943	3018	2327	2337	2297
2019-09-17	1900-01-01 15:22:26	1851	2705	1888	3128	2279	3068	2424	3779
2019-09-17	1900-01-01 15:42:26	2576	2555	1465	2246	2170	2207	2256	2772
2019-09-17	1900-01-01 16:02:26	2722	1377	2005	1765	2418	2074	2360	2134
2019-09-17	1900-01-01 16:22:26	2974	1451	2726	1798	1943	2042	4033	2410
2019-09-17	1900-01-01 16:42:26	2755	3321	2214	1503	2860	3519	2575	3994
2019-09-17	1900-01-01 17:02:26	1957	2531	1740	2442	2062	2963	3288	3299
2019-09-17	1900-01-01 17:22:26	1880	1987	2244	2726	3537	2503	2697	3620
2019-09-17	1900-01-01 17:42:26	2753	2702	2568	1794	2402	2344	3286	2586
2019-09-17	1900-01-01 18:02:26	1780	2164	1977	2307	2192	2073	2819	3452
2019-09-17	1900-01-01 18:22:26	2378	1497	2556	2167	3322	3252	3758	2498
2019-09-17	1900-01-01 18:42:26	3230	2930	3270	3077	2901	2583	3472	3821
2019-09-17	1900-01-01 19:02:26	2615	1858	2294	3469	2757	2590	3579	3160
2019-09-17	1900-01-01 19:22:26	3096	3198	3306	2409	3508	2458	3928	3734
2019-09-17	1900-01-01 19:42:26	3124	2152	2973	2908	3031	3820	2975	3439
2019-09-17	1900-01-01 20:02:26	2734	2023	2300	2780	3514	3844	2740	3326
2019-09-17	1900-01-01 20:22:26	2974	2635	2057	2775	3493	2953	3570	3794
2019-09-17	1900-01-01 20:42:26	2328	2119	3178	2657	2953	2583	3687	3257
2019-09-17	1900-01-01 21:02:26	3217	2103	2544	2210	2805	3683	3199	3822
2019-09-17	1900-01-01 21:22:26	2915	2012	2971	2817	3272	2683	2939	2808
2019-09-17	1900-01-01 21:42:26	3005	2237	2036	2890	2667	3524	3929	3207
2019-09-17	1900-01-01 22:02:26	2397	2153	2493	2349	3545	2954	4153	3004
2019-09-17	1900-01-01 22:22:26	2515	1635	3295	2208	3592	4000	3030	3018
2019-09-17	1900-01-01 22:42:26	2295	1754	2117	3440	2672	3238	4084	4634
2019-09-17	1900-01-01 23:02:26	3379	3059	2362	2798	2511	4216	3283	3148
2019-09-17	1900-01-01 23:22:26	2599	2321	1876	3773	2705	3024	4194	3286
2019-09-17	1900-01-01 23:42:26	3377	2930	3136	2721	3753	2708	3318	4480
2019-09-18	1900-01-02 00:02:26	3458	1891	3207	1900	3784	2593	3263	3280
2019-09-18	1900-01-02 00:22:26	3318	2373	2492	3320	2679	2553	2508	3862
2019-09-18	1900-01-02 00:42:26	2497	1650	1811	2331	2691	3665	4008	4319
2019-09-18	1900-01-02 01:02:26	2299	2542	2991	1813	2710	3452	3195	2670
2019-09-18	1900-01-02 01:22:26	1975	3218	2784	2514	3481	3605	3638	2673
2019-09-18	1900-01-02 01:42:26	3331	2360	3355	3621	2852	4167	3623	3285
2019-09-18	1900-01-02 02:02:26	2444	1748	2386	1989	2482	3256	2732	4452
2019-09-18	1900-01-02 02:22:26	2166	2133	2106	2792	3759	2751	4168	2874
2019-09-18	1900-01-02 02:42:26	2191	3164	3147	2708	3613	2374	2858	2339
2019-09-18	1900-01-02 03:02:26	3300	2420	2072	1690	3620	2311	3722	4322
2019-09-18	1900-01-02 03:22:26	2662	1829	2929	2704	2588	2510	2782	3629
2019-09-18	1900-01-02 03:42:26	2522	2616	2474	1601	2299	3284	2864	4055
2019-09-18	1900-01-02 04:02:26	2580	2025	1889	1557	2242	3529	2651	3438
2019-09-18	1900-01-02 04:22:26	3390	2924	3080	2765	3840	3879	3003	3975
2019-09-18	1900-01-02 04:42:26	3202	2868	3037	3602	3854	2625	4498	2794
2019-09-18	1900-01-02 05:02:26	3012	1836	2093	2126	2551	2361	3028	2483
2019-09-18	1900-01-02 05:22:26	2192	1606	2022	3076	2125	2095	3614	2434
2019-09-18	1900-01-02 05:42:26	1902	1725	2652	1580	1855	1951	2543	3074
2019-09-18	1900-01-02 06:02:26	2640	1446	3140	2823	3435	1757	2254	3556
2019-09-18	1900-01-02 06:22:26	1823	3142	1836	2733	3313	1578	2322	2267
2019-09-18	1900-01-02 06:42:26	1997	2275	2451	1866	2479	3376	2182	2537
2019-09-18	1900-01-02 07:02:26	1925	1617	2775	2292	1967	3415	2252	3083
2019-09-18	1900-01-02 07:22:26	1928	1610	2571	1746	2360	2261	3760	2978
2019-09-18	1900-01-02 07:42:26	1889	1653	2917	2890	1799	2027	3273	3566
2019-09-18	1900-01-02 08:02:26	3119	1910	1883	3122	2007	2400	2704	2732
2019-09-18	1900-01-02 08:22:26	2028	2745	1811	1930	2704	1922	2927	2529
2019-09-18	1900-01-02 08:42:26	2632	2515	1876	2114	1796	1618	2397	3597
2019-09-18	1900-01-02 09:02:26	1868	1515	2863	2464	1711	1929	3610	2229
2019-09-18	1900-01-02 09:22:26	2116	1411	2462	1809	1948	1916	2944	2827
2019-09-18	1900-01-02 09:42:26	3208	3416	2108	2760	2814	3531	2842	3558
2019-09-18	1900-01-02 10:02:26	2905	3169	2146	2165	1606	2881	2304	3364
2019-09-18	1900-01-02 10:22:26	2202	2846	2596	2841	2820	2057	2563	2714
2019-09-18	1900-01-02 10:42:26	2781	2820	2135	2402	1824	2816	3156	3255
2019-09-18	1900-01-02 11:02:26	1871	2730	2120	1761	2048	1863	2995	2566
2019-09-18	1900-01-02 11:22:26	1991	2600	2085	2668	1929	1833	2114	2665
2019-09-18	1900-01-02 11:42:26	2060	2600	1907	1941	1728	3023	2240	2189
2019-09-18	1900-01-02 12:02:26	2465	2466	2165	1865	2785	2370	2956	3259
2019-09-18	1900-01-02 12:22:26	1786	1961	2569	2071	1997	2022	1882	2481
2019-09-18	1900-01-02 12:42:26	1913	2340	1948	1674	1825	2006	2464	2166
2019-09-18	1900-01-02 13:02:26	1924	1900	2071	2005	1881	2471	1962	3186
2019-09-18	1900-01-02 13:22:26	2056	2306	1842	2794	2097	1720	2040	1931
2019-09-18	1900-01-02 13:42:26	2463	1667	1690	1985	2697	3082	3093	1840
2019-09-18	1900-01-02 14:02:26	1803	1879	1559	1920	2821	2195	3253	3153
2019-09-18	1900-01-02 14:22:26	1683	1560	1910	1782	2068	1996	2179	2175
2019-09-18	1900-01-02 14:42:26	1875	1539	2654	1750	2006	1879	2505	2621
2019-09-18	1900-01-02 15:02:26	1904	1484	1746	1714	1921	2150	2181	2822
2019-09-18	1900-01-02 15:22:26	2509	2339	1901	2002	2111	3190	2062	2083
2019-09-18	1900-01-02 15:42:26	2801	1633	1787	2943	1844	1992	3178	2383
2019-09-18	1900-01-01 16:02:26	2807	2240	1706	1982	1844	1852	3540	3416
2019-09-18	1900-01-01 16:22:26	1684	1466	2179	2469	3078	1809	2726	3541
2019-09-18	1900-01-01 16:42:26	2489	2548	2071	2358	2933	3186	3405	1949
2019-09-18	1900-01-01 17:02:26	2451	2883	2152	2770	2323	3251	3211	3304
2019-09-18	1900-01-01 17:22:26	2029	2843	2034	2637	2004	1890	2075	2329
2019-09-18	1900-01-01 17:42:26	2486	2331	2348	2156	3000	3047	2244	2515
2019-09-18	1900-01-01 18:02:26	2395	2486	2130	2915	2745	3142	2695	2560
2019-09-18	1900-01-01 18:22:26	2580	1963	2380	3012	2461	2381	3413	2491
2019-09-18	1900-01-01 18:42:26	2325	2087	2225	3237	2445	2305	2767	2711
2019-09-18	1900-01-01 19:02:26	3116	2237	2511	2894	3355	3270	2684	2750
2019-09-18	1900-01-01 19:22:26	2769	1948	3044	2397	3449	2639	2609	2586
2019-09-18	1900-01-01 19:42:26	2435	2322	2522	2644	2371	2825	3902	3996
2019-09-18	1900-01-01 20:02:26	2955	1959	2715	3133	3715	3115	2965	4054
2019-09-18	1900-01-01 20:22:26	3411	1950	2408	3579	3703	2800	3343	3559
2019-09-18	1900-01-01 20:42:26	3384	2504	3121	2180	3293	3271	2875	3847
2019-09-18	1900-01-01 21:02:26	3212	1803	1965	2738	2626	2926	2807	3929
2019-09-18	1900-01-01 21:22:26	2350	1607	1949	2773	3119	2847	3098	2477
2019-09-18	1900-01-01 21:42:26	2176	2099	2688	2345	3517	3064	2633	2939
2019-09-18	1900-01-01 22:02:26	2929	1789	2204	3078	3475	3424	4324	2922
2019-09-18	1900-01-01 22:22:26	2814	2552	2851	2578	2604	3237	3196	4131
2019-09-18	1900-01-01 22:42:26	3068	2261	1923	3333	2390	2758	2709	3810
2019-09-18	1900-01-01 23:02:26	3405	1636	1644	2450	3141	2482	3603	3406
2019-09-18	1900-01-01 23:22:26	3343	1641	3056	3757	3134	3597	3584	3721
2019-09-18	1900-01-01 23:42:26	2410	1603	3023	2705	3369	3984	2667	3378
2019-09-19	1900-01-02 00:02:26	2968	2495	2135	2906	3655	4024	2529	3584
2019-09-19	1900-01-02 00:22:26	2548	1567	1948	2062	2522	2917	2596	2772
2019-09-19	1900-01-02 00:42:26	2200	1651	1930	2118	2319	2536	3908	2854
2019-09-19	1900-01-02 01:02:26	2473	1769	2709	2260	2786	2458	4294	4108
2019-09-19	1900-01-02 01:22:26	3208	3089	3213	3605	2436	2505	3154	2821
2019-09-19	1900-01-02 01:42:26	3205	1797	3317	3354	3711	2817	3463	2563
2019-09-19	1900-01-02 02:02:26	2422	1736	2070	2643	3479	2815	3460	3200
2019-09-19	1900-01-02 02:22:26	2210	1608	1863	2113	3832	3719	2422	2631
2019-09-19	1900-01-02 02:42:26	3632	2413	2062	2834	2663	3457	2528	3710
2019-09-19	1900-01-02 03:02:26	3520	1468	3054	2180	2492	2690	2559	2988
2019-09-19	1900-01-02 03:22:26	3262	1239	2933	3247	2761	2465	2642	3566
2019-09-19	1900-01-02 03:42:26	2442	1522	2602	2922	3792	3090	4111	3949
2019-09-19	1900-01-02 04:02:26	2387	2663	2273	1946	3246	3057	3102	3213
2019-09-19	1900-01-02 04:22:26	2167	1918	1917	2829	3335	2780	2413	2596
2019-09-19	1900-01-02 04:42:26	3226	1757	3167	2288	2822	3359	3640	2644
2019-09-19	1900-01-02 05:02:26	3089	2657	2970	2896	2366	3492	2595	4298
2019-09-19	1900-01-02 05:22:26	3554	3033	2845	3215	2615	3092	3449	3056
2019-09-19	1900-01-02 05:42:26	3261	1944	2554	2002	2662	2412	2361	2325
2019-09-19	1900-01-02 06:02:26	2365	1629	1961	3061	1813	2618	2426	3946
2019-09-19	1900-01-02 06:22:26	2092	1375	2639	1760	1942	2126	2330	3102
2019-09-19	1900-01-02 06:42:26	2150	1218	2239	1899	1918	2472	2356	3902
2019-09-19	1900-01-02 07:02:26	2209	2316	1871	3573	3311	1915	2314	2985
2019-09-19	1900-01-02 07:22:26	3322	1368	2239	3273	2785	1938	3494	3062
2019-09-19	1900-01-02 07:42:26	3308	1420	1637	2087	1806	2916	3232	3400
2019-09-19	1900-01-02 08:02:26	2269	1431	2313	2242	1904	2055	2039	2533
2019-09-19	1900-01-02 08:22:26	2232	1584	1663	1969	1981	1839	2237	2482
2019-09-19	1900-01-02 08:42:26	2049	1298	1974	1890	2678	1986	2838	3790
2019-09-19	1900-01-02 09:02:26	2154	1701	1638	1801	1838	1946	2062	2877
2019-09-19	1900-01-02 09:22:26	2017	1282	1526	3020	1806	2119	2275	2347
2019-09-19	1900-01-02 09:42:26	2260	1400	2303	2672	2882	2624	2557	3687
2019-09-19	1900-01-02 10:02:26	2635	2922	1919	2753	2397	2308	3075	2845
2019-09-19	1900-01-02 10:22:26	2949	2616	2126	2157	2101	2877	2603	3389
2019-09-19	1900-01-02 10:42:26	2645	2395	1932	1875	1846	1947	2158	2462
2019-09-19	1900-01-02 11:02:26	2152	2164	2644	2132	2035	1898	2142	3042
2019-09-19	1900-01-02 11:22:26	2253	2015	1912	1817	2986	2935	2192	2343
2019-09-19	1900-01-02 11:42:26	2399	2038	1767	2564	1860	2029	2316	2174
2019-09-19	1900-01-02 12:02:26	1938	2407	1758	1724	1857	1946	2167	2470
2019-09-19	1900-01-02 12:22:26	2565	1626	1725	1754	1888	2759	2104	2081
2019-09-19	1900-01-02 12:42:26	1851	1685	2048	1931	2888	2785	1971	3125
2019-09-19	1900-01-02 13:02:26	1847	2104	2436	1692	1967	2265	2710	2252
2019-09-19	1900-01-02 13:22:26	1886	1684	1932	2082	1954	2676	1910	2492
2019-09-19	1900-01-02 13:42:26	2662	1490	2035	1846	1954	2227	2019	2278
2019-09-19	1900-01-02 14:02:26	1720	1794	1859	2645	1868	1593	1914	3164
2019-09-19	1900-01-02 14:22:26	1829	1363	1970	2191	2923	1966	2755	2270
2019-09-19	1900-01-02 14:42:26	1686	1386	2221	2046	2778	1763	2584	2156
2019-09-19	1900-01-02 15:02:26	2862	1262	1620	1926	2322	1800	2018	2856
2019-09-19	1900-01-02 15:22:26	2925	1834	1755	1873	2801	1766	2646	2227
2019-09-19	1900-01-02 15:42:26	2148	1171	1730	2656	1980	2681	2195	2321
2019-09-19	1900-01-01 16:22:26	2080	1968	2520	2720	2131	2401	1660	2909
2019-09-19	1900-01-01 16:42:26	2728	2149	2469	1934	2776	2416	2428	3015
2019-09-19	1900-01-01 17:02:26	2959	2690	2923	3061	3412	3187	2888	3383
2019-09-19	1900-01-01 17:22:26	2880	2469	2930	2186	2186	2534	2031	3080
2019-09-19	1900-01-01 17:42:26	2706	2238	1953	2755	2814	2895	2597	2695
2019-09-19	1900-01-01 18:02:26	1924	2200	3042	2305	2299	1993	3268	2359
2019-09-19	1900-01-01 18:22:26	2073	2428	2184	3337	2466	3007	2361	3153
2019-09-19	1900-01-01 18:42:26	2328	2311	2999	2846	3505	2374	2382	2450
2019-09-19	1900-01-01 19:02:26	3080	2057	2323	3576	2634	2322	3303	2424
2019-09-19	1900-01-01 19:22:26	2623	2877	3415	3434	3408	3083	2676	3719
2019-09-19	1900-01-01 19:42:26	3273	1790	2803	2634	3790	2528	2600	2464
2019-09-19	1900-01-01 20:02:26	3333	2536	2027	2394	2561	2905	3461	3539
2019-09-19	1900-01-01 20:22:26	2481	1935	2714	2788	2512	3770	3483	3024
2019-09-19	1900-01-01 20:42:26	2443	1852	3263	3430	3931	3040	2630	3236
2019-09-19	1900-01-01 21:02:26	3178	2265	3203	2861	2848	3026	2343	3512
2019-09-19	1900-01-01 21:22:26	3495	1828	2219	3098	2472	3394	3613	2686
2019-09-19	1900-01-01 21:42:26	3557	2242	3003	2294	3379	3480	3658	3285
2019-09-19	1900-01-01 22:02:26	3003	1786	2180	3455	3968	2862	2970	4180
2019-09-19	1900-01-01 22:22:26	2207	1895	2120	2873	3344	2624	2753	3083
2019-09-19	1900-01-01 22:42:26	2154	2519	3332	2560	2628	3981	3166	3570
2019-09-19	1900-01-01 23:02:26	2921	2373	2323	2308	2421	3688	2728	2965
2019-09-19	1900-01-01 23:22:26	2253	1784	2658	2056	2450	2758	2582	4196
2019-09-19	1900-01-01 23:42:26	2226	1877	2758	3277	3595	3597	2432	3268
2019-09-20	1900-01-02 00:02:26	3572	1574	3231	3522	3893	4159	3843	4673
2019-09-20	1900-01-02 00:22:26	3144	1948	2677	2180	3925	3047	3052	3824
2019-09-20	1900-01-02 00:42:26	2515	1939	2763	3122	2525	2763	3289	4416
2019-09-20	1900-01-02 01:02:26	2307	1562	2271	2116	2335	3297	3418	3026
2019-09-20	1900-01-02 01:22:26	3261	1796	2029	3201	2522	4090	2592	3072
2019-09-20	1900-01-02 01:42:26	3281	3039	2482	3024	2738	3594	2649	4178
2019-09-20	1900-01-02 02:02:26	2773	2667	3084	2798	3595	3049	2683	2755
2019-09-20	1900-01-02 02:22:26	2869	1741	2433	2354	3214	3214	3522	3953
2019-09-20	1900-01-02 02:42:26	2472	1473	2995	2058	3002	2488	3297	4043
2019-09-20	1900-01-02 03:02:26	3412	1469	1871	2085	2304	3339	3360	2757
2019-09-20	1900-01-02 03:22:26	2671	1519	2844	2192	2539	3476	3407	2902
2019-09-20	1900-01-02 03:42:26	3183	2316	3107	2308	3536	4121	2472	3770
2019-09-20	1900-01-02 04:02:26	2620	1605	3269	3124	3545	3257	2532	2735
2019-09-20	1900-01-02 04:22:26	3509	2887	2763	2658	3470	2591	3579	2748
2019-09-20	1900-01-02 04:42:26	2473	2193	2432	2102	2633	2259	3219	4132
2019-09-20	1900-01-02 05:02:26	2933	2252	2508	2114	2547	2259	2977	2978
2019-09-20	1900-01-02 05:22:26	3221	2713	1845	3424	2293	3320	3581	2564
2019-09-20	1900-01-02 05:42:26	2051	2946	2917	3487	3146	2490	2505	2571
2019-09-20	1900-01-02 06:02:26	1957	1855	3034	2354	3474	2332	2494	3405
2019-09-20	1900-01-02 06:22:26	3193	1547	3520	2295	3001	2089	2250	2967
2019-09-20	1900-01-02 06:42:26	2185	1587	3001	2899	2197	1828	3675	2501
2019-09-20	1900-01-02 07:02:26	2085	1310	1685	2083	2079	2905	3718	3243
2019-09-20	1900-01-02 07:22:26	1938	1347	1858	1888	2881	1986	3646	3607
2019-09-20	1900-01-02 07:42:26	2002	1369	1895	2198	1798	1827	3310	3302
2019-09-20	1900-01-02 08:02:26	1978	2118	2395	3060	1872	2782	2218	2695
2019-09-20	1900-01-02 08:22:26	1951	1669	1987	2877	2246	1878	2356	2536
2019-09-20	1900-01-02 08:42:26	2591	1308	1836	2589	1962	1975	2615	3694
2019-09-20	1900-01-02 09:02:26	2449	1725	3229	2422	2900	2158	2267	2907
2019-09-20	1900-01-02 09:22:26	2241	2817	1960	2393	1933	2189	2769	2718
2019-09-20	1900-01-02 09:42:26	1991	2595	1823	2698	2187	2917	2947	2744
2019-09-20	1900-01-02 10:02:26	1909	1589	2741	2019	2774	1757	3386	2926
2019-09-20	1900-01-02 10:22:26	1736	1452	2493	1989	2542	1957	2398	2633
2019-09-20	1900-01-02 10:42:26	1805	1447	1539	1876	2510	3301	2587	2328
2019-09-20	1900-01-02 11:02:26	1655	1538	2403	1836	2135	2444	2185	2367
2019-09-20	1900-01-02 11:22:26	2441	2066	1458	1774	1945	2024	3251	2403
2019-09-20	1900-01-02 11:42:26	2346	1343	1561	2851	1894	2041	3109	3747
2019-09-20	1900-01-02 12:02:26	1735	1842	3123	1950	1584	2025	2175	2231
2019-09-20	1900-01-02 12:22:26	1706	1214	2025	2057	2204	2779	2513	2713
2019-09-20	1900-01-02 12:42:26	1745	1427	1829	2867	3092	1752	2373	2239
2019-09-20	1900-01-02 13:02:26	1952	2404	1779	2295	2675	2418	2316	2162
2019-09-20	1900-01-02 13:22:26	1632	1073	3066	2872	2053	1780	2151	2253
2019-09-20	1900-01-02 13:42:26	1832	1318	1725	1723	2629	2017	3106	3430
2019-09-20	1900-01-02 14:02:26	1752	1453	2786	1775	1929	1966	2255	3212
2019-09-20	1900-01-02 14:22:26	2580	2643	3086	2873	1924	2488	2100	2599
2019-09-20	1900-01-02 14:42:26	2170	2114	2953	2118	2564	2756	2225	2496
2019-09-20	1900-01-02 15:02:26	2098	1370	1988	2145	1986	1723	2135	2311
2019-09-20	1900-01-02 15:22:26	1995	1560	1888	2000	2046	1880	2223	3422
2019-09-20	1900-01-02 15:42:26	2535	1753	2026	2029	3042	1889	2239	3471
2019-09-20	1900-01-01 16:02:26	1569	1401	1811	2733	2415	1810	3447	2583

## Sheet: RER
	Groups:	Group 1:	1
Computer	ID#:	310	306	307	798	308	309	312	NT
Date/Clock	BW (g) in:	27.1	30.5	27	24.7	21.4	23	21.8	19.7
Time	BW (g) out:	25.9	27.3	25.4	23	20.5	22.2	20.9	20.6
2019-09-15	17:02:26	0.770006	0.763479	0.775956	0.76097	0.81872	0.770472	0.699187	0.700248
2019-09-15	17:22:26	0.823064	0.808031	0.795224	0.756534	0.78678	0.756924	0.713235	0.701186
2019-09-15	17:42:26	0.760574	0.791801	0.792037	0.731115	0.842863	0.744458	0.678815	0.749763
2019-09-15	18:02:26	0.789378	0.763174	0.727055	0.735782	0.827376	0.713528	0.695925	0.679782
2019-09-15	18:22:26	0.734389	0.754098	0.803816	0.793414	0.846686	0.703116	0.754965	0.677844
2019-09-15	18:42:26	0.752863	0.780566	0.832097	0.775844	0.814358	0.740446	0.759816	0.682468
2019-09-15	19:02:26	0.774376	0.754039	0.78956	0.776623	0.880421	0.728179	0.783567	0.746714
2019-09-15	19:22:26	0.762309	0.760064	0.842777	0.797341	0.89369	0.748907	0.818371	0.720435
2019-09-15	19:42:26	0.797915	0.764246	0.815565	0.745612	0.877848	0.779956	0.82181	0.746882
2019-09-15	20:02:26	0.831318	0.764208	0.811392	0.757102	0.852649	0.777137	0.859352	0.760705
2019-09-15	20:22:26	0.80117	0.764267	0.866479	0.737436	0.829962	0.786152	0.838926	0.800648
2019-09-15	20:42:26	0.863407	0.786804	0.83642	0.798683	0.893879	0.773865	0.84051	0.829845
2019-09-15	21:02:26	0.852734	0.762391	0.804878	0.749752	0.896633	0.795564	0.884191	0.844617
2019-09-15	21:22:26	0.883207	0.760666	0.797468	0.772911	0.876743	0.779025	0.896379	0.818255
2019-09-15	21:42:26	0.945775	0.837996	0.823406	0.781848	0.934647	0.847648	0.886305	0.833264
2019-09-15	22:02:26	0.943166	0.765109	0.801949	0.800831	0.923553	0.827309	0.913664	0.83004
2019-09-15	22:22:26	0.955532	0.775225	0.874615	0.759941	0.908522	0.841049	0.92618	0.840415
2019-09-15	22:42:26	0.952536	0.775459	0.855867	0.857238	0.923338	0.887826	0.937585	0.867039
2019-09-15	23:02:26	0.943404	0.768312	0.847486	0.801992	0.891221	0.882755	0.944756	0.865657
2019-09-15	23:22:26	0.98307	0.761637	0.839719	0.864202	0.900075	0.85473	0.929699	0.843674
2019-09-15	23:42:26	0.951949	0.740606	0.858003	0.841276	0.956919	0.91631	0.900865	0.858062
2019-09-16	1900-01-01 00:02:26	0.955024	0.79477	0.827939	0.847614	0.895854	0.934485	0.912286	0.916989
2019-09-16	1900-01-01 00:22:26	0.989715	0.771107	0.810767	0.837924	0.927454	0.926121	0.907622	0.909044
2019-09-16	1900-01-01 00:42:26	0.975537	0.764111	0.808867	0.815948	0.903846	0.889328	0.890106	0.916272
2019-09-16	1900-01-01 01:02:26	0.958029	0.755723	0.811227	0.822836	0.917138	0.987816	0.895184	0.901955
2019-09-16	1900-01-01 01:22:26	0.966007	0.790404	0.815572	0.828179	0.903037	0.971076	0.878875	0.920088
2019-09-16	1900-01-01 01:42:26	0.979922	0.841515	0.767573	0.834044	0.888842	0.880981	0.851852	0.90004
2019-09-16	1900-01-01 02:02:26	0.97907	0.759763	0.798275	0.869468	0.924635	0.937547	0.893274	0.963627
2019-09-16	1900-01-01 02:22:26	0.995781	0.782959	0.826806	0.859723	0.923856	0.916391	0.984446	0.901062
2019-09-16	1900-01-01 02:42:26	0.99462	0.772434	0.837673	0.86426	0.977008	0.975492	0.941145	0.941745
2019-09-16	1900-01-01 03:02:26	0.991743	0.714524	0.868075	0.885367	0.905034	0.971137	0.930506	0.933068
2019-09-16	1900-01-01 03:22:26	0.969282	0.770682	0.772293	0.872451	0.967815	1.00119	0.972355	0.909482
2019-09-16	1900-01-01 03:42:26	1.00612	0.767972	0.87859	0.872889	0.978927	1.00341	0.97626	0.954152
2019-09-16	1900-01-01 04:02:26	0.967281	0.768527	0.899819	0.872702	0.952354	0.969259	0.950762	0.918339
2019-09-16	1900-01-01 04:22:26	0.99651	0.853768	0.902462	0.934591	0.949003	0.961538	0.951201	0.892464
2019-09-16	1900-01-01 04:42:26	0.987933	0.863435	0.919365	0.909733	0.927807	0.957089	0.972222	0.95404
2019-09-16	1900-01-01 05:02:26	1.00109	0.870151	0.900372	0.916508	0.958929	0.959223	0.988232	0.925751
2019-09-16	1900-01-01 05:22:26	0.982226	0.863659	0.902532	0.899283	0.931507	0.99466	0.920936	0.893687
2019-09-16	1900-01-01 05:42:26	0.985855	0.874824	0.923572	0.9301	0.93327	0.904497	0.992705	0.924566
2019-09-16	1900-01-01 06:02:26	0.941771	0.857715	0.928978	0.900224	0.869176	0.909574	0.927748	0.915569
2019-09-16	1900-01-01 06:22:26	1	0.899801	0.872904	0.949063	0.931034	1.00901	0.949921	0.906294
2019-09-16	1900-01-01 06:42:26	0.974709	0.885417	0.869856	0.889566	0.88221	0.946192	0.982736	0.936967
2019-09-16	1900-01-01 07:02:26	0.972499	0.862069	0.8949	0.874385	0.917395	0.958957	0.959254	0.903402
2019-09-16	1900-01-01 07:22:26	1.00589	0.882027	0.822209	0.931412	0.938263	0.938272	0.926567	0.923971
2019-09-16	1900-01-01 07:42:26	0.946505	0.892625	0.83599	0.946014	0.923354	0.975798	0.97023	0.915698
2019-09-16	1900-01-01 08:02:26	0.923297	0.93735	0.895273	0.916793	0.870758	0.959482	0.928986	0.891725
2019-09-16	1900-01-01 08:22:26	0.958242	0.95473	0.856305	0.934388	0.876697	0.97682	0.968844	0.901751
2019-09-16	1900-01-01 08:42:26	0.945135	0.94528	0.830632	0.963026	0.884177	0.945701	0.973489	0.917482
2019-09-16	1900-01-01 09:02:26	0.913941	0.916442	0.854051	0.915751	0.921068	0.910417	0.938476	0.894977
2019-09-16	1900-01-01 09:22:26	0.917059	0.93033	0.883282	0.862473	0.84172	0.861535	0.87217	0.872123
2019-09-16	1900-01-01 09:42:26	0.878433	0.885502	0.880939	0.910189	0.91912	0.932077	0.93584	0.905352
2019-09-16	1900-01-01 10:02:26	0.926219	0.912186	0.875143	0.887282	0.918176	0.929902	0.928796	0.899574
2019-09-16	1900-01-01 10:22:26	0.853613	0.90086	0.839225	0.868672	0.885759	0.877682	0.97256	0.866138
2019-09-16	1900-01-01 10:42:26	0.81177	0.875429	0.876972	0.841203	0.897448	0.931685	0.93411	0.846778
2019-09-16	1900-01-01 11:02:26	0.841053	0.895822	0.91038	0.841897	0.944554	0.919072	0.906917	0.865315
2019-09-16	1900-01-01 11:22:26	0.836939	0.917109	0.911909	0.85576	0.867162	0.865562	0.903769	0.831132
2019-09-16	1900-01-01 11:42:26	0.850391	0.945783	0.892878	0.884512	0.910371	0.903347	0.923709	0.906353
2019-09-16	1900-01-01 12:02:26	0.85841	0.887816	0.899624	0.853707	0.931848	0.936235	0.970034	0.921031
2019-09-16	1900-01-01 12:22:26	0.90723	0.819163	0.862674	0.879901	0.949871	0.9022	0.89434	0.841263
2019-09-16	1900-01-01 12:42:26	0.94771	0.867925	0.898015	0.886394	0.868473	0.850237	0.873838	0.871008
2019-09-16	1900-01-01 13:02:26	0.899545	0.827546	0.821925	0.880875	0.885889	0.903425	0.823035	0.818146
2019-09-16	1900-01-01 13:22:26	0.915779	0.812689	0.880096	0.905378	0.892322	0.799617	0.926435	0.852476
2019-09-16	1900-01-01 13:42:26	0.921883	0.839327	0.883598	0.882574	0.860692	0.775344	0.921739	0.904274
2019-09-16	1900-01-01 14:02:26	0.89863	0.921942	0.90678	0.849423	0.909961	0.82497	0.847141	0.801962
2019-09-16	1900-01-01 14:22:26	0.926514	0.866871	0.895975	0.806132	0.904636	0.826211	0.851557	0.870422
2019-09-16	1900-01-01 14:42:26	0.927543	0.875825	0.897362	0.82503	0.911909	0.916157	0.902326	0.931103
2019-09-16	1900-01-01 15:02:26	0.912947	0.846154	0.871221	0.836601	0.941533	0.927691	0.879012	0.88355
2019-09-16	1900-01-01 15:22:26	0.935361	0.893725	0.861781	0.894921	0.914146	0.900775	0.878049	0.84056
2019-09-16	1900-01-01 15:42:26	0.983452	0.82634	0.945092	0.864445	0.906891	0.873911	0.90625	0.945968
2019-09-16	1900-01-01 16:02:26	0.982914	0.831971	0.893767	0.851592	0.886389	0.890701	0.892361	0.930922
2019-09-16	1900-01-01 16:22:26	0.956623	0.843769	0.931017	0.86683	0.984271	0.870465	0.851002	0.946091
2019-09-16	1900-01-01 16:42:26	0.924494	0.906956	0.859676	0.796802	0.89742	0.849886	0.889686	0.870943
2019-09-16	1900-01-01 17:02:26	0.93075	0.845931	0.858037	0.807515	0.913295	0.841674	0.815208	0.980839
2019-09-16	1900-01-01 17:22:26	0.914261	0.82293	0.897742	0.804982	0.907755	0.835179	0.820357	0.923044
2019-09-16	1900-01-01 17:42:26	0.973194	0.825475	0.910696	0.849637	0.918478	0.816932	0.905268	0.886762
2019-09-16	1900-01-01 18:02:26	0.929542	0.906587	0.849539	0.857066	0.974946	0.791475	0.998918	0.942516
2019-09-16	1900-01-01 18:22:26	0.928086	0.882294	0.946441	0.887238	0.924718	0.887443	0.939183	0.951751
2019-09-16	1900-01-01 18:42:26	0.934534	0.846975	0.929899	0.87144	0.952214	0.919271	0.930815	0.934543
2019-09-16	1900-01-01 19:02:26	0.967179	0.786385	0.93745	0.909991	0.953878	0.948781	0.96304	0.927036
2019-09-16	1900-01-01 19:22:26	0.971692	0.801196	0.918018	0.899891	0.963925	0.93411	0.950105	0.987248
2019-09-16	1900-01-01 19:42:26	0.975444	0.900031	0.952712	0.871069	0.934579	0.933816	0.962066	0.942444
2019-09-16	1900-01-01 20:02:26	0.960172	0.909091	0.969979	0.911907	0.969064	0.943652	0.966083	0.952364
2019-09-16	1900-01-01 20:22:26	0.960177	0.876278	0.963654	0.873156	0.938684	0.93866	0.941339	0.947146
2019-09-16	1900-01-01 20:42:26	0.983289	0.910381	0.937307	0.880568	0.988528	0.955729	0.91561	0.90929
2019-09-16	1900-01-01 21:02:26	1.01498	0.932416	0.932411	0.880723	0.957113	0.945171	0.975992	0.938891
2019-09-16	1900-01-01 21:22:26	1.00403	0.919409	0.974267	0.87595	0.963636	0.917617	1.02328	0.928757
2019-09-16	1900-01-01 21:42:26	0.980188	0.900187	0.954805	0.906202	0.975439	0.973036	0.963202	0.930773
2019-09-16	1900-01-01 22:02:26	1.00902	0.954653	0.939378	0.834374	0.972136	0.966102	0.991486	0.938636
2019-09-16	1900-01-01 22:22:26	0.988561	0.947848	1.00527	0.893118	0.965543	0.982058	1.01572	0.958191
2019-09-16	1900-01-01 22:42:26	0.968872	0.95633	0.976303	0.939003	0.951423	0.95806	1.00191	0.919435
2019-09-16	1900-01-01 23:02:26	0.995133	0.918835	0.980877	0.917073	0.990942	0.997278	0.978134	0.931955
2019-09-16	1900-01-01 23:22:26	0.99174	0.940698	0.981431	0.875217	0.951102	0.964238	0.943145	0.956779
2019-09-16	1900-01-01 23:42:26	0.986413	0.910742	0.931125	0.883553	0.956422	1.00301	0.90742	0.977842
2019-09-17	1900-01-02 00:02:26	0.996799	0.951822	0.954853	0.914277	0.982836	0.976783	0.938154	0.993645
2019-09-17	1900-01-02 00:22:26	0.95019	0.924377	0.952975	0.924457	0.998534	0.977808	1.02066	0.976002
2019-09-17	1900-01-02 00:42:26	0.942518	0.922455	0.947985	0.891532	0.931827	1.0102	0.95537	0.947387
2019-09-17	1900-01-02 01:02:26	0.964846	0.912343	0.915949	0.90793	0.979253	1.00703	0.92236	0.947157
2019-09-17	1900-01-02 01:22:26	1.02068	0.931361	0.965751	0.929665	0.987373	1.00106	0.942231	0.979757
2019-09-17	1900-01-02 01:42:26	0.967426	0.850949	0.892365	0.938981	1.00673	0.97388	0.95507	0.933471
2019-09-17	1900-01-02 02:02:26	0.99249	0.809172	0.899821	0.874103	0.988021	0.959563	0.923961	0.958904
2019-09-17	1900-01-02 02:22:26	0.990183	0.846386	0.955446	0.923387	0.951391	0.992385	1.00028	0.906012
2019-09-17	1900-01-02 02:42:26	0.983612	0.899623	0.891514	0.918178	0.971457	0.977496	0.97067	0.935586
2019-09-17	1900-01-02 03:02:26	0.970949	0.90694	0.990838	0.864271	0.946335	0.973544	0.939394	0.935343
2019-09-17	1900-01-02 03:22:26	0.951307	0.884572	0.946976	0.890448	0.940747	0.976545	0.976269	0.943878
2019-09-17	1900-01-02 03:42:26	0.971446	0.87521	0.918526	0.918131	0.957028	1.00722	0.972913	0.993936
2019-09-17	1900-01-02 04:02:26	1.00419	0.916945	0.932768	0.892153	0.960124	0.985507	0.934607	0.955812
2019-09-17	1900-01-02 04:22:26	0.987888	0.860634	0.932203	0.880964	0.94047	1.00613	0.948795	0.848592
2019-09-17	1900-01-02 04:42:26	0.985636	0.926357	0.910377	0.891695	0.967404	0.988392	0.914677	0.938314
2019-09-17	1900-01-02 05:02:26	0.950409	0.856635	0.894334	0.888844	0.930738	0.933984	1.01804	0.916094
2019-09-17	1900-01-02 05:22:26	0.945341	0.862944	0.982684	0.923503	0.932159	0.967654	0.992392	0.855576
2019-09-17	1900-01-02 05:42:26	0.960155	0.876923	0.965664	0.891168	0.887378	0.948307	0.957895	0.91445
2019-09-17	1900-01-01 06:02:26	0.962776	0.85086	0.977532	0.921769	0.86445	0.970676	0.944892	0.859473
2019-09-17	1900-01-01 06:22:26	0.934185	0.870303	0.945793	0.871503	0.879843	0.915514	0.92455	0.930978
2019-09-17	1900-01-01 06:42:26	0.947884	0.778312	0.970635	0.895463	0.899098	0.969051	0.92625	0.886899
2019-09-17	1900-01-01 07:02:26	0.913154	0.803395	0.95182	0.855754	0.904571	0.910367	0.916247	0.826519
2019-09-17	1900-01-01 07:22:26	0.86156	0.766294	0.952964	0.861511	0.843565	0.930309	0.908551	0.833197
2019-09-17	1900-01-01 07:42:26	0.915045	0.864785	0.896288	0.828146	0.876179	0.92221	0.978923	0.814655
2019-09-17	1900-01-01 08:02:26	0.876982	0.890353	0.908108	0.828666	0.851482	0.876419	0.975432	0.897221
2019-09-17	1900-01-01 08:22:26	0.915399	0.909091	0.906265	0.885054	0.940381	0.891745	0.889425	0.878498
2019-09-17	1900-01-01 08:42:26	0.898115	0.921529	0.930866	0.88412	0.892755	0.891292	0.931335	0.90337
2019-09-17	1900-01-01 09:02:26	0.891111	0.875072	0.918135	0.835476	0.851193	0.838867	0.922672	0.840747
2019-09-17	1900-01-01 09:22:26	0.97797	0.870214	0.865964	0.904698	0.827648	0.83511	0.880925	0.866524
2019-09-17	1900-01-01 09:42:26	0.880699	0.875475	0.960616	0.788334	0.823432	0.865685	0.845778	0.827802
2019-09-17	1900-01-01 10:02:26	0.822755	0.894699	0.876076	0.853364	0.861287	0.908873	0.808644	0.834105
2019-09-17	1900-01-01 10:22:26	0.848267	0.921906	0.8771	0.799794	0.896748	0.898379	0.821386	0.847984
2019-09-17	1900-01-01 10:42:26	0.811321	0.923906	0.92783	0.80382	0.833554	0.886181	0.815895	0.962505
2019-09-17	1900-01-01 11:02:26	0.773376	0.837172	0.912788	0.864691	0.905871	0.96286	0.85435	0.887372
2019-09-17	1900-01-01 11:22:26	0.827794	0.925714	0.879491	0.83172	0.914252	0.898557	0.9489	0.912041
2019-09-17	1900-01-01 11:42:26	0.863951	0.904268	0.848889	0.806918	0.87666	0.958562	0.949014	0.905855
2019-09-17	1900-01-01 12:02:26	0.851303	0.917136	0.91289	0.789714	0.904222	0.901278	0.924944	0.869549
2019-09-17	1900-01-01 12:22:26	0.861835	0.898012	0.91233	0.828508	0.92493	0.876757	0.909712	0.928089
2019-09-17	1900-01-01 12:42:26	0.789048	0.881677	0.932105	0.824176	0.898191	0.837456	0.902231	0.95451
2019-09-17	1900-01-01 13:02:26	0.8086	0.889924	0.939615	0.855188	0.892017	0.82716	0.834113	0.914998
2019-09-17	1900-01-01 13:22:26	0.830922	0.890787	0.932289	0.828431	0.862944	0.894772	0.890822	0.887199
2019-09-17	1900-01-01 13:42:26	0.886179	0.886755	0.851316	0.837603	0.889522	0.912195	0.939731	0.838106
2019-09-17	1900-01-01 14:02:26	0.91179	0.831164	0.828668	0.763597	0.857673	0.856479	0.951129	0.873953
2019-09-17	1900-01-01 14:22:26	0.900536	0.810811	0.900287	0.830488	0.856907	0.81686	0.953093	0.845376
2019-09-17	1900-01-01 14:42:26	0.947655	0.865084	0.873171	0.851903	0.832778	0.80075	0.882027	0.912084
2019-09-17	1900-01-01 15:02:26	0.911359	0.814462	0.852625	0.786003	0.868739	0.820233	0.841859	0.884823
2019-09-17	1900-01-01 15:22:26	0.857341	0.814759	0.847777	0.82533	0.923794	0.926049	0.877625	0.915234
2019-09-17	1900-01-01 15:42:26	0.903226	0.940375	0.881999	0.87359	0.85098	0.948839	0.82426	0.936486
2019-09-17	1900-01-01 16:02:26	0.910977	0.872071	0.868341	0.887381	0.832645	0.953563	0.827489	0.933917
2019-09-17	1900-01-01 16:22:26	0.930538	0.889638	0.897892	0.779367	0.781891	0.911607	0.910589	0.92728
2019-09-17	1900-01-01 16:42:26	0.906847	0.798317	0.870625	0.794818	0.804274	0.857665	0.90035	0.882262
2019-09-17	1900-01-01 17:02:26	0.930575	0.898793	0.885046	0.774992	0.860601	0.967352	0.95194	0.860459
2019-09-17	1900-01-01 17:22:26	0.913065	0.861292	0.880345	0.780641	0.938694	0.979648	0.94169	0.960212
2019-09-17	1900-01-01 17:42:26	0.892093	0.923445	0.880357	0.722222	0.846968	0.94478	0.982949	0.910884
2019-09-17	1900-01-01 18:02:26	0.876416	0.911926	0.912321	0.794969	0.884941	0.938859	0.955917	0.932469
2019-09-17	1900-01-01 18:22:26	0.87652	0.930392	0.934552	0.807979	0.920477	0.923077	0.947315	0.885816
2019-09-17	1900-01-01 18:42:26	0.905777	0.891119	0.970614	0.844634	0.950836	0.916282	0.950712	0.926528
2019-09-17	1900-01-01 19:02:26	0.988658	0.944586	0.931763	0.877783	0.941277	0.934006	0.984865	0.912767
2019-09-17	1900-01-01 19:22:26	0.957032	0.929921	0.961326	0.867483	0.964266	0.946841	0.972759	0.989401
2019-09-17	1900-01-01 19:42:26	0.9639	0.890728	0.973159	0.86806	0.935783	0.994015	0.969055	0.938336
2019-09-17	1900-01-01 20:02:26	0.963694	0.927556	0.985011	0.902012	0.978558	0.954794	0.983136	0.976225
2019-09-17	1900-01-01 20:22:26	1.00168	0.983943	0.953639	0.925308	1.03466	0.978138	1.02292	0.995539
2019-09-17	1900-01-01 20:42:26	0.937198	0.970683	0.990648	0.928372	0.938652	0.932154	0.981107	0.940514
2019-09-17	1900-01-01 21:02:26	0.99721	0.94432	0.987194	0.886482	0.933755	0.99299	0.979786	0.973262
2019-09-17	1900-01-01 21:22:26	0.969727	0.952201	0.972186	0.92909	0.969769	0.95753	0.976412	0.945455
2019-09-17	1900-01-01 21:42:26	0.991422	0.953538	0.915056	0.93467	0.938094	0.980523	1.00358	0.974476
2019-09-17	1900-01-01 22:02:26	0.971625	0.926819	1.00201	0.894857	0.982539	0.952903	1.00338	0.907827
2019-09-17	1900-01-01 22:22:26	0.997224	0.96007	0.983582	0.912774	0.967672	0.997009	0.93779	0.953856
2019-09-17	1900-01-01 22:42:26	1.01549	0.929025	0.959221	0.945055	0.944503	1.00465	0.995127	0.969659
2019-09-17	1900-01-01 23:02:26	0.998818	0.947939	0.976033	0.952024	0.957666	0.984127	0.991543	0.932188
2019-09-17	1900-01-01 23:22:26	1.01882	0.988501	0.990496	0.944667	0.97724	0.98598	1.01525	0.974785
2019-09-17	1900-01-01 23:42:26	0.96156	0.92429	0.934724	0.92614	0.965278	0.974802	1.00211	0.965309
2019-09-18	1900-01-02 00:02:26	0.988282	0.946446	0.919966	0.864422	0.979803	0.981453	0.989388	0.942529
2019-09-18	1900-01-02 00:22:26	0.977608	0.926591	0.968143	0.913091	0.9544	0.985714	0.973225	0.954523
2019-09-18	1900-01-02 00:42:26	0.968205	0.938033	0.899206	0.89242	0.946203	0.974734	0.95089	0.983603
2019-09-18	1900-01-02 01:02:26	1.00393	0.982605	0.951639	0.83127	0.938366	1.00145	0.966717	0.907854
2019-09-18	1900-01-02 01:22:26	0.92636	0.943695	0.980282	0.855684	0.997135	1.00952	0.967039	0.913534
2019-09-18	1900-01-02 01:42:26	0.987255	0.971193	0.969093	0.838777	0.948454	0.995937	0.990974	0.957447
2019-09-18	1900-01-02 02:02:26	0.982315	0.903826	0.933855	0.790541	0.929936	0.993592	0.97017	0.968458
2019-09-18	1900-01-02 02:22:26	0.98589	0.920984	0.985494	0.823356	0.971318	0.899902	0.987912	0.930398
2019-09-18	1900-01-02 02:42:26	0.976381	0.932508	0.965634	0.837871	0.984737	0.953797	0.949186	0.927806
2019-09-18	1900-01-02 03:02:26	0.974026	0.948648	0.95572	0.837878	0.988531	0.955353	0.94563	0.937934
2019-09-18	1900-01-02 03:22:26	0.999249	0.940844	0.975033	0.83819	0.984405	0.983157	0.969676	0.940155
2019-09-18	1900-01-02 03:42:26	1.01042	0.952658	0.970577	0.792574	0.90334	0.974481	0.910362	0.912877
2019-09-18	1900-01-02 04:02:26	1.01415	0.908479	0.925527	0.808411	0.923014	1.01671	0.887513	0.966002
2019-09-18	1900-01-02 04:22:26	1.00713	0.919786	0.892236	0.787749	0.940024	0.971207	0.917507	0.96247
2019-09-18	1900-01-02 04:42:26	0.987053	0.939096	0.92648	0.834376	0.95609	0.958729	0.957225	0.914267
2019-09-18	1900-01-02 05:02:26	0.986894	0.941056	0.90099	0.86038	0.96702	0.951632	0.966486	0.873681
2019-09-18	1900-01-02 05:22:26	0.963516	0.881933	0.932227	0.859938	0.944444	0.974419	0.962706	0.91435
2019-09-18	1900-01-02 05:42:26	0.962064	0.932937	0.947481	0.830268	0.887985	0.928164	0.909188	0.891014
2019-09-18	1900-01-02 06:02:26	1.00114	0.919847	0.962305	0.829562	0.86984	0.90942	0.921128	0.938259
2019-09-18	1900-01-02 06:22:26	0.939691	0.872535	0.892562	0.929908	1.00668	0.886019	0.851485	0.963042
2019-09-18	1900-01-02 06:42:26	0.907727	0.967262	0.936569	0.888571	0.957143	0.907771	0.793166	0.849063
2019-09-18	1900-01-02 07:02:26	0.904605	0.921368	0.900097	0.834973	0.960918	0.9746	0.790175	0.844195
2019-09-18	1900-01-02 07:22:26	0.890943	0.889012	0.912673	0.806467	0.876997	0.887711	0.839661	0.928594
2019-09-18	1900-01-02 07:42:26	0.840676	0.86454	0.933739	0.858331	0.877133	0.940167	0.95898	0.908072
2019-09-18	1900-01-02 08:02:26	0.903796	0.862692	0.919883	0.880429	0.835554	0.936768	0.929529	0.894858
2019-09-18	1900-01-02 08:22:26	0.882123	0.861312	0.896535	0.88451	0.851922	0.878026	0.900615	0.911351
2019-09-18	1900-01-02 08:42:26	0.860412	0.93425	0.85623	0.881936	0.87781	0.852476	0.857603	0.894999
2019-09-18	1900-01-02 09:02:26	0.846782	0.912651	0.875	0.88474	0.765891	0.786384	0.877918	0.86295
2019-09-18	1900-01-02 09:22:26	0.895093	0.884085	0.859337	0.799381	0.732606	0.813588	0.918851	0.86585
2019-09-18	1900-01-02 09:42:26	0.876024	0.808138	0.823116	0.817778	0.780799	0.79527	0.846337	0.847143
2019-09-18	1900-01-02 10:02:26	0.899381	0.822263	0.793639	0.799778	0.749417	0.843384	0.842105	0.842053
2019-09-18	1900-01-02 10:22:26	0.837262	0.806918	0.802969	0.8055	0.824561	0.765538	0.792762	0.751801
2019-09-18	1900-01-02 10:42:26	0.850199	0.799773	0.816444	0.80523	0.821992	0.810593	0.8347	0.813547
2019-09-18	1900-01-02 11:02:26	0.796509	0.798479	0.809469	0.770004	0.787692	0.899131	0.859644	0.78881
2019-09-18	1900-01-02 11:22:26	0.782011	0.774501	0.800384	0.776258	0.763658	0.786695	0.788218	0.83726
2019-09-18	1900-01-02 11:42:26	0.773564	0.775194	0.820215	0.808413	0.754915	0.820798	0.768439	0.764316
2019-09-18	1900-01-02 12:02:26	0.837865	0.812788	0.829184	0.803187	0.826409	0.923257	0.823857	0.859441
2019-09-18	1900-01-02 12:22:26	0.798748	0.78221	0.837353	0.770461	0.849787	0.884128	0.735156	0.75918
2019-09-18	1900-01-02 12:42:26	0.807514	0.804124	0.858528	0.768595	0.807522	0.84928	0.751678	0.751561
2019-09-18	1900-01-02 13:02:26	0.825751	0.769854	0.818577	0.775629	0.764013	0.826975	0.742057	0.864117
2019-09-18	1900-01-02 13:22:26	0.790465	0.779054	0.796024	0.824432	0.736824	0.795192	0.753045	0.774569
2019-09-18	1900-01-02 13:42:26	0.832939	0.744529	0.823988	0.819571	0.777233	0.819899	0.787023	0.742534
2019-09-18	1900-01-02 14:02:26	0.863092	0.775805	0.75314	0.818414	0.85098	0.907025	0.867004	0.849407
2019-09-18	1900-01-02 14:22:26	0.811084	0.756547	0.78893	0.816308	0.900305	0.891868	0.8883	0.785766
2019-09-18	1900-01-02 14:42:26	0.872499	0.778452	0.812615	0.759878	0.837229	0.851382	0.837233	0.813975
2019-09-18	1900-01-02 15:02:26	0.805415	0.747984	0.860947	0.796468	0.806804	0.841487	0.812593	0.83294
2019-09-18	1900-01-02 15:22:26	0.847349	0.791808	0.873621	0.788189	0.793609	0.89758	0.820207	0.88188
2019-09-18	1900-01-02 15:42:26	0.858676	0.777249	0.840941	0.800598	0.778716	0.891674	0.845438	0.833508
2019-09-18	1900-01-01 16:02:26	0.903444	0.8113	0.857717	0.856525	0.768974	0.873585	0.876672	0.85786
2019-09-18	1900-01-01 16:22:26	0.856562	0.766736	0.841963	0.849037	0.793095	0.840613	0.926581	0.899187
2019-09-18	1900-01-01 16:42:26	0.831052	0.763331	0.790156	0.772102	0.846709	0.839305	0.899841	0.818564
2019-09-18	1900-01-01 17:02:26	0.810784	0.757687	0.817319	0.818316	0.864533	0.898563	0.906806	0.846311
2019-09-18	1900-01-01 17:22:26	0.808045	0.779759	0.797022	0.813889	0.882431	0.850202	0.788674	0.774526
2019-09-18	1900-01-01 17:42:26	0.803491	0.768293	0.831739	0.83179	0.864055	0.832059	0.748	0.781541
2019-09-18	1900-01-01 18:02:26	0.875686	0.771092	0.817658	0.869112	0.927678	0.919251	0.785943	0.803263
2019-09-18	1900-01-01 18:22:26	0.956618	0.787721	0.879527	0.900448	0.884298	0.850054	0.944383	0.804587
2019-09-18	1900-01-01 18:42:26	0.84947	0.79203	0.842803	0.924857	0.921598	0.920895	0.929772	0.832617
2019-09-18	1900-01-01 19:02:26	0.899019	0.753452	0.915755	0.899316	0.887566	0.885939	0.932592	0.866961
2019-09-18	1900-01-01 19:22:26	0.985059	0.763024	0.890319	0.889755	0.94545	0.92564	0.874037	0.865462
2019-09-18	1900-01-01 19:42:26	0.968961	0.783137	0.939642	0.909529	0.926896	0.926533	0.932378	0.922438
2019-09-18	1900-01-01 20:02:26	0.960976	0.790557	0.96688	0.93244	0.938605	0.947384	0.947587	0.938643
2019-09-18	1900-01-01 20:22:26	0.972626	0.792361	0.934783	0.923851	0.967599	0.939282	0.970392	0.917032
2019-09-18	1900-01-01 20:42:26	0.984293	0.797452	0.952977	0.900826	0.951459	0.907099	0.977891	0.998184
2019-09-18	1900-01-01 21:02:26	0.987093	0.765605	0.888738	0.966467	0.964732	0.967273	0.974991	0.983479
2019-09-18	1900-01-01 21:22:26	0.96668	0.770743	0.936119	0.963182	1.01102	0.991295	0.964508	0.922189
2019-09-18	1900-01-01 21:42:26	0.979739	0.84162	0.994083	0.92033	1.01501	0.958998	0.943389	0.941082
2019-09-18	1900-01-01 22:02:26	1.00791	0.797593	0.962445	0.940997	1.00812	0.982215	0.987891	1.00793
2019-09-18	1900-01-01 22:22:26	1.01588	0.840857	0.972374	0.901084	0.932665	0.993859	0.966143	0.981702
2019-09-18	1900-01-01 22:42:26	0.963871	0.84555	0.962944	0.943658	0.962158	0.945492	0.96132	0.961636
2019-09-18	1900-01-01 23:02:26	0.988389	0.872068	0.968768	0.925576	0.965274	0.959042	0.998337	0.967889
2019-09-18	1900-01-01 23:22:26	0.992872	0.887507	0.954702	0.932489	0.95841	0.964085	0.998885	0.979984
2019-09-18	1900-01-01 23:42:26	0.952193	0.848148	0.971089	0.940216	0.995567	0.988831	0.970877	0.939638
2019-09-19	1900-01-02 00:02:26	1.00644	0.897482	0.91907	0.959076	0.986771	0.984585	0.922319	0.967603
2019-09-19	1900-01-02 00:22:26	0.96919	0.883813	0.961026	0.909572	0.94812	0.988814	0.916343	0.971268
2019-09-19	1900-01-02 00:42:26	0.957771	0.891469	0.957816	0.92732	0.969482	0.92996	0.959254	0.960296
2019-09-19	1900-01-02 01:02:26	0.995171	0.90625	1	0.9401	0.976516	1.00408	1.00163	0.994673
2019-09-19	1900-01-02 01:22:26	0.985258	0.936061	0.946392	0.915207	0.970518	0.963462	0.996839	0.966427
2019-09-19	1900-01-02 01:42:26	0.983732	0.914504	0.953435	0.935826	0.938069	0.966381	0.978249	0.950668
2019-09-19	1900-01-02 02:02:26	0.993845	0.883011	0.929919	0.905447	0.988072	0.974723	0.997981	0.904977
2019-09-19	1900-01-02 02:22:26	0.991921	0.913636	0.899131	0.913532	0.989414	0.984905	0.911211	0.946403
2019-09-19	1900-01-02 02:42:26	0.983482	0.974556	0.94761	0.95005	0.933731	1.00964	0.905769	0.960891
2019-09-19	1900-01-02 03:02:26	0.981595	0.911801	0.8985	0.934019	0.972678	0.982469	0.907769	0.931131
2019-09-19	1900-01-02 03:22:26	0.981643	0.878101	0.957558	0.92984	0.961016	0.966667	0.884499	0.961964
2019-09-19	1900-01-02 03:42:26	0.970588	0.93777	0.978195	0.936538	0.962925	0.976612	0.904909	0.918372
2019-09-19	1900-01-02 04:02:26	0.921266	0.894224	0.920243	0.889397	0.977711	1.00164	0.924039	0.94695
2019-09-19	1900-01-02 04:22:26	0.965686	0.941119	0.951365	0.930286	0.995225	1.00144	0.938545	0.971193
2019-09-19	1900-01-02 04:42:26	0.972272	0.969112	0.924402	0.90578	0.967764	1.02377	0.955631	0.925122
2019-09-19	1900-01-02 05:02:26	0.988164	0.966182	0.966797	0.929994	0.965714	0.991764	0.928444	0.937405
2019-09-19	1900-01-02 05:22:26	0.951794	0.94339	0.969336	0.927047	0.958226	0.994852	0.989102	0.953808
2019-09-19	1900-01-02 05:42:26	0.984899	0.927481	0.968525	0.885449	0.941967	0.977706	0.935791	0.921157
2019-09-19	1900-01-02 06:02:26	0.974856	0.935132	0.981481	0.926453	0.938892	1.00383	0.895864	0.961735
2019-09-19	1900-01-02 06:22:26	0.967623	0.950242	0.997354	0.8577	0.887974	0.968565	0.876929	0.956817
2019-09-19	1900-01-02 06:42:26	0.967161	0.961326	0.979012	0.895755	0.8766	0.937429	0.854242	0.981388
2019-09-19	1900-01-02 07:02:26	0.985281	0.951911	0.924407	0.882004	0.899728	0.973564	0.820567	0.937795
2019-09-19	1900-01-02 07:22:26	0.998197	0.91689	0.945923	0.934075	0.863834	0.924177	0.874156	0.954786
2019-09-19	1900-01-02 07:42:26	0.917869	0.952381	0.918631	0.872127	0.808777	0.91239	0.920798	0.924918
2019-09-19	1900-01-02 08:02:26	0.966354	0.932248	0.872501	0.876466	0.810558	0.929864	0.87286	0.845461
2019-09-19	1900-01-02 08:22:26	0.974247	0.906697	0.914741	0.862462	0.801051	0.901913	0.847348	0.876412
2019-09-19	1900-01-02 08:42:26	0.94993	0.887218	0.900958	0.825328	0.804688	0.866492	0.830067	0.909091
2019-09-19	1900-01-02 09:02:26	0.903523	0.879979	0.887324	0.860487	0.761392	0.88214	0.797679	0.901034
2019-09-19	1900-01-02 09:22:26	0.886593	0.859826	0.902425	0.883816	0.787614	0.824835	0.786109	0.89104
2019-09-19	1900-01-02 09:42:26	0.903639	0.856793	0.902783	0.893944	0.813435	0.825417	0.755615	0.902129
2019-09-19	1900-01-02 10:02:26	0.874544	0.830586	0.804612	0.902919	0.798202	0.867343	0.810277	0.851032
2019-09-19	1900-01-02 10:22:26	0.821906	0.793449	0.814872	0.827705	0.736676	0.861119	0.786642	0.864761
2019-09-19	1900-01-02 10:42:26	0.843162	0.794889	0.786965	0.81204	0.721376	0.833119	0.751916	0.761522
2019-09-19	1900-01-02 11:02:26	0.795858	0.760098	0.816301	0.789922	0.745968	0.806287	0.775525	0.808183
2019-09-19	1900-01-02 11:22:26	0.820466	0.797388	0.79435	0.758031	0.762513	0.867061	0.768045	0.787563
2019-09-19	1900-01-02 11:42:26	0.869833	0.835931	0.795946	0.822322	0.794872	0.91232	0.812632	0.784554
2019-09-19	1900-01-02 12:02:26	0.773962	0.80962	0.799454	0.743745	0.738076	0.84352	0.846815	0.76995
2019-09-19	1900-01-02 12:22:26	0.816879	0.771347	0.793468	0.733584	0.718964	0.820887	0.807678	0.748831
2019-09-19	1900-01-02 12:42:26	0.773506	0.77614	0.796267	0.765966	0.78735	0.849344	0.818522	0.873881
2019-09-19	1900-01-02 13:02:26	0.742363	0.773529	0.907601	0.787709	0.880878	0.951281	0.801301	0.830383
2019-09-19	1900-01-02 13:22:26	0.77137	0.781076	0.900699	0.766004	0.823777	0.925631	0.791874	0.778264
2019-09-19	1900-01-02 13:42:26	0.797245	0.739454	0.900841	0.745256	0.780663	0.875737	0.755897	0.791797
2019-09-19	1900-01-02 14:02:26	0.755712	0.792403	0.921209	0.843162	0.739802	0.780882	0.758921	0.82719
2019-09-19	1900-01-02 14:22:26	0.743798	0.724615	0.908253	0.887045	0.812622	0.867608	0.790531	0.822166
2019-09-19	1900-01-02 14:42:26	0.755038	0.785269	0.880301	0.843711	0.921699	0.798822	0.844444	0.716279
2019-09-19	1900-01-02 15:02:26	0.773305	0.710186	0.86631	0.802835	0.889996	0.74813	0.867957	0.778202
2019-09-19	1900-01-02 15:22:26	0.882087	0.747961	0.89404	0.802485	0.956299	0.791219	0.871542	0.785815
2019-09-19	1900-01-02 15:42:26	0.938811	0.767366	0.863273	0.80607	0.869183	0.824162	0.804619	0.758993
2019-09-19	1900-01-01 16:22:26	0.901995	0.784689	0.861244	0.800235	0.850359	0.873409	0.737123	0.800495
2019-09-19	1900-01-01 16:42:26	0.935207	0.848401	0.936291	0.868043	0.85258	0.917933	0.817784	0.78968
2019-09-19	1900-01-01 17:02:26	0.834697	0.833333	0.865049	0.872826	0.844137	0.951627	0.835165	0.841124
2019-09-19	1900-01-01 17:22:26	0.880465	0.868143	0.851002	0.878264	0.8751	0.899539	0.840646	0.787321
2019-09-19	1900-01-01 17:42:26	0.844042	0.859117	0.804366	0.88273	0.784281	0.863663	0.815385	0.783203
2019-09-19	1900-01-01 18:02:26	0.804684	0.846805	0.821496	0.887563	0.838439	0.799759	0.866154	0.794544
2019-09-19	1900-01-01 18:22:26	0.795167	0.852828	0.844874	0.909512	0.831423	0.85499	0.870896	0.804747
2019-09-19	1900-01-01 18:42:26	0.833811	0.804106	0.897098	0.948351	0.919706	0.898562	0.849804	0.85485
2019-09-19	1900-01-01 19:02:26	0.881511	0.813687	0.929572	0.94829	0.854363	0.84621	0.95023	0.788806
2019-09-19	1900-01-01 19:22:26	0.943865	0.806786	0.938187	0.95495	0.934211	0.830326	0.972737	0.904206
2019-09-19	1900-01-01 19:42:26	0.927458	0.778938	0.929685	0.91809	0.95466	0.918939	0.934579	0.885694
2019-09-19	1900-01-01 20:02:26	0.968051	0.797735	0.908561	0.915838	0.908801	0.950589	0.969468	0.950322
2019-09-19	1900-01-01 20:22:26	0.940129	0.886801	0.951279	0.963372	0.912459	0.944625	0.991178	0.919988
2019-09-19	1900-01-01 20:42:26	0.92608	0.861796	0.981353	0.957298	0.964663	0.950891	0.958455	0.953728
2019-09-19	1900-01-01 21:02:26	0.975146	0.893491	0.97326	0.951763	0.906429	0.939752	0.914163	0.939037
2019-09-19	1900-01-01 21:22:26	0.959901	0.836231	0.961438	0.939642	0.950038	0.989793	0.973854	0.965146
2019-09-19	1900-01-01 21:42:26	0.985046	0.872034	0.983623	0.944811	0.995287	1.02867	0.993752	0.928491
2019-09-19	1900-01-01 22:02:26	0.961883	0.918724	0.95614	0.954156	0.953388	0.96234	0.957447	0.971867
2019-09-19	1900-01-01 22:22:26	0.965864	0.885928	0.977409	0.960548	0.979209	0.993187	0.955571	0.945996
2019-09-19	1900-01-01 22:42:26	0.960321	0.906441	0.930466	0.90748	0.921782	0.998245	0.926815	0.929445
2019-09-19	1900-01-01 23:02:26	0.998974	0.961897	0.932183	0.93517	0.911521	1.00109	0.940041	0.932977
2019-09-19	1900-01-01 23:22:26	0.984273	0.958624	0.973626	0.922801	0.945581	0.96942	1.00428	0.99009
2019-09-19	1900-01-01 23:42:26	0.977173	0.939439	0.913548	0.955672	0.947299	1.01381	0.941176	0.982266
2019-09-20	1900-01-02 00:02:26	0.992498	0.953362	0.959323	0.960982	0.99109	1.02086	0.97021	0.984204
2019-09-20	1900-01-02 00:22:26	0.984962	0.948393	0.974518	0.911371	0.970814	0.969456	0.986425	1.01648
2019-09-20	1900-01-02 00:42:26	0.972169	0.934008	0.936928	0.947209	0.923218	0.985027	0.984731	0.993476
2019-09-20	1900-01-02 01:02:26	0.987586	0.941531	0.909491	0.903887	0.947646	0.989199	0.977409	0.94533
2019-09-20	1900-01-02 01:22:26	0.977225	0.977149	0.927331	0.900929	0.925844	1.00813	0.974436	0.963614
2019-09-20	1900-01-02 01:42:26	0.980574	0.927656	0.978321	0.891247	0.967149	1.00307	0.987328	0.996423
2019-09-20	1900-01-02 02:02:26	0.992484	0.951481	0.985304	0.958219	0.937174	0.977557	0.971398	0.959596
2019-09-20	1900-01-02 02:22:26	0.98422	0.957119	0.941928	0.897446	0.939217	0.977494	0.991554	0.9546
2019-09-20	1900-01-02 02:42:26	0.969032	0.94971	0.962713	0.867988	0.926543	0.960247	0.971706	0.965147
2019-09-20	1900-01-02 03:02:26	1.03238	1.00479	0.940674	0.883475	0.936585	0.991684	1.01757	0.950034
2019-09-20	1900-01-02 03:22:26	0.998878	0.958965	0.972308	0.862992	0.906786	0.997131	1.00918	0.923616
2019-09-20	1900-01-02 03:42:26	1.01016	0.995701	0.984162	0.888376	0.932244	1.01653	0.938497	0.97973
2019-09-20	1900-01-02 04:02:26	1.00306	0.963385	0.974367	0.937013	0.928253	1.01149	0.965675	0.922117
2019-09-20	1900-01-02 04:22:26	0.991523	0.975997	1.00729	0.926778	0.997987	0.979214	1.02111	0.891918
2019-09-20	1900-01-02 04:42:26	0.979018	0.914131	0.925771	0.921526	0.907305	0.914575	0.94593	0.926873
2019-09-20	1900-01-02 05:02:26	0.975066	0.937162	0.970964	0.877907	0.920492	0.988621	0.964992	0.974795
2019-09-20	1900-01-02 05:22:26	0.979027	0.955618	0.972588	0.918455	0.932872	0.986627	0.986773	0.908575
2019-09-20	1900-01-02 05:42:26	0.96974	0.981019	0.975259	0.917149	0.880739	0.954755	0.938554	0.900525
2019-09-20	1900-01-02 06:02:26	0.941318	0.936396	0.98924	0.922414	0.869587	0.965232	0.95082	0.905344
2019-09-20	1900-01-02 06:22:26	0.97526	1.04386	0.976151	0.890225	0.906099	0.968026	0.981675	0.966764
2019-09-20	1900-01-02 06:42:26	0.970249	0.974816	0.965883	0.932154	0.897101	0.981213	0.927562	0.971262
2019-09-20	1900-01-02 07:02:26	0.946866	0.917367	0.893425	0.904865	0.846843	0.944715	0.963212	0.898587
2019-09-20	1900-01-02 07:22:26	0.914151	0.951943	0.97584	0.884309	0.826686	0.883452	0.967622	0.997787
2019-09-20	1900-01-02 07:42:26	0.890569	0.986311	0.955141	0.850949	0.825907	0.89823	0.965578	0.920803
2019-09-20	1900-01-02 08:02:26	0.940561	1.00857	0.958767	0.882607	0.794904	0.890525	0.990621	0.940007
2019-09-20	1900-01-02 08:22:26	0.906599	0.981188	0.935059	0.916242	0.749666	0.855581	0.882728	0.914863
2019-09-20	1900-01-02 08:42:26	0.926019	0.94714	0.990291	0.890915	0.800163	0.853132	0.872248	0.942587
2019-09-20	1900-01-02 09:02:26	0.898386	0.956208	0.875542	0.944986	0.789116	0.789608	0.923046	0.936232
2019-09-20	1900-01-02 09:22:26	0.923743	0.902885	0.888486	0.879133	0.777554	0.809242	0.875435	0.862036
2019-09-20	1900-01-02 09:42:26	0.8649	0.957565	0.947505	0.926829	0.807905	0.874925	0.867786	0.861809
2019-09-20	1900-01-02 10:02:26	0.859136	0.997489	0.880218	0.850463	0.789414	0.819114	0.950857	0.885593
2019-09-20	1900-01-02 10:22:26	0.832215	0.971888	0.925046	0.817173	0.761306	0.769564	0.903882	0.888327
2019-09-20	1900-01-02 10:42:26	0.810507	0.97049	0.888055	0.876636	0.771595	0.822372	0.899201	0.882487
2019-09-20	1900-01-02 11:02:26	0.805353	0.940673	0.877327	0.807388	0.758168	0.904181	0.803014	0.840853
2019-09-20	1900-01-02 11:22:26	0.831403	0.947272	0.816349	0.820157	0.726017	0.914596	0.927532	0.817903
2019-09-20	1900-01-02 11:42:26	0.874069	0.881812	0.808389	0.88458	0.750694	0.9051	0.939275	0.918382
2019-09-20	1900-01-02 12:02:26	0.846341	0.917788	0.821842	0.877983	0.734353	0.834707	0.889935	0.930747
2019-09-20	1900-01-02 12:22:26	0.835865	0.838398	0.867238	0.852819	0.755312	0.885596	0.886107	0.870388
2019-09-20	1900-01-02 12:42:26	0.793904	0.863279	0.890458	0.88982	0.790187	0.826025	0.809621	0.829874
2019-09-20	1900-01-02 13:02:26	0.827469	0.859185	0.877652	0.882014	0.840931	0.79723	0.818664	0.886792
2019-09-20	1900-01-02 13:22:26	0.825076	0.873068	0.911144	0.8961	0.816627	0.834897	0.799628	0.831979
2019-09-20	1900-01-02 13:42:26	0.835385	0.869393	0.936482	0.797316	0.789964	0.74676	0.859673	0.854722
2019-09-20	1900-01-02 14:02:26	0.783192	0.847725	0.876928	0.768731	0.790898	0.751242	0.854814	0.871642
2019-09-20	1900-01-02 14:22:26	0.859713	0.866273	0.905782	0.821561	0.7696	0.784363	0.812379	0.866333
2019-09-20	1900-01-02 14:42:26	0.865231	0.895763	0.959078	0.829612	0.729445	0.831874	0.817714	0.831723
2019-09-20	1900-01-02 15:02:26	0.923009	0.975089	0.953477	0.835606	0.748869	0.87953	0.792796	0.817474
2019-09-20	1900-01-02 15:22:26	0.890625	0.971963	0.927308	0.817327	0.727337	0.773026	0.774295	0.874521
2019-09-20	1900-01-02 15:42:26	0.908928	0.889848	0.921328	0.770019	0.771885	0.841051	0.772868	0.928075
2019-09-20	1900-01-01 16:02:26	0.832361	0.928429	0.85344	0.853529	0.838542	0.777826	0.892312	0.905998

## Sheet: food intake
	Groups:	Group 1:	1
Computer	ID#:	310	306	307	798	308	309	312	NT
Date/Clock	BW (g) in:	27.1	30.5	27	24.7	21.4	23	21.8	19.7
Time	BW (g) out:	25.9	27.3	25.4	23	20.5	22.2	20.9	20.6
2019-09-15	17:02:26	0.03				0.05	0.01	0.05
2019-09-15	17:22:26	0.06	0.07	0.07		0.03	0.02		0
2019-09-15	17:42:26	0.02	0.02	0.04	0.11	0.03	0.01		0
2019-09-15	18:02:26	0.01		0	0.03	0.04	0	0	0.01
2019-09-15	18:22:26		0	0.02	0.13	0.02		0.04	0
2019-09-15	18:42:26	0	0	0.06	0.04	0.06	0.01	0.06	0.01
2019-09-15	19:02:26		0.02	0.01	0.02	0.06	0.06	0.11	0.02
2019-09-15	19:22:26	0.02	0	0.02	0.02	0.08	0	0.07	0
2019-09-15	19:42:26	0.11	0	0.05		0.05		0.08	0
2019-09-15	20:02:26	0.09	0.04	0.02	0.1	0.03	0.02	0.08	0.09
2019-09-15	20:22:26	0.05	0	0.07	0.05	0.1	0.08	0.06	0.17
2019-09-15	20:42:26	0.07	0.01	0.03	0.04	0.04		0.07	0.07
2019-09-15	21:02:26	0.06	0.03	0	0.05	0.07	0.13	0.06	0.03
2019-09-15	21:22:26	0.1	0.02	0.02		0.11	0.07	0.14	0.02
2019-09-15	21:42:26	0.13	0	0.11	0.07	0.08	0.06	0	0.07
2019-09-15	22:02:26	0.17	0.03	0.05	0	0.13	0	0.1	0.05
2019-09-15	22:22:26	0.22	0.02	0.05	0.04	0.01	0.08	0.17	0.03
2019-09-15	22:42:26	0.01	0.04	0.03	0.07	0	0.1	0.09	0.07
2019-09-15	23:02:26	0.07	0.04	0.02	0.11	0.1	0.17	0.04	0.11
2019-09-15	23:22:26	0.07	0.01	0.06		0.06	0.03	0.02	0.07
2019-09-15	23:42:26	0.1		0.04	0	0.12	0	0.11	0.03
2019-09-16	1900-01-01 00:02:26	0.03	0	0	0	0.04	0.21	0.09	0.1
2019-09-16	1900-01-01 00:22:26	0.13	0.03	0.03	0.08	0	0.13	0.02	0.2
2019-09-16	1900-01-01 00:42:26	0.12	0.04	0.03	0	0.03	0	0.04	0.1
2019-09-16	1900-01-01 01:02:26	0.11	0.03	0.03	0.05	0.05	0.27	0.06	0.16
2019-09-16	1900-01-01 01:22:26	0.11	0.02	0.03	0	0.12	0.14	0
2019-09-16	1900-01-01 01:42:26	0.13	0.01	0.01	0.14	0	0.09	0	0.04
2019-09-16	1900-01-01 02:02:26	0.05	0.02	0.05		0.09	0.14	0.18	0
2019-09-16	1900-01-01 02:22:26			0.25	0.07	0.08	0	0.28	0.04
2019-09-16	1900-01-01 02:42:26	0.04	0	0.01	0.03	0.17	0	0.2	0.1
2019-09-16	1900-01-01 03:02:26	0		0	0.17	0.09	0.16	0.11	0.12
2019-09-16	1900-01-01 03:22:26	0.03	0	0	0.01	0.02	0.01	0.11	0.1
2019-09-16	1900-01-01 03:42:26	0.15	0	0.07	0.14	0	0.27	0.01	0.1
2019-09-16	1900-01-01 04:02:26	0.23	0.16	0.12	0.05	0.17	0.11	0.02	0.02
2019-09-16	1900-01-01 04:22:26	0.08	0.05	0.09	0.09	0.17	0	0	0
2019-09-16	1900-01-01 04:42:26	0	0.06		0.08		0	0.21
2019-09-16	1900-01-01 05:02:26		0.22	0.26	0		0.03	0.13	0.01
2019-09-16	1900-01-01 05:22:26	0.01	0.01	0	0.06	0.08	0.21		0.11
2019-09-16	1900-01-01 05:42:26	0.21		0	0.19	0	0	0.12	0.07
2019-09-16	1900-01-01 06:02:26	0.02	0.04		0.05	0	0.15	0.12	0.01
2019-09-16	1900-01-01 06:22:26	0.06	0.11	0.05	0.11		0	0.07
2019-09-16	1900-01-01 06:42:26	0.04	0.06	0	0.07	0	0		0.13
2019-09-16	1900-01-01 07:02:26	0	0	0	0	0.07	0	0.06	0.07
2019-09-16	1900-01-01 07:22:26	0	0	0			0	0.11	0.05
2019-09-16	1900-01-01 07:42:26	0.09	0.04	0.05	0.14	0.14	0	0	0
2019-09-16	1900-01-01 08:02:26	0	0.2	0.13	0.02	0	0.16	0	0
2019-09-16	1900-01-01 08:22:26	0	0	0	0	0	0	0.13
2019-09-16	1900-01-01 08:42:26	0	0		0.05	0.01		0	0
2019-09-16	1900-01-01 09:02:26		0	0	0.07	0.15	0	0	0.1
2019-09-16	1900-01-01 09:22:26	0	0	0.07	0	0	0.02		0
2019-09-16	1900-01-01 09:42:26	0	0	0.01			0.03	0	0.13
2019-09-16	1900-01-01 10:02:26		0		0.01	0	0	0.06
2019-09-16	1900-01-01 10:22:26	0	0.16	0	0	0.16	0.15	0	0.03
2019-09-16	1900-01-01 10:42:26	0	0.1	0.23	0		0	0
2019-09-16	1900-01-01 11:02:26	0	0	0	0	0.08	0		0
2019-09-16	1900-01-01 11:22:26		0	0	0.13	0.04	0.13	0	0.01
2019-09-16	1900-01-01 11:42:26	0	0	0		0	0	0.14	0.15
2019-09-16	1900-01-01 12:02:26	0.12	0	0.03	0	0.01	0		0.14
2019-09-16	1900-01-01 12:22:26	0.27	0	0	0.08	0.04	0	0	0
2019-09-16	1900-01-01 12:42:26	0.07	0	0	0.12	0		0
2019-09-16	1900-01-01 13:02:26	0	0	0	0	0.03	0	0.09	0
2019-09-16	1900-01-01 13:22:26	0	0	0.16	0	0.01	0	0.08	0
2019-09-16	1900-01-01 13:42:26	0	0.09	0.04		0	0	0	0.01
2019-09-16	1900-01-01 14:02:26	0	0.09	0	0.07	0.27	0	0	0
2019-09-16	1900-01-01 14:22:26	0.11	0	0	0	0	0.1		0.04
2019-09-16	1900-01-01 14:42:26	0.18	0	0	0.04		0.13	0	0.16
2019-09-16	1900-01-01 15:02:26	0.01	0	0	0	0	0	0.09	0
2019-09-16	1900-01-01 15:22:26	0	0	0.18	0.13	0			0
2019-09-16	1900-01-01 15:42:26	0	0	0	0.03	0	0	0.09	0.01
2019-09-16	1900-01-01 16:02:26	0.09	0.01	0		0.16	0.01	0	0.14
2019-09-16	1900-01-01 16:22:26	0	0.12	0	0.01	0.09	0.1	0	0
2019-09-16	1900-01-01 16:42:26	0	0	0.03	0.09	0.02	0.04	0.05	0.16
2019-09-16	1900-01-01 17:02:26	0.01	0.01	0		0	0	0	0.12
2019-09-16	1900-01-01 17:22:26	0.08	0	0.17	0.07	0.03	0	0	0
2019-09-16	1900-01-01 17:42:26	0.03	0	0.05	0.04	0.09	0	0.35	0
2019-09-16	1900-01-01 18:02:26	0.03	0.12	0	0.05	0.08	0	0	0.16
2019-09-16	1900-01-01 18:22:26	0.07	0	0.17		0.17	0.32	0.2
2019-09-16	1900-01-01 18:42:26	0.29		0.21	0.12	0.19		0	0
2019-09-16	1900-01-01 19:02:26	0.04	0	0	0.04			0.05	0.08
2019-09-16	1900-01-01 19:22:26	0.13	0.09	0	0.06	0.05	0.06	0.09	0.08
2019-09-16	1900-01-01 19:42:26	0.15	0.15	0.11	0.03	0.1	0.09	0.2	0.12
2019-09-16	1900-01-01 20:02:26	0.32	0.06	0	0.05	0.15	0.15	0.18	0.04
2019-09-16	1900-01-01 20:22:26	0.3	0	0	0.05			0	0.11
2019-09-16	1900-01-01 20:42:26	0.14	0.08	0.23	0.06	0.25	0.18		0.11
2019-09-16	1900-01-01 21:02:26		0.11	0	0.16		0.13	0.08	0.08
2019-09-16	1900-01-01 21:22:26	0	0.14	0	0	0	0.01	0.12	0.07
2019-09-16	1900-01-01 21:42:26	0.07	0.09	0.15	0.03	0.12	0.14	0.03	0.09
2019-09-16	1900-01-01 22:02:26		0	0		0.12	0.1	0.09	0.08
2019-09-16	1900-01-01 22:22:26	0.01	0	0	0.03	0	0.16	0.08	0.06
2019-09-16	1900-01-01 22:42:26	0.13	0.11	0.19	0.06	0.03		0	0.16
2019-09-16	1900-01-01 23:02:26	0.08		0.18	0.11	0.22	0.28	0.24	0.02
2019-09-16	1900-01-01 23:22:26	0.24	0		0.09		0.03	0.05	0
2019-09-16	1900-01-01 23:42:26	0.14				0	0	0.14	0.15
2019-09-17	1900-01-02 00:02:26	0.14	0.08	0		0.17	0.17	0.13	0.14
2019-09-17	1900-01-02 00:22:26		0.19	0.16	0.06	0.12	0	0	0
2019-09-17	1900-01-02 00:42:26	0	0.02		0.09	0	0.02		0.06
2019-09-17	1900-01-02 01:02:26	0					0.19	0.13	0.06
2019-09-17	1900-01-02 01:22:26	0	0	0	0.23	0	0.28	0	0.1
2019-09-17	1900-01-02 01:42:26	0.16				0.12	0.09	0	0.1
2019-09-17	1900-01-02 02:02:26	0.21		0.04	0	0.13	0
2019-09-17	1900-01-02 02:22:26	0.04	0.13	0.16	0	0		0.17	0.1
2019-09-17	1900-01-02 02:42:26	0	0.14	0.15	0.07	0.28	0	0.05	0.09
2019-09-17	1900-01-02 03:02:26	0.08		0	0.07		0.05	0.18
2019-09-17	1900-01-02 03:22:26		0		0	0	0.34	0.05	0.1
2019-09-17	1900-01-02 03:42:26	0	0.02		0.1	0		0.12	0.05
2019-09-17	1900-01-02 04:02:26	0.19		0.05		0	0.19	0.1	0.07
2019-09-17	1900-01-02 04:22:26		0	0.18	0	0.07	0.27		0
2019-09-17	1900-01-02 04:42:26	0.17	0.2	0.14	0.17	0.11	0	0	0.12
2019-09-17	1900-01-02 05:02:26	0			0.09		0		0
2019-09-17	1900-01-02 05:22:26	0		0	0.12	0	0	0.29	0
2019-09-17	1900-01-02 05:42:26	0.13	0.12	0.17	0.06	0	0	0	0
2019-09-17	1900-01-01 06:02:26	0.15	0	0.11		0	0	0.12
2019-09-17	1900-01-01 06:22:26		0		0	0.23	0	0	0.14
2019-09-17	1900-01-01 06:42:26	0		0	0.08	0	0	0.02	0
2019-09-17	1900-01-01 07:02:26	0	0	0	0	0		0	0.01
2019-09-17	1900-01-01 07:22:26	0	0	0	0	0	0	0.06	0
2019-09-17	1900-01-01 07:42:26	0	0.33		0.02	0	0	0.09	0
2019-09-17	1900-01-01 08:02:26	0	0	0.17		0	0	0.08	0.1
2019-09-17	1900-01-01 08:22:26	0	0	0.02	0.17	0.14	0		0.09
2019-09-17	1900-01-01 08:42:26	0	0	0	0		0	0.1
2019-09-17	1900-01-01 09:02:26	0.09	0	0		0		0	0
2019-09-17	1900-01-01 09:22:26	0	0.06			0	0	0	0.1
2019-09-17	1900-01-01 09:42:26	0.01	0.06	0			0	0
2019-09-17	1900-01-01 10:02:26	0	0.01	0	0	0.08	0.17		0
2019-09-17	1900-01-01 10:22:26	0	0	0	0	0.08	0	0	0.1
2019-09-17	1900-01-01 10:42:26	0		0.12	0.03			0	0.04
2019-09-17	1900-01-01 11:02:26	0	0	0	0.11	0.12	0.32	0	0.08
2019-09-17	1900-01-01 11:22:26	0.01	0.3		0	0		0.31	0
2019-09-17	1900-01-01 11:42:26	0.13	0	0	0.01	0	0	0	0
2019-09-17	1900-01-01 12:02:26	0	0	0.28	0.02	0.15	0	0.08	0
2019-09-17	1900-01-01 12:22:26	0		0.01	0	0.09	0	0	0.12
2019-09-17	1900-01-01 12:42:26	0	0		0.05		0		0.07
2019-09-17	1900-01-01 13:02:26	0	0.01	0	0.11	0	0.01	0	0
2019-09-17	1900-01-01 13:22:26	0	0	0	0	0	0.14	0	0
2019-09-17	1900-01-01 13:42:26	0.14	0	0.01	0	0	0	0.21	0
2019-09-17	1900-01-01 14:02:26	0.05	0	0	0	0	0	0.05	0
2019-09-17	1900-01-01 14:22:26	0	0.01	0	0.08	0	0		0.01
2019-09-17	1900-01-01 14:42:26	0	0	0	0		0	0	0.13
2019-09-17	1900-01-01 15:02:26	0.04	0	0	0.01	0.17	0	0
2019-09-17	1900-01-01 15:22:26	0	0.09	0.11	0.01	0	0.23	0	0.06
2019-09-17	1900-01-01 15:42:26	0.01	0.18	0	0.12	0	0	0	0.15
2019-09-17	1900-01-01 16:02:26	0.11	0	0	0		0	0	0
2019-09-17	1900-01-01 16:22:26	0.21	0	0	0	0	0	0.29	0
2019-09-17	1900-01-01 16:42:26	0.03	0.18	0.13		0.06		0.05	0.04
2019-09-17	1900-01-01 17:02:26	0.01	0.04	0		0.1	0.23	0.1	0.06
2019-09-17	1900-01-01 17:22:26	0	0.13	0		0.15		0	0.17
2019-09-17	1900-01-01 17:42:26	0.04	0.09	0.29		0	0	0	0.01
2019-09-17	1900-01-01 18:02:26	0	0	0.01	0.04	0	0	0.17	0.07
2019-09-17	1900-01-01 18:22:26	0	0	0.12	0.05	0.14	0.16	0	0
2019-09-17	1900-01-01 18:42:26	0.25	0.22	0	0.11	0.21	0	0.17	0.22
2019-09-17	1900-01-01 19:02:26	0.16	0.02	0.15	0.12	0	0.11	0.26	0.02
2019-09-17	1900-01-01 19:22:26	0.14	0.02	0.2	0.06	0.11	0	0.02	0.09
2019-09-17	1900-01-01 19:42:26	0.24	0.15	0.05	0	0.19	0.24	0.11	0.11
2019-09-17	1900-01-01 20:02:26	0.17	0.18	0.1	0.19	0.04	0.04	0	0.09
2019-09-17	1900-01-01 20:22:26	0.08	0	0		0.23	0.14	0	0.13
2019-09-17	1900-01-01 20:42:26	0.02	0.06	0.19	0.19		0	0.31	0.19
2019-09-17	1900-01-01 21:02:26	0.19	0.2	0.19		0	0.21		0.2
2019-09-17	1900-01-01 21:22:26	0.21	0	0	0.17	0.25	0	0.08	0
2019-09-17	1900-01-01 21:42:26	0.06	0.26		0.05		0.2	0	0.06
2019-09-17	1900-01-01 22:02:26	0.05	0	0.01	0.02	0.01	0	0.39	0.06
2019-09-17	1900-01-01 22:22:26	0.04	0	0.11	0	0.28	0.19	0	0.06
2019-09-17	1900-01-01 22:42:26	0.01	0		0.12		0.09	0.13	0.05
2019-09-17	1900-01-01 23:02:26	0.01	0	0	0.11	0	0.43	0	0.17
2019-09-17	1900-01-01 23:22:26	0.12	0.01		0.07	0		0.17	0.13
2019-09-17	1900-01-01 23:42:26	0.02	0.31	0.02		0.13	0	0.02	0.09
2019-09-18	1900-01-02 00:02:26	0.38	0	0.24	0	0.15	0	0.07	0.09
2019-09-18	1900-01-02 00:22:26	0.28			0.11		0		0.09
2019-09-18	1900-01-02 00:42:26	0.05	0	0		0	0.14	0.12	0.03
2019-09-18	1900-01-02 01:02:26	0	0	0.15		0	0.17		0.04
2019-09-18	1900-01-02 01:22:26	0	0.21	0.14	0	0.21	0.18	0.19
2019-09-18	1900-01-02 01:42:26			0.22	0.08	0.04	0.26	0.24	0.14
2019-09-18	1900-01-02 02:02:26	0.08	0		0	0	0	0
2019-09-18	1900-01-02 02:22:26		0.17		0.04	0.15	0	0	0.04
2019-09-18	1900-01-02 02:42:26	0	0.03	0	0.08	0.26	0	0.07	0.01
2019-09-18	1900-01-02 03:02:26	0.09	0.17		0	0.02	0	0	0.04
2019-09-18	1900-01-02 03:22:26	0.17		0	0	0	0	0.09	0.08
2019-09-18	1900-01-02 03:42:26		0		0	0	0.03	0	0.14
2019-09-18	1900-01-02 04:02:26	0.06	0			0	0.2	0	0.12
2019-09-18	1900-01-02 04:22:26	0.12	0.12	0.03	0	0.01	0.22	0	0.01
2019-09-18	1900-01-02 04:42:26	0.14	0.2	0.25	0.21	0.21	0	0.28	0.13
2019-09-18	1900-01-02 05:02:26	0				0	0	0
2019-09-18	1900-01-02 05:22:26	0.07	0	0	0.12	0	0	0.06	0
2019-09-18	1900-01-02 05:42:26	0	0	0.11	0	0	0	0.06	0.02
2019-09-18	1900-01-02 06:02:26	0	0	0.09	0.11	0	0		0.11
2019-09-18	1900-01-02 06:22:26	0	0		0.12	0.21		0	0
2019-09-18	1900-01-02 06:42:26	0	0.15	0		0	0	0	0
2019-09-18	1900-01-02 07:02:26	0	0		0		0.2	0	0
2019-09-18	1900-01-02 07:22:26	0	0	0	0	0	0	0.08	0.08
2019-09-18	1900-01-02 07:42:26	0	0	0.13	0	0	0	0.19	0
2019-09-18	1900-01-02 08:02:26	0	0	0	0.23	0	0	0	0.18
2019-09-18	1900-01-02 08:22:26				0	0	0	0	0
2019-09-18	1900-01-02 08:42:26	0	0.13	0.14	0				0
2019-09-18	1900-01-02 09:02:26	0.07	0	0		0	0	0.05
2019-09-18	1900-01-02 09:22:26	0.07	0	0	0		0.01	0.09	0
2019-09-18	1900-01-02 09:42:26	0	0.01		0.01	0		0	0
2019-09-18	1900-01-02 10:02:26	0		0	0	0	0	0	0
2019-09-18	1900-01-02 10:22:26	0	0		0.01	0.06	0		0
2019-09-18	1900-01-02 10:42:26	0.02	0	0		0	0.08	0	0.01
2019-09-18	1900-01-02 11:02:26	0	0	0.03	0	0	0	0	0
2019-09-18	1900-01-02 11:22:26		0	0	0	0.01		0	0.05
2019-09-18	1900-01-02 11:42:26	0	0	0	0.07	0	0.13	0	0
2019-09-18	1900-01-02 12:02:26	0.04		0	0	0.06	0.09	0	0.05
2019-09-18	1900-01-02 12:22:26	0.04	0	0.13	0	0.03	0	0	0
2019-09-18	1900-01-02 12:42:26	0	0	0	0	0	0		0
2019-09-18	1900-01-02 13:02:26	0	0	0	0		0	0	0.05
2019-09-18	1900-01-02 13:22:26	0	0		0.18	0	0	0	0
2019-09-18	1900-01-02 13:42:26	0.07	0	0	0	0.07	0.14	0	0.01
2019-09-18	1900-01-02 14:02:26	0.05		0	0	0.12	0.07	0.16	0.07
2019-09-18	1900-01-02 14:22:26	0	0.01	0	0	0	0	0	0
2019-09-18	1900-01-02 14:42:26	0	0	0.08	0.01	0	0	0	0
2019-09-18	1900-01-02 15:02:26	0	0	0.11	0	0	0	0	0.03
2019-09-18	1900-01-02 15:22:26	0	0.06	0	0	0	0.14	0	0.1
2019-09-18	1900-01-02 15:42:26	0.11	0.01	0	0.07	0		0	0.01
2019-09-18	1900-01-01 16:02:26	0.07	0	0	0.12	0.01	0	0.22	0.01
2019-09-18	1900-01-01 16:22:26	0	0	0	0	0.13	0.01	0.01	0.22
2019-09-18	1900-01-01 16:42:26			0.03	0.05	0.03	0.12
2019-09-18	1900-01-01 17:02:26	0	0.1	0.01	0.01	0.14	0.01	0	0
2019-09-18	1900-01-01 17:22:26	0	0	0.06	0.08	0	0.01	0	0
2019-09-18	1900-01-01 17:42:26	0.03	0	0	0.01	0.11			0
2019-09-18	1900-01-01 18:02:26	0.12		0.07	0.14	0.14	0.17	0	0
2019-09-18	1900-01-01 18:22:26	0	0	0.01	0.07	0	0	0.28	0
2019-09-18	1900-01-01 18:42:26	0.02	0	0.17	0.26	0	0.09	0.07	0
2019-09-18	1900-01-01 19:02:26	0.2		0.01	0.01	0.12	0.06	0	0.17
2019-09-18	1900-01-01 19:22:26	0.17	0.03	0	0	0.13	0.12		0
2019-09-18	1900-01-01 19:42:26	0.04	0.11	0.23	0.21	0	0.04	0.27	0.07
2019-09-18	1900-01-01 20:02:26		0	0.1	0.16	0.07	0.2	0.05	0.08
2019-09-18	1900-01-01 20:22:26	0.31	0	0.01	0.13	0.38	0	0.34	0.17
2019-09-18	1900-01-01 20:42:26	0.37	0.03	0.25	0	0	0.03		0.12
2019-09-18	1900-01-01 21:02:26	0.14		0	0.13	0	0.27	0	0.27
2019-09-18	1900-01-01 21:22:26		0	0	0.17	0.01	0	0.04
2019-09-18	1900-01-01 21:42:26	0	0.14	0.01	0	0.3	0.06
2019-09-18	1900-01-01 22:02:26			0.13	0.09	0.1	0.4	0.19	0.03
2019-09-18	1900-01-01 22:22:26	0	0.09	0.19	0.06		0	0.13	0.13
2019-09-18	1900-01-01 22:42:26	0.18	0.19	0	0	0	0		0.23
2019-09-18	1900-01-01 23:02:26	0.25	0	0	0.07	0	0	0.11	0.09
2019-09-18	1900-01-01 23:22:26	0.17		0	0.31	0.11	0	0.21
2019-09-18	1900-01-01 23:42:26	0	0	0.38	0	0.07	0.42	0	0.2
2019-09-19	1900-01-02 00:02:26		0.22	0		0.21	0.39
2019-09-19	1900-01-02 00:22:26	0	0.01	0	0	0	0	0	0
2019-09-19	1900-01-02 00:42:26	0	0		0	0	0	0
2019-09-19	1900-01-02 01:02:26	0.02		0	0	0	0	0.3	0.08
2019-09-19	1900-01-02 01:22:26	0.08	0.3	0	0.03	0	0	0.12	0.1
2019-09-19	1900-01-02 01:42:26	0.29	0	0.28	0.19	0.09	0	0.18
2019-09-19	1900-01-02 02:02:26	0			0.05	0.21	0		0
2019-09-19	1900-01-02 02:22:26	0	0	0	0	0.21	0.32	0	0.08
2019-09-19	1900-01-02 02:42:26	0.01	0.17	0	0	0.02	0.16	0
2019-09-19	1900-01-02 03:02:26	0.29	0.01	0.05		0		0	0.12
2019-09-19	1900-01-02 03:22:26	0.14	0	0.31	0.2	0	0	0
2019-09-19	1900-01-02 03:42:26	0			0.06	0.12	0.01	0	0.05
2019-09-19	1900-01-02 04:02:26	0.04	0.19	0	0	0.15	0.25	0.29	0.24
2019-09-19	1900-01-02 04:22:26	0	0.21	0	0	0.19	0
2019-09-19	1900-01-02 04:42:26	0	0	0.15	0.1	0.04	0.15	0.05	0
2019-09-19	1900-01-02 05:02:26	0.06	0	0.14	0.12	0	0.22	0.09	0.13
2019-09-19	1900-01-02 05:22:26	0.34	0.31	0.32	0.16	0	0.08	0.11	0.12
2019-09-19	1900-01-02 05:42:26	0.38	0	0	0	0	0
2019-09-19	1900-01-02 06:02:26		0		0		0	0	0.02
2019-09-19	1900-01-02 06:22:26	0	0	0	0	0	0	0	0.16
2019-09-19	1900-01-02 06:42:26	0	0	0		0	0	0	0.11
2019-09-19	1900-01-02 07:02:26	0	0		0.04	0.02	0		0.03
2019-09-19	1900-01-02 07:22:26	0	0	0	0.17	0	0	0.03	0
2019-09-19	1900-01-02 07:42:26		0	0				0.15
2019-09-19	1900-01-02 08:02:26	0.1	0	0	0	0	0		0
2019-09-19	1900-01-02 08:22:26	0	0		0	0	0	0	0
2019-09-19	1900-01-02 08:42:26		0	0	0	0	0.01	0	0.17
2019-09-19	1900-01-02 09:02:26	0.01	0	0	0	0		0	0.01
2019-09-19	1900-01-02 09:22:26	0	0	0	0.14	0	0	0	0
2019-09-19	1900-01-02 09:42:26	0	0	0	0.02	0
2019-09-19	1900-01-02 10:02:26		0		0		0	0.02	0
2019-09-19	1900-01-02 10:22:26		0		0	0			0
2019-09-19	1900-01-02 10:42:26	0	0.01	0		0	0	0	0
2019-09-19	1900-01-02 11:02:26		0	0.04	0.01	0	0	0	0
2019-09-19	1900-01-02 11:22:26	0	0	0.03	0	0.06	0.14	0	0
2019-09-19	1900-01-02 11:42:26	0	0	0	0	0		0.11	0
2019-09-19	1900-01-02 12:02:26		0	0	0	0	0	0	0
2019-09-19	1900-01-02 12:22:26	0	0	0	0	0	0	0	0
2019-09-19	1900-01-02 12:42:26	0	0	0	0.06	0.01	0.25		0.06
2019-09-19	1900-01-02 13:02:26	0	0	0.35	0	0.08	0.01	0	0
2019-09-19	1900-01-02 13:22:26	0	0	0.01	0.01	0		0
2019-09-19	1900-01-02 13:42:26	0	0	0	0		0	0	0
2019-09-19	1900-01-02 14:02:26				0.2	0	0	0	0.05
2019-09-19	1900-01-02 14:22:26	0	0.01	0	0	0.11	0	0	0.01
2019-09-19	1900-01-02 14:42:26	0	0	0	0	0.26	0	0.18	0
2019-09-19	1900-01-02 15:02:26	0.06	0	0	0	0	0	0	0.06
2019-09-19	1900-01-02 15:22:26	0.22	0	0.01	0.01	0.01	0	0	0.01
2019-09-19	1900-01-02 15:42:26	0	0	0	0	0	0	0
2019-09-19	1900-01-01 16:22:26		0		0.06	0	0.23	0	0.01
2019-09-19	1900-01-01 16:42:26	0	0.24	0.09	0.07	0	0	0	0.06
2019-09-19	1900-01-01 17:02:26	0	0	0.01	0	0.07		0.09	0
2019-09-19	1900-01-01 17:22:26	0.02	0.04	0	0.09		0.05	0	0.02
2019-09-19	1900-01-01 17:42:26	0.02		0	0.11			0.01	0.01
2019-09-19	1900-01-01 18:02:26			0.13	0.03	0.07	0		0.07
2019-09-19	1900-01-01 18:22:26			0	0.12	0		0.16
2019-09-19	1900-01-01 18:42:26	0		0.3	0.05	0.19	0.17		0.05
2019-09-19	1900-01-01 19:02:26	0.23		0	0.14		0	0.2
2019-09-19	1900-01-01 19:22:26	0.02	0.1	0	0.15	0.15	0.1	0.08	0.16
2019-09-19	1900-01-01 19:42:26	0.06	0.01	0.24	0.13	0.11	0.04		0.03
2019-09-19	1900-01-01 20:02:26	0.39	0.01	0		0	0.19	0.23	0.15
2019-09-19	1900-01-01 20:22:26	0.02	0.2	0	0.04		0.19	0.14	0.09
2019-09-19	1900-01-01 20:42:26			0.16	0.32	0.28	0.06	0	0
2019-09-19	1900-01-01 21:02:26	0.13		0.23	0.01		0		0.2
2019-09-19	1900-01-01 21:22:26	0.32		0		0	0.15	0.07
2019-09-19	1900-01-01 21:42:26	0.31	0	0		0.17	0.26	0.21	0.09
2019-09-19	1900-01-01 22:02:26		0.22		0.13	0.11	0	0.21	0.32
2019-09-19	1900-01-01 22:22:26	0	0	0	0.15	0.16	0	0
2019-09-19	1900-01-01 22:42:26		0	0.04	0.02		0.05	0.19	0.11
2019-09-19	1900-01-01 23:02:26	0	0.38	0.06	0	0	0.33	0.1	0.08
2019-09-19	1900-01-01 23:22:26	0.07				0	0	0	0.05
2019-09-19	1900-01-01 23:42:26	0	0	0.14	0.11	0.03	0		0.07
2019-09-20	1900-01-02 00:02:26	0		0	0.14	0.23	0.37	0	0.19
2019-09-20	1900-01-02 00:22:26	0.18	0	0.32	0	0.19	0	0.16	0.01
2019-09-20	1900-01-02 00:42:26	0.08	0.14	0.21		0	0	0.1	0.07
2019-09-20	1900-01-02 01:02:26	0	0	0			0	0.21	0.1
2019-09-20	1900-01-02 01:22:26	0.09			0	0	0.24		0
2019-09-20	1900-01-02 01:42:26	0.2	0.32	0	0.11	0	0.27	0	0.08
2019-09-20	1900-01-02 02:02:26	0.11	0.26	0.18	0.14	0.17	0	0	0.06
2019-09-20	1900-01-02 02:22:26	0.09		0.18		0.08		0	0
2019-09-20	1900-01-02 02:42:26	0	0	0	0	0.06	0	0.08	0.17
2019-09-20	1900-01-02 03:02:26	0.21	0			0	0	0.26	0
2019-09-20	1900-01-02 03:22:26	0.13	0	0	0.03		0.26	0	0
2019-09-20	1900-01-02 03:42:26	0.03	0	0	0.15	0.13	0.39	0.05	0.14
2019-09-20	1900-01-02 04:02:26	0.15	0	0.28	0.14	0.16	0		0
2019-09-20	1900-01-02 04:22:26	0	0.09	0.05	0.07	0.17	0		0
2019-09-20	1900-01-02 04:42:26	0.06	0.27	0.22	0	0	0	0.19	0.14
2019-09-20	1900-01-02 05:02:26	0.1	0	0				0.1	0.06
2019-09-20	1900-01-02 05:22:26	0.16	0		0.25	0	0.11	0.18
2019-09-20	1900-01-02 05:42:26	0	0.43	0	0.17	0	0.04	0	0
2019-09-20	1900-01-02 06:02:26	0	0	0.17		0.08	0		0.15
2019-09-20	1900-01-02 06:22:26	0	0	0.34	0	0.03	0	0	0.14
2019-09-20	1900-01-02 06:42:26	0.07		0		0	0	0.11
2019-09-20	1900-01-02 07:02:26	0	0		0		0	0.14	0.01
2019-09-20	1900-01-02 07:22:26	0	0	0			0	0.08	0.16
2019-09-20	1900-01-02 07:42:26	0	0		0	0			0.01
2019-09-20	1900-01-02 08:02:26	0	0	0	0	0	0	0	0
2019-09-20	1900-01-02 08:22:26		0	0	0.28	0	0	0	0
2019-09-20	1900-01-02 08:42:26	0	0		0		0	0	0.23
2019-09-20	1900-01-02 09:02:26	0.11		0		0.07	0	0	0
2019-09-20	1900-01-02 09:22:26	0.01	0	0	0	0	0	0
2019-09-20	1900-01-02 09:42:26	0	0.19	0			0	0.02
2019-09-20	1900-01-02 10:02:26	0	0	0	0	0		0.22	0.06
2019-09-20	1900-01-02 10:22:26	0.01	0	0	0	0	0	0
2019-09-20	1900-01-02 10:42:26	0	0	0	0.01	0	0.07
2019-09-20	1900-01-02 11:02:26	0	0	0	0		0.16	0	0
2019-09-20	1900-01-02 11:22:26	0	0		0	0	0	0.01	0.01
2019-09-20	1900-01-02 11:42:26	0.06	0	0	0.11	0	0	0.15	0.22
2019-09-20	1900-01-02 12:02:26	0	0	0.01	0	0	0		0.01
2019-09-20	1900-01-02 12:22:26	0	0	0.28	0	0	0	0
2019-09-20	1900-01-02 12:42:26	0	0	0	0.12	0.06	0	0	0.01
2019-09-20	1900-01-02 13:02:26	0.04	0	0	0	0.1	0	0	0
2019-09-20	1900-01-02 13:22:26	0	0	0	0	0	0	0	0
2019-09-20	1900-01-02 13:42:26	0	0	0	0	0		0	0
2019-09-20	1900-01-02 14:02:26	0.01		0	0	0	0	0.07	0.14
2019-09-20	1900-01-02 14:22:26	0	0.18	0.09	0.01		0	0	0
2019-09-20	1900-01-02 14:42:26	0.19	0.15	0.19	0.07	0	0.13	0
2019-09-20	1900-01-02 15:02:26	0	0	0	0	0	0	0	0
2019-09-20	1900-01-02 15:22:26	0	0	0	0	0	0	0	0
2019-09-20	1900-01-02 15:42:26	0	0.01	0	0	0.07	0	0	0.17
2019-09-20	1900-01-01 16:02:26	0	0	0	0.11	0.07	0	0.19	0

## Sheet: Acitivity-X ambulatory
	Groups:	Group 1:	1
Computer	ID#:	310	306	307	798	308	309	312	NT
Date/Clock	BW (g) in:	27.1	30.5	27	24.7	21.4	23	21.8	19.7
Time	BW (g) out:	25.9	27.3	25.4	23	20.5	22.2	20.9	20.6
2019-09-15	17:02:26	1369	76	180	92	674	279	658	4
2019-09-15	17:22:26	512	657	1035	756	197	410	30	14
2019-09-15	17:42:26	742	1144	772	46	34	360	8	334
2019-09-15	18:02:26	152	91	27	772	27	57	10	322
2019-09-15	18:22:26	79	51	325	571	704	31	714	40
2019-09-15	18:42:26	56	8	1326	1270	205	99	2134	4
2019-09-15	19:02:26	91	469	117	610	261	317	1960	350
2019-09-15	19:22:26	572	664	702	1370	601	223	1666	6
2019-09-15	19:42:26	1016	612	1253	1212	789	106	1949	485
2019-09-15	20:02:26	870	964	881	710	1063	530	1356	1874
2019-09-15	20:22:26	1192	1019	1111	667	204	683	1207	1838
2019-09-15	20:42:26	1483	589	691	431	47	640	918	919
2019-09-15	21:02:26	966	1017	134	266	798	500	860	1703
2019-09-15	21:22:26	1102	418	320	215	302	495	415	929
2019-09-15	21:42:26	530	147	1572	530	347	138	35	132
2019-09-15	22:02:26	418	857	949	591	142	6	595	594
2019-09-15	22:22:26	450	702	346	216	206	182	1014	3039
2019-09-15	22:42:26	97	531	1542	148	57	587	504	2594
2019-09-15	23:02:26	134	646	1103	606	617	340	1083	2809
2019-09-15	23:22:26	399	252	1198	160	399	261	1319	379
2019-09-15	23:42:26	383	171	893	50	169	113	473	810
2019-09-16	1900-01-01 00:02:26	27	11	34	7	445	365	586	2513
2019-09-16	1900-01-01 00:22:26	130	981	110	308	6	240	582	1284
2019-09-16	1900-01-01 00:42:26	218	886	874	53	53	19	784	744
2019-09-16	1900-01-01 01:02:26	270	985	570	195	294	330	375	414
2019-09-16	1900-01-01 01:22:26	294	843	685	81	188	143	3	2
2019-09-16	1900-01-01 01:42:26	295	850	510	137	118	82	6	231
2019-09-16	1900-01-01 02:02:26	61	569	259	100	30	36	297	3
2019-09-16	1900-01-01 02:22:26	15	169	632	209	158	5	277	115
2019-09-16	1900-01-01 02:42:26	133	10	129	292	83	27	194	1010
2019-09-16	1900-01-01 03:02:26	12	0	43	26	85	129	89	217
2019-09-16	1900-01-01 03:22:26	187	0	3	197	45	320	104	537
2019-09-16	1900-01-01 03:42:26	288	227	529	44	18	208	102	583
2019-09-16	1900-01-01 04:02:26	759	856	99	59	182	142	63	113
2019-09-16	1900-01-01 04:22:26	71	91	896	37	214	12	16	44
2019-09-16	1900-01-01 04:42:26	2	352	1346	75	177	10	553	10
2019-09-16	1900-01-01 05:02:26	2	671	1021	29	5	73	663	55
2019-09-16	1900-01-01 05:22:26	242	319	306	21	98	220	19	315
2019-09-16	1900-01-01 05:42:26	403	1	222	362	8	16	261	227
2019-09-16	1900-01-01 06:02:26	17	115	234	180	8	103	139	0
2019-09-16	1900-01-01 06:22:26	146	108	1714	271	4	2	99	95
2019-09-16	1900-01-01 06:42:26	26	149	93	201	14	1	19	470
2019-09-16	1900-01-01 07:02:26	0	6	40	16	230	14	320	184
2019-09-16	1900-01-01 07:22:26	9	2	5	47	84	7	157	216
2019-09-16	1900-01-01 07:42:26	145	71	542	78	214	91	24	1
2019-09-16	1900-01-01 08:02:26	4	108	778	14	17	62	8	57
2019-09-16	1900-01-01 08:22:26	1	9	71	18	2	15	377	1
2019-09-16	1900-01-01 08:42:26	98	11	2	186	44	14	146	3
2019-09-16	1900-01-01 09:02:26	5	9	290	82	219	1	9	316
2019-09-16	1900-01-01 09:22:26	26	6	883	280	152	231	127	703
2019-09-16	1900-01-01 09:42:26	391	694	73	797	171	206	14	548
2019-09-16	1900-01-01 10:02:26	291	770	58	121	77	12	454	68
2019-09-16	1900-01-01 10:22:26	61	136	82	78	18	31	114	57
2019-09-16	1900-01-01 10:42:26	8	215	504	21	1	19	4	4
2019-09-16	1900-01-01 11:02:26	22	81	8	15	94	14	5	6
2019-09-16	1900-01-01 11:22:26	0	7	22	111	43	50	10	5
2019-09-16	1900-01-01 11:42:26	13	4	11	95	7	5	409	307
2019-09-16	1900-01-01 12:02:26	34	168	491	0	48	1	18	370
2019-09-16	1900-01-01 12:22:26	237	3	110	71	140	231	57	8
2019-09-16	1900-01-01 12:42:26	266	1	8	83	42	32	2	8
2019-09-16	1900-01-01 13:02:26	61	1	6	24	51	3	245	13
2019-09-16	1900-01-01 13:22:26	3	7	574	92	11	11	174	7
2019-09-16	1900-01-01 13:42:26	2	69	351	14	12	2	10	37
2019-09-16	1900-01-01 14:02:26	7	142	45	50	130	9	19	13
2019-09-16	1900-01-01 14:22:26	90	8	32	25	32	251	221	86
2019-09-16	1900-01-01 14:42:26	123	9	33	86	36	37	22	192
2019-09-16	1900-01-01 15:02:26	2	34	145	8	8	14	159	2
2019-09-16	1900-01-01 15:22:26	5	26	434	49	12	5	92	14
2019-09-16	1900-01-01 15:42:26	23	2	15	67	6	11	208	8
2019-09-16	1900-01-01 16:02:26	69	1	14	111	102	73	13	196
2019-09-16	1900-01-01 16:22:26	3	317	18	18	141	69	18	0
2019-09-16	1900-01-01 16:42:26	136	170	697	228	213	120	321	305
2019-09-16	1900-01-01 17:02:26	228	384	62	137	10	1	49	313
2019-09-16	1900-01-01 17:22:26	218	5	360	129	125	3	21	0
2019-09-16	1900-01-01 17:42:26	15	75	210	142	35	2	200	2
2019-09-16	1900-01-01 18:02:26	141	67	4	140	98	3	247	479
2019-09-16	1900-01-01 18:22:26	92	101	390	189	44	175	278	170
2019-09-16	1900-01-01 18:42:26	526	15	186	496	99	190	17	42
2019-09-16	1900-01-01 19:02:26	78	47	60	116	146	67	235	42
2019-09-16	1900-01-01 19:22:26	119	40	101	207	53	21	45	171
2019-09-16	1900-01-01 19:42:26	497	750	697	47	112	161	462	281
2019-09-16	1900-01-01 20:02:26	1106	895	58	496	537	74	670	6
2019-09-16	1900-01-01 20:22:26	671	228	76	436	38	14	228	482
2019-09-16	1900-01-01 20:42:26	866	98	502	142	225	281	22	215
2019-09-16	1900-01-01 21:02:26	112	736	22	166	83	112	105	153
2019-09-16	1900-01-01 21:22:26	26	48	410	258	151	13	456	165
2019-09-16	1900-01-01 21:42:26	28	84	355	79	51	179	1445	272
2019-09-16	1900-01-01 22:02:26	24	13	128	143	62	421	908	44
2019-09-16	1900-01-01 22:22:26	11	23	57	110	11	50	525	332
2019-09-16	1900-01-01 22:42:26	228	255	854	61	29	9	902	1137
2019-09-16	1900-01-01 23:02:26	42	12	1007	112	117	101	568	415
2019-09-16	1900-01-01 23:22:26	448	14	1079	66	27	156	463	20
2019-09-16	1900-01-01 23:42:26	470	781	120	143	25	11	281	1087
2019-09-17	1900-01-02 00:02:26	238	42	43	49	66	75	153	1516
2019-09-17	1900-01-02 00:22:26	25	550	591	154	221	59	174	163
2019-09-17	1900-01-02 00:42:26	28	312	233	48	17	26	71	220
2019-09-17	1900-01-02 01:02:26	10	355	41	66	21	112	151	47
2019-09-17	1900-01-02 01:22:26	32	22	154	85	16	146	171	697
2019-09-17	1900-01-02 01:42:26	243	68	129	138	145	190	82	200
2019-09-17	1900-01-02 02:02:26	464	85	486	5	317	2	9	37
2019-09-17	1900-01-02 02:22:26	22	12	641	66	41	6	339	244
2019-09-17	1900-01-02 02:42:26	166	552	198	101	275	5	724	283
2019-09-17	1900-01-02 03:02:26	270	700	66	262	69	128	590	282
2019-09-17	1900-01-02 03:22:26	8	52	764	51	23	216	572	231
2019-09-17	1900-01-02 03:42:26	139	388	161	83	65	17	373	885
2019-09-17	1900-01-02 04:02:26	137	43	266	33	27	143	241	117
2019-09-17	1900-01-02 04:22:26	19	24	846	1	321	96	43	164
2019-09-17	1900-01-02 04:42:26	160	88	570	91	85	54	174	111
2019-09-17	1900-01-02 05:02:26	0	50	28	162	10	5	157	1
2019-09-17	1900-01-02 05:22:26	2	14	92	177	99	9	447	500
2019-09-17	1900-01-02 05:42:26	271	500	642	305	22	2	22	33
2019-09-17	1900-01-01 06:02:26	328	47	451	19	33	8	671	149
2019-09-17	1900-01-01 06:22:26	14	46	22	27	130	3	117	93
2019-09-17	1900-01-01 06:42:26	6	10	32	369	54	22	137	19
2019-09-17	1900-01-01 07:02:26	7	9	198	30	39	37	11	311
2019-09-17	1900-01-01 07:22:26	2	10	89	0	10	1	383	1
2019-09-17	1900-01-01 07:42:26	8	313	218	82	6	46	1191	9
2019-09-17	1900-01-01 08:02:26	4	181	414	3	11	63	278	422
2019-09-17	1900-01-01 08:22:26	3	9	347	147	160	3	299	367
2019-09-17	1900-01-01 08:42:26	100	15	42	126	112	49	236	25
2019-09-17	1900-01-01 09:02:26	260	4	31	10	3	34	48	31
2019-09-17	1900-01-01 09:22:26	81	139	4	38	16	32	5	174
2019-09-17	1900-01-01 09:42:26	66	89	439	273	124	139	232	558
2019-09-17	1900-01-01 10:02:26	279	352	120	79	131	59	44	14
2019-09-17	1900-01-01 10:22:26	1	52	176	28	41	10	13	121
2019-09-17	1900-01-01 10:42:26	7	3	366	153	16	52	33	179
2019-09-17	1900-01-01 11:02:26	7	73	5	97	121	214	306	80
2019-09-17	1900-01-01 11:22:26	59	81	41	24	58	33	370	38
2019-09-17	1900-01-01 11:42:26	176	10	6	5	81	15	422	2
2019-09-17	1900-01-01 12:02:26	2	27	570	96	158	27	65	11
2019-09-17	1900-01-01 12:22:26	1	15	205	2	65	44	198	236
2019-09-17	1900-01-01 12:42:26	3	1	24	116	20	1	15	131
2019-09-17	1900-01-01 13:02:26	6	68	201	42	32	38	16	12
2019-09-17	1900-01-01 13:22:26	4	27	11	1	11	152	115	43
2019-09-17	1900-01-01 13:42:26	214	3	30	53	29	0	1434	7
2019-09-17	1900-01-01 14:02:26	102	14	40	14	25	2	488	6
2019-09-17	1900-01-01 14:22:26	5	94	61	66	94	19	70	44
2019-09-17	1900-01-01 14:42:26	68	5	3	79	107	17	23	197
2019-09-17	1900-01-01 15:02:26	124	0	214	20	169	21	27	1
2019-09-17	1900-01-01 15:22:26	0	77	352	114	18	112	184	111
2019-09-17	1900-01-01 15:42:26	42	259	1	230	14	66	22	294
2019-09-17	1900-01-01 16:02:26	248	7	67	29	26	12	11	11
2019-09-17	1900-01-01 16:22:26	369	0	112	13	30	15	323	10
2019-09-17	1900-01-01 16:42:26	229	203	445	215	357	229	246	1242
2019-09-17	1900-01-01 17:02:26	11	460	18	10	30	147	103	123
2019-09-17	1900-01-01 17:22:26	5	85	141	120	236	21	13	221
2019-09-17	1900-01-01 17:42:26	123	26	607	32	34	2	31	32
2019-09-17	1900-01-01 18:02:26	43	16	23	108	14	13	203	231
2019-09-17	1900-01-01 18:22:26	38	19	516	154	101	67	191	29
2019-09-17	1900-01-01 18:42:26	253	81	312	131	70	109	55	183
2019-09-17	1900-01-01 19:02:26	147	60	245	174	7	28	393	197
2019-09-17	1900-01-01 19:22:26	280	165	546	317	171	5	967	121
2019-09-17	1900-01-01 19:42:26	398	437	356	46	81	151	370	106
2019-09-17	1900-01-01 20:02:26	193	84	334	180	69	460	5	87
2019-09-17	1900-01-01 20:22:26	79	31	22	33	131	29	39	101
2019-09-17	1900-01-01 20:42:26	11	21	445	145	40	11	341	335
2019-09-17	1900-01-01 21:02:26	105	41	437	21	37	141	51	219
2019-09-17	1900-01-01 21:22:26	209	29	286	59	103	4	210	8
2019-09-17	1900-01-01 21:42:26	91	23	130	74	5	59	80	116
2019-09-17	1900-01-01 22:02:26	14	70	219	201	125	95	457	273
2019-09-17	1900-01-01 22:22:26	61	12	331	5	75	193	175	130
2019-09-17	1900-01-01 22:42:26	4	16	201	155	20	56	266	91
2019-09-17	1900-01-01 23:02:26	167	63	283	32	15	220	149	342
2019-09-17	1900-01-01 23:22:26	24	361	84	354	18	19	782	247
2019-09-17	1900-01-01 23:42:26	261	81	239	87	144	13	403	779
2019-09-18	1900-01-02 00:02:26	284	3	481	14	261	8	314	275
2019-09-18	1900-01-02 00:22:26	415	16	785	154	46	8	17	336
2019-09-18	1900-01-02 00:42:26	77	5	78	142	16	116	250	72
2019-09-18	1900-01-02 01:02:26	4	73	355	21	50	104	32	15
2019-09-18	1900-01-02 01:22:26	4	146	180	21	140	180	179	66
2019-09-18	1900-01-02 01:42:26	133	20	534	270	105	259	573	141
2019-09-18	1900-01-02 02:02:26	113	53	176	181	16	122	18	44
2019-09-18	1900-01-02 02:22:26	4	26	169	108	200	29	459	353
2019-09-18	1900-01-02 02:42:26	5	465	303	131	141	28	267	37
2019-09-18	1900-01-02 03:02:26	169	139	116	28	116	10	137	139
2019-09-18	1900-01-02 03:22:26	112	41	377	122	49	16	110	623
2019-09-18	1900-01-02 03:42:26	9	27	249	81	36	180	32	170
2019-09-18	1900-01-02 04:02:26	208	37	186	14	9	136	87	95
2019-09-18	1900-01-02 04:22:26	265	581	204	63	87	106	90	740
2019-09-18	1900-01-02 04:42:26	589	212	468	341	222	39	757	45
2019-09-18	1900-01-02 05:02:26	57	26	209	49	29	14	916	126
2019-09-18	1900-01-02 05:22:26	43	8	210	163	9	4	513	24
2019-09-18	1900-01-02 05:42:26	14	93	464	5	3	8	298	42
2019-09-18	1900-01-02 06:02:26	95	4	759	135	118	5	85	446
2019-09-18	1900-01-02 06:22:26	10	215	116	118	224	0	37	15
2019-09-18	1900-01-02 06:42:26	1	95	378	11	39	97	11	51
2019-09-18	1900-01-02 07:02:26	14	3	165	81	6	74	26	33
2019-09-18	1900-01-02 07:22:26	7	16	428	19	134	19	500	414
2019-09-18	1900-01-02 07:42:26	0	14	548	22	10	10	425	92
2019-09-18	1900-01-02 08:02:26	46	18	192	228	14	7	15	238
2019-09-18	1900-01-02 08:22:26	102	54	74	24	152	63	123	28
2019-09-18	1900-01-02 08:42:26	22	212	31	3	95	6	14	105
2019-09-18	1900-01-02 09:02:26	80	17	342	55	13	16	269	14
2019-09-18	1900-01-02 09:22:26	132	15	315	9	11	0	295	64
2019-09-18	1900-01-02 09:42:26	241	161	507	150	209	289	246	1215
2019-09-18	1900-01-02 10:02:26	392	451	167	224	40	161	47	360
2019-09-18	1900-01-02 10:22:26	134	129	270	33	370	31	29	242
2019-09-18	1900-01-02 10:42:26	614	62	94	48	31	128	235	542
2019-09-18	1900-01-02 11:02:26	40	193	442	12	4	15	167	84
2019-09-18	1900-01-02 11:22:26	5	64	65	97	4	11	45	246
2019-09-18	1900-01-02 11:42:26	9	29	84	79	2	107	0	214
2019-09-18	1900-01-02 12:02:26	147	87	57	3	270	81	273	333
2019-09-18	1900-01-02 12:22:26	14	14	666	76	39	8	22	24
2019-09-18	1900-01-02 12:42:26	2	45	56	11	1	8	21	9
2019-09-18	1900-01-02 13:02:26	28	17	22	18	14	24	8	162
2019-09-18	1900-01-02 13:22:26	13	27	120	189	10	5	18	144
2019-09-18	1900-01-02 13:42:26	239	92	41	20	126	101	261	20
2019-09-18	1900-01-02 14:02:26	41	6	1	8	163	69	622	118
2019-09-18	1900-01-02 14:22:26	4	31	93	10	1	10	43	16
2019-09-18	1900-01-02 14:42:26	1	16	485	5	2	4	35	13
2019-09-18	1900-01-02 15:02:26	7	6	358	11	9	21	16	113
2019-09-18	1900-01-02 15:22:26	59	201	3	79	45	169	11	213
2019-09-18	1900-01-02 15:42:26	284	15	36	209	15	24	120	6
2019-09-18	1900-01-01 16:02:26	379	14	38	85	14	9	426	39
2019-09-18	1900-01-01 16:22:26	8	8	55	11	319	5	200	446
2019-09-18	1900-01-01 16:42:26	375	208	290	132	310	395	503	279
2019-09-18	1900-01-01 17:02:26	392	411	143	78	88	299	572	41
2019-09-18	1900-01-01 17:22:26	49	106	320	45	12	24	217	71
2019-09-18	1900-01-01 17:42:26	84	90	150	10	65	122	7	106
2019-09-18	1900-01-01 18:02:26	325	35	253	109	118	154	38	128
2019-09-18	1900-01-01 18:22:26	19	45	144	278	14	132	801	61
2019-09-18	1900-01-01 18:42:26	30	48	214	538	24	17	656	20
2019-09-18	1900-01-01 19:02:26	190	30	247	170	298	140	92	338
2019-09-18	1900-01-01 19:22:26	329	259	315	19	97	218	47	3
2019-09-18	1900-01-01 19:42:26	32	117	566	76	8	62	552	276
2019-09-18	1900-01-01 20:02:26	29	17	396	192	270	209	314	239
2019-09-18	1900-01-01 20:22:26	138	106	236	478	86	31	486	235
2019-09-18	1900-01-01 20:42:26	358	391	859	28	38	79	313	178
2019-09-18	1900-01-01 21:02:26	253	60	247	109	15	125	10	458
2019-09-18	1900-01-01 21:22:26	5	24	34	84	58	25	186	7
2019-09-18	1900-01-01 21:42:26	2	125	126	49	65	60	84	119
2019-09-18	1900-01-01 22:02:26	38	2	310	80	51	166	221	35
2019-09-18	1900-01-01 22:22:26	49	280	692	31	35	12	237	194
2019-09-18	1900-01-01 22:42:26	142	596	170	123	5	118	31	203
2019-09-18	1900-01-01 23:02:26	305	13	82	19	73	15	142	135
2019-09-18	1900-01-01 23:22:26	289	10	123	271	29	101	249	62
2019-09-18	1900-01-01 23:42:26	10	6	705	234	329	186	41	112
2019-09-19	1900-01-02 00:02:26	15	70	206	37	184	219	23	81
2019-09-19	1900-01-02 00:22:26	3	52	16	48	17	22	42	7
2019-09-19	1900-01-02 00:42:26	14	11	216	29	12	9	108	5
2019-09-19	1900-01-02 01:02:26	12	11	132	23	48	12	564	221
2019-09-19	1900-01-02 01:22:26	101	302	139	99	11	7	470	167
2019-09-19	1900-01-02 01:42:26	221	92	899	142	171	69	428	12
2019-09-19	1900-01-02 02:02:26	16	19	220	139	95	29	111	52
2019-09-19	1900-01-02 02:22:26	3	5	85	7	206	98	129	84
2019-09-19	1900-01-02 02:42:26	233	102	101	46	25	130	9	37
2019-09-19	1900-01-02 03:02:26	142	8	645	45	6	42	19	127
2019-09-19	1900-01-02 03:22:26	280	2	556	228	36	37	37	48
2019-09-19	1900-01-02 03:42:26	37	3	171	135	283	61	342	187
2019-09-19	1900-01-02 04:02:26	44	90	200	16	203	46	268	494
2019-09-19	1900-01-02 04:22:26	13	82	155	13	128	14	7	27
2019-09-19	1900-01-02 04:42:26	65	9	631	51	67	185	337	22
2019-09-19	1900-01-02 05:02:26	129	119	559	62	9	86	125	312
2019-09-19	1900-01-02 05:22:26	264	316	513	334	25	71	382	244
2019-09-19	1900-01-02 05:42:26	298	23	199	51	117	28	137	58
2019-09-19	1900-01-02 06:02:26	44	5	76	34	13	28	8	54
2019-09-19	1900-01-02 06:22:26	4	1	371	91	12	21	97	78
2019-09-19	1900-01-02 06:42:26	13	0	440	6	5	36	12	294
2019-09-19	1900-01-02 07:02:26	2	23	22	48	141	13	3	77
2019-09-19	1900-01-02 07:22:26	48	63	470	330	201	35	385	18
2019-09-19	1900-01-02 07:42:26	206	16	70	7	39	23	949	27
2019-09-19	1900-01-02 08:02:26	94	59	72	6	1	67	51	25
2019-09-19	1900-01-02 08:22:26	12	5	312	14	0	6	21	15
2019-09-19	1900-01-02 08:42:26	12	8	91	22	93	9	60	476
2019-09-19	1900-01-02 09:02:26	9	75	119	5	6	22	129	193
2019-09-19	1900-01-02 09:22:26	5	0	15	150	29	13	6	10
2019-09-19	1900-01-02 09:42:26	86	3	369	306	141	160	248	359
2019-09-19	1900-01-02 10:02:26	313	348	270	188	308	53	989	410
2019-09-19	1900-01-02 10:22:26	42	212	73	5	83	99	195	301
2019-09-19	1900-01-02 10:42:26	314	248	337	76	7	15	179	78
2019-09-19	1900-01-02 11:02:26	32	127	350	11	25	21	159	252
2019-09-19	1900-01-02 11:22:26	9	39	188	36	190	221	30	60
2019-09-19	1900-01-02 11:42:26	182	170	64	42	60	10	540	48
2019-09-19	1900-01-02 12:02:26	4	203	235	21	3	7	21	31
2019-09-19	1900-01-02 12:22:26	57	32	53	25	11	71	93	19
2019-09-19	1900-01-02 12:42:26	34	19	68	36	146	140	4	310
2019-09-19	1900-01-02 13:02:26	0	83	566	34	36	15	52	19
2019-09-19	1900-01-02 13:22:26	3	49	148	42	20	57	260	14
2019-09-19	1900-01-02 13:42:26	78	15	56	7	48	111	5	13
2019-09-19	1900-01-02 14:02:26	1	85	48	224	8	9	25	208
2019-09-19	1900-01-02 14:22:26	3	2	33	128	150	19	158	98
2019-09-19	1900-01-02 14:42:26	1	3	239	2	100	11	277	13
2019-09-19	1900-01-02 15:02:26	137	1	0	37	44	12	17	97
2019-09-19	1900-01-02 15:22:26	165	21	77	58	23	2	61	44
2019-09-19	1900-01-02 15:42:26	36	1	19	92	33	47	112	11
2019-09-19	1900-01-01 16:22:26	1	23	262	29	4	105	6	39
2019-09-19	1900-01-01 16:42:26	31	161	601	71	9	86	22	193
2019-09-19	1900-01-01 17:02:26	307	367	879	291	419	241	407	1220
2019-09-19	1900-01-01 17:22:26	360	269	202	127	55	132	152	113
2019-09-19	1900-01-01 17:42:26	281	58	45	45	31	66	350	78
2019-09-19	1900-01-01 18:02:26	49	82	395	127	73	8	127	155
2019-09-19	1900-01-01 18:22:26	3	60	234	72	5	78	215	32
2019-09-19	1900-01-01 18:42:26	18	33	702	232	334	21	26	99
2019-09-19	1900-01-01 19:02:26	201	16	176	174	74	9	438	20
2019-09-19	1900-01-01 19:22:26	127	427	443	206	95	208	391	437
2019-09-19	1900-01-01 19:42:26	105	102	790	153	301	48	49	82
2019-09-19	1900-01-01 20:02:26	346	184	54	140	19	29	311	223
2019-09-19	1900-01-01 20:22:26	272	53	210	43	6	360	272	175
2019-09-19	1900-01-01 20:42:26	86	94	150	230	251	75	74	90
2019-09-19	1900-01-01 21:02:26	137	23	1089	170	211	34	54	254
2019-09-19	1900-01-01 21:22:26	255	8	104	126	31	149	422	118
2019-09-19	1900-01-01 21:42:26	451	38	178	1	84	94	203	238
2019-09-19	1900-01-01 22:02:26	252	136	340	195	152	19	268	678
2019-09-19	1900-01-01 22:22:26	13	7	113	152	107	15	33	38
2019-09-19	1900-01-01 22:42:26	7	32	296	123	51	118	328	154
2019-09-19	1900-01-01 23:02:26	28	379	426	86	54	102	201	180
2019-09-19	1900-01-01 23:22:26	10	7	312	15	16	12	18	137
2019-09-19	1900-01-01 23:42:26	4	16	332	195	92	43	3	95
2019-09-20	1900-01-02 00:02:26	116	1	239	223	344	168	53	135
2019-09-20	1900-01-02 00:22:26	131	1	370	22	114	11	245	64
2019-09-20	1900-01-02 00:42:26	7	109	276	93	64	21	169	355
2019-09-20	1900-01-02 01:02:26	11	1	83	8	25	38	224	74
2019-09-20	1900-01-02 01:22:26	176	3	162	38	3	154	37	5
2019-09-20	1900-01-02 01:42:26	126	95	127	49	66	46	16	145
2019-09-20	1900-01-02 02:02:26	209	150	345	245	145	40	122	133
2019-09-20	1900-01-02 02:22:26	92	6	233	77	124	35	79	47
2019-09-20	1900-01-02 02:42:26	19	6	139	9	51	9	292	165
2019-09-20	1900-01-02 03:02:26	205	4	56	32	12	86	296	202
2019-09-20	1900-01-02 03:22:26	52	4	239	35	24	89	194	8
2019-09-20	1900-01-02 03:42:26	173	41	189	75	116	149	86	140
2019-09-20	1900-01-02 04:02:26	34	0	421	225	416	59	20	107
2019-09-20	1900-01-02 04:22:26	210	56	122	100	134	21	61	17
2019-09-20	1900-01-02 04:42:26	92	83	166	7	74	7	228	206
2019-09-20	1900-01-02 05:02:26	107	116	372	24	47	7	143	134
2019-09-20	1900-01-02 05:22:26	236	173	61	57	12	95	171	39
2019-09-20	1900-01-02 05:42:26	62	267	400	208	42	51	30	63
2019-09-20	1900-01-02 06:02:26	4	35	374	191	261	18	23	198
2019-09-20	1900-01-02 06:22:26	26	3	381	12	121	14	12	92
2019-09-20	1900-01-02 06:42:26	72	11	497	40	107	7	206	12
2019-09-20	1900-01-02 07:02:26	12	0	118	46	11	37	285	39
2019-09-20	1900-01-02 07:22:26	2	4	170	11	62	44	1733	164
2019-09-20	1900-01-02 07:42:26	3	4	137	16	55	10	735	81
2019-09-20	1900-01-02 08:02:26	1	13	412	56	1	59	80	2
2019-09-20	1900-01-02 08:22:26	2	112	69	157	6	21	20	34
2019-09-20	1900-01-02 08:42:26	26	11	66	234	18	19	41	203
2019-09-20	1900-01-02 09:02:26	79	7	281	9	144	10	24	16
2019-09-20	1900-01-02 09:22:26	28	19	225	11	22	47	33	19
2019-09-20	1900-01-02 09:42:26	2	161	61	56	10	102	314	22
2019-09-20	1900-01-02 10:02:26	2	47	109	19	79	6	312	160
2019-09-20	1900-01-02 10:22:26	33	2	627	5	162	14	40	6
2019-09-20	1900-01-02 10:42:26	0	1	38	70	55	112	14	22
2019-09-20	1900-01-02 11:02:26	0	24	100	14	30	46	13	33
2019-09-20	1900-01-02 11:22:26	36	19	124	4	41	12	171	5
2019-09-20	1900-01-02 11:42:26	207	2	49	182	6	6	690	189
2019-09-20	1900-01-02 12:02:26	20	32	365	26	9	19	44	34
2019-09-20	1900-01-02 12:22:26	1	25	322	0	20	155	14	13
2019-09-20	1900-01-02 12:42:26	4	10	44	251	235	2	17	43
2019-09-20	1900-01-02 13:02:26	46	74	53	11	140	23	57	25
2019-09-20	1900-01-02 13:22:26	0	13	358	62	12	49	43	10
2019-09-20	1900-01-02 13:42:26	1	4	77	151	38	2	143	58
2019-09-20	1900-01-02 14:02:26	0	1	203	19	105	7	108	177
2019-09-20	1900-01-02 14:22:26	21	53	512	44	21	20	15	11
2019-09-20	1900-01-02 14:42:26	107	204	855	41	61	216	23	10
2019-09-20	1900-01-02 15:02:26	5	0	57	0	17	20	17	11
2019-09-20	1900-01-02 15:22:26	3	2	211	56	14	4	0	35
2019-09-20	1900-01-02 15:42:26	37	6	267	8	323	9	1	274
2019-09-20	1900-01-01 16:02:26	56	0	60	114	109	14	483	8

## Sheet: EE
	Groups:	Group 1:	1
Computer	ID#:	310	306	307	798	308	309	312	NT
Date/Clock	BW (g) in:	27.1	30.5	27	24.7	21.4	23	21.8	19.7
Time	BW (g) out:	25.9	27.3	25.4	23	20.5	22.2	20.9	20.6
2019-09-15	17:02:26	0.422067	0.451414	0.305977	0.328659	0.347548	0.447649	0.288571	0.223312
2019-09-15	17:22:26	0.379092	0.448314	0.394928	0.425775	0.287576	0.370218	0.18094	0.233321
2019-09-15	17:42:26	0.340622	0.45175	0.275615	0.220424	0.251645	0.353268	0.222828	0.393245
2019-09-15	18:02:26	0.285272	0.239163	0.266026	0.526772	0.236627	0.203547	0.227601	0.21921
2019-09-15	18:22:26	0.282555	0.238082	0.407099	0.41973	0.389244	0.197018	0.416262	0.229748
2019-09-15	18:42:26	0.213022	0.272415	0.38642	0.43933	0.22492	0.355438	0.426869	0.224674
2019-09-15	19:02:26	0.32029	0.518945	0.234816	0.418815	0.247948	0.358757	0.41528	0.390077
2019-09-15	19:22:26	0.454774	0.269679	0.419489	0.364654	0.394972	0.224178	0.40414	0.195838
2019-09-15	19:42:26	0.448146	0.444974	0.410273	0.472599	0.380105	0.296528	0.373394	0.381144
2019-09-15	20:02:26	0.4542	0.428307	0.409752	0.367023	0.375973	0.398804	0.355958	0.382181
2019-09-15	20:22:26	0.466269	0.44686	0.373692	0.475665	0.301067	0.412373	0.408147	0.378735
2019-09-15	20:42:26	0.417486	0.410594	0.38028	0.377186	0.314776	0.376272	0.372039	0.313247
2019-09-15	21:02:26	0.43001	0.48215	0.222956	0.353767	0.357826	0.387073	0.337311	0.343569
2019-09-15	21:22:26	0.419093	0.278258	0.35739	0.319457	0.276741	0.341855	0.362573	0.235665
2019-09-15	21:42:26	0.380999	0.352951	0.432204	0.504976	0.337951	0.258057	0.247273	0.227536
2019-09-15	22:02:26	0.396331	0.486801	0.292028	0.370154	0.340594	0.220835	0.428162	0.336539
2019-09-15	22:22:26	0.383976	0.436227	0.383983	0.238787	0.268745	0.398794	0.423559	0.403432
2019-09-15	22:42:26	0.288731	0.459349	0.439862	0.360204	0.248872	0.387752	0.317562	0.394186
2019-09-15	23:02:26	0.343523	0.461346	0.3849	0.404105	0.354042	0.378216	0.384747	0.379312
2019-09-15	23:22:26	0.367519	0.283099	0.408756	0.337721	0.279142	0.297182	0.37475	0.274968
2019-09-15	23:42:26	0.399792	0.237769	0.370093	0.318293	0.372231	0.370331	0.321163	0.416335
2019-09-16	1900-01-01 00:02:26	0.280959	0.18415	0.229211	0.233113	0.315859	0.414312	0.356585	0.400383
2019-09-16	1900-01-01 00:22:26	0.342454	0.529418	0.317901	0.298955	0.222513	0.366722	0.350969	0.378586
2019-09-16	1900-01-01 00:42:26	0.408501	0.515957	0.441395	0.23678	0.349275	0.256003	0.321027	0.327463
2019-09-16	1900-01-01 01:02:26	0.423065	0.499047	0.311841	0.413532	0.316317	0.386712	0.376667	0.330953
2019-09-16	1900-01-01 01:22:26	0.360746	0.461809	0.361732	0.242563	0.376599	0.38002	0.222939	0.219626
2019-09-16	1900-01-01 01:42:26	0.417413	0.381551	0.273935	0.307515	0.247477	0.370547	0.228237	0.241424
2019-09-16	1900-01-01 02:02:26	0.290566	0.366929	0.344786	0.37755	0.353962	0.3039	0.429728	0.196503
2019-09-16	1900-01-01 02:22:26	0.257183	0.343289	0.362141	0.285567	0.260286	0.273285	0.384876	0.372791
2019-09-16	1900-01-01 02:42:26	0.378082	0.202222	0.23546	0.428971	0.385089	0.261884	0.401149	0.393051
2019-09-16	1900-01-01 03:02:26	0.311843	0.171586	0.229997	0.277816	0.294045	0.380826	0.30179	0.341433
2019-09-16	1900-01-01 03:22:26	0.324866	0.199963	0.242107	0.253674	0.234843	0.388657	0.384828	0.382589
2019-09-16	1900-01-01 03:42:26	0.377407	0.49626	0.403419	0.27066	0.222827	0.372471	0.29748	0.270639
2019-09-16	1900-01-01 04:02:26	0.453183	0.491247	0.293165	0.261747	0.371854	0.31646	0.304989	0.28012
2019-09-16	1900-01-01 04:22:26	0.310949	0.262964	0.419358	0.303949	0.324295	0.285185	0.287839	0.218656
2019-09-16	1900-01-01 04:42:26	0.258094	0.467793	0.418557	0.326525	0.276237	0.271321	0.425958	0.201948
2019-09-16	1900-01-01 05:02:26	0.249607	0.451581	0.355917	0.254619	0.230238	0.358469	0.370273	0.432818
2019-09-16	1900-01-01 05:22:26	0.433718	0.302242	0.277061	0.337619	0.308357	0.387985	0.266051	0.26566
2019-09-16	1900-01-01 05:42:26	0.411462	0.211317	0.309757	0.489828	0.223224	0.283501	0.388629	0.240618
2019-09-16	1900-01-01 06:02:26	0.278525	0.295471	0.350612	0.323893	0.221286	0.360963	0.279677	0.198481
2019-09-16	1900-01-01 06:22:26	0.363731	0.37585	0.392119	0.34592	0.208225	0.256201	0.271771	0.276466
2019-09-16	1900-01-01 06:42:26	0.266929	0.300305	0.255451	0.31708	0.215462	0.249714	0.245788	0.262502
2019-09-16	1900-01-01 07:02:26	0.230632	0.206263	0.212495	0.269187	0.397603	0.236491	0.440973	0.230013
2019-09-16	1900-01-01 07:22:26	0.323145	0.187994	0.214223	0.300321	0.303216	0.211764	0.310229	0.384219
2019-09-16	1900-01-01 07:42:26	0.343626	0.390463	0.425361	0.242359	0.350698	0.312562	0.240554	0.19994
2019-09-16	1900-01-01 08:02:26	0.233197	0.377662	0.363439	0.240907	0.224073	0.273407	0.240726	0.249163
2019-09-16	1900-01-01 08:22:26	0.244838	0.223904	0.223359	0.262101	0.184423	0.247286	0.431714	0.226066
2019-09-16	1900-01-01 08:42:26	0.25915	0.220717	0.232999	0.361845	0.357243	0.22646	0.278514	0.227833
2019-09-16	1900-01-01 09:02:26	0.232177	0.222602	0.399222	0.265264	0.351046	0.21689	0.234663	0.443441
2019-09-16	1900-01-01 09:22:26	0.311785	0.250529	0.383944	0.501763	0.339337	0.468806	0.304764	0.366821
2019-09-16	1900-01-01 09:42:26	0.360894	0.56204	0.235672	0.321463	0.296869	0.349275	0.263492	0.343093
2019-09-16	1900-01-01 10:02:26	0.320438	0.387385	0.229707	0.241972	0.337132	0.255731	0.41069	0.203755
2019-09-16	1900-01-01 10:22:26	0.281868	0.399557	0.383916	0.327607	0.267165	0.31353	0.241329	0.36211
2019-09-16	1900-01-01 10:42:26	0.289736	0.303048	0.333778	0.341457	0.221757	0.252541	0.24014	0.211641
2019-09-16	1900-01-01 11:02:26	0.248962	0.282345	0.233788	0.211548	0.320904	0.219574	0.250561	0.212628
2019-09-16	1900-01-01 11:22:26	0.248075	0.226236	0.24395	0.260027	0.252307	0.290307	0.266634	0.237499
2019-09-16	1900-01-01 11:42:26	0.352833	0.200509	0.228117	0.315393	0.223977	0.239216	0.405392	0.324127
2019-09-16	1900-01-01 12:02:26	0.355843	0.401219	0.421737	0.239065	0.317674	0.224507	0.224485	0.361078
2019-09-16	1900-01-01 12:22:26	0.402874	0.217466	0.216859	0.242775	0.329978	0.368937	0.254442	0.220235
2019-09-16	1900-01-01 12:42:26	0.392705	0.228051	0.239885	0.27402	0.211359	0.235141	0.239889	0.231219
2019-09-16	1900-01-01 13:02:26	0.321186	0.254049	0.252553	0.258977	0.290378	0.200873	0.387355	0.239165
2019-09-16	1900-01-01 13:22:26	0.275316	0.29099	0.384458	0.243322	0.230399	0.230345	0.265841	0.187085
2019-09-16	1900-01-01 13:42:26	0.266484	0.446813	0.348777	0.288492	0.234269	0.255024	0.246885	0.226097
2019-09-16	1900-01-01 14:02:26	0.242267	0.244353	0.250163	0.228064	0.373506	0.280439	0.271375	0.250269
2019-09-16	1900-01-01 14:22:26	0.361736	0.241792	0.252861	0.251177	0.237755	0.427927	0.291828	0.311543
2019-09-16	1900-01-01 14:42:26	0.296884	0.247781	0.230595	0.293794	0.278096	0.259019	0.275739	0.293459
2019-09-16	1900-01-01 15:02:26	0.301377	0.264872	0.352142	0.255557	0.244379	0.276017	0.301408	0.222161
2019-09-16	1900-01-01 15:22:26	0.281608	0.264005	0.282792	0.31178	0.236474	0.218112	0.235334	0.210866
2019-09-16	1900-01-01 15:42:26	0.359703	0.22767	0.240952	0.26306	0.256044	0.244359	0.301227	0.241865
2019-09-16	1900-01-01 16:02:26	0.284996	0.288154	0.243752	0.28959	0.371743	0.324123	0.245691	0.386954
2019-09-16	1900-01-01 16:22:26	0.288321	0.490206	0.268441	0.294075	0.271704	0.330149	0.253125	0.236995
2019-09-16	1900-01-01 16:42:26	0.362507	0.331399	0.421363	0.480589	0.337139	0.342208	0.386432	0.375258
2019-09-16	1900-01-01 17:02:26	0.37264	0.357427	0.27233	0.309093	0.254729	0.244471	0.237027	0.379564
2019-09-16	1900-01-01 17:22:26	0.461457	0.230577	0.398286	0.418478	0.386031	0.250663	0.293748	0.229474
2019-09-16	1900-01-01 17:42:26	0.297073	0.448784	0.262848	0.280128	0.27124	0.257362	0.442544	0.241378
2019-09-16	1900-01-01 18:02:26	0.314928	0.249951	0.255586	0.44781	0.391524	0.263121	0.403574	0.3594
2019-09-16	1900-01-01 18:22:26	0.471971	0.44895	0.371896	0.454855	0.345955	0.397384	0.340197	0.2287
2019-09-16	1900-01-01 18:42:26	0.490582	0.290469	0.315389	0.31242	0.364098	0.304248	0.287613	0.246698
2019-09-16	1900-01-01 19:02:26	0.324446	0.248168	0.33273	0.257402	0.310637	0.275835	0.419135	0.401963
2019-09-16	1900-01-01 19:22:26	0.438513	0.488822	0.294894	0.333672	0.42163	0.282658	0.359388	0.370455
2019-09-16	1900-01-01 19:42:26	0.456432	0.482876	0.481247	0.267663	0.339214	0.423789	0.371173	0.370796
2019-09-16	1900-01-01 20:02:26	0.500113	0.443125	0.259619	0.450464	0.423387	0.327188	0.396327	0.274731
2019-09-16	1900-01-01 20:22:26	0.456239	0.290767	0.417198	0.407819	0.307052	0.300224	0.351034	0.346991
2019-09-16	1900-01-01 20:42:26	0.453299	0.369403	0.302169	0.373315	0.391522	0.438182	0.295964	0.30925
2019-09-16	1900-01-01 21:02:26	0.445568	0.492258	0.2504	0.300061	0.304594	0.357125	0.416317	0.328244
2019-09-16	1900-01-01 21:22:26	0.303581	0.35574	0.412933	0.395919	0.333432	0.307643	0.377191	0.298649
2019-09-16	1900-01-01 21:42:26	0.41622	0.31894	0.281516	0.312692	0.334303	0.390837	0.435726	0.37207
2019-09-16	1900-01-01 22:02:26	0.301601	0.25688	0.257596	0.28655	0.378601	0.425122	0.396919	0.28402
2019-09-16	1900-01-01 22:22:26	0.307832	0.298334	0.359558	0.381018	0.287181	0.339049	0.404296	0.428031
2019-09-16	1900-01-01 22:42:26	0.485165	0.412401	0.454296	0.284225	0.369019	0.313051	0.401107	0.350188
2019-09-16	1900-01-01 23:02:26	0.362257	0.288457	0.408551	0.273969	0.413451	0.423102	0.427492	0.291473
2019-09-16	1900-01-01 23:22:26	0.492226	0.389104	0.399036	0.346266	0.308007	0.342061	0.364225	0.280475
2019-09-16	1900-01-01 23:42:26	0.448332	0.478345	0.253393	0.283732	0.277788	0.306138	0.308582	0.407796
2019-09-17	1900-01-02 00:02:26	0.38152	0.360887	0.237322	0.402258	0.379603	0.414777	0.350139	0.403206
2019-09-17	1900-01-02 00:22:26	0.318124	0.506703	0.375782	0.386623	0.365482	0.335864	0.42492	0.323199
2019-09-17	1900-01-02 00:42:26	0.293854	0.408703	0.285369	0.33522	0.285039	0.3169	0.298055	0.276281
2019-09-17	1900-01-02 01:02:26	0.283592	0.381254	0.262228	0.22782	0.257209	0.394002	0.345687	0.339676
2019-09-17	1900-01-02 01:22:26	0.382431	0.254349	0.35671	0.374158	0.262481	0.433942	0.324792	0.364047
2019-09-17	1900-01-02 01:42:26	0.467621	0.272699	0.24909	0.34014	0.38289	0.416688	0.271974	0.283596
2019-09-17	1900-01-02 02:02:26	0.451236	0.277726	0.442393	0.33547	0.410619	0.313498	0.289536	0.257035
2019-09-17	1900-01-02 02:22:26	0.303607	0.294121	0.405859	0.422422	0.301132	0.287018	0.394301	0.316756
2019-09-17	1900-01-02 02:42:26	0.445756	0.515111	0.273867	0.288133	0.4218	0.280231	0.429176	0.429001
2019-09-17	1900-01-02 03:02:26	0.385424	0.468058	0.309415	0.34409	0.323785	0.428686	0.405411	0.245283
2019-09-17	1900-01-02 03:22:26	0.297921	0.264504	0.32274	0.352771	0.260738	0.454534	0.393744	0.401231
2019-09-17	1900-01-02 03:42:26	0.4536	0.441842	0.273937	0.262732	0.237256	0.383747	0.344705	0.373859
2019-09-17	1900-01-02 04:02:26	0.356998	0.359444	0.424209	0.30023	0.274509	0.435906	0.360519	0.245521
2019-09-17	1900-01-02 04:22:26	0.357753	0.284853	0.416693	0.250064	0.414151	0.433271	0.286822	0.270981
2019-09-17	1900-01-02 04:42:26	0.395742	0.387862	0.337355	0.315662	0.375544	0.336648	0.305226	0.25411
2019-09-17	1900-01-02 05:02:26	0.295175	0.249816	0.258846	0.300851	0.257624	0.290713	0.37676	0.338301
2019-09-17	1900-01-02 05:22:26	0.299404	0.291967	0.373543	0.351501	0.281786	0.29358	0.386967	0.313652
2019-09-17	1900-01-02 05:42:26	0.452603	0.405885	0.379257	0.347392	0.246036	0.249034	0.277554	0.320357
2019-09-17	1900-01-01 06:02:26	0.426876	0.2319	0.353467	0.250297	0.366057	0.23035	0.415078	0.381172
2019-09-17	1900-01-01 06:22:26	0.272435	0.244949	0.236712	0.275145	0.371821	0.228899	0.280444	0.239407
2019-09-17	1900-01-01 06:42:26	0.260113	0.2118	0.251727	0.394398	0.24417	0.332812	0.294304	0.306351
2019-09-17	1900-01-01 07:02:26	0.262236	0.206739	0.250011	0.234263	0.261789	0.249534	0.276494	0.257756
2019-09-17	1900-01-01 07:22:26	0.285273	0.375892	0.350078	0.200134	0.227666	0.242592	0.468128	0.233142
2019-09-17	1900-01-01 07:42:26	0.280734	0.50441	0.242172	0.439992	0.265337	0.412047	0.38169	0.241625
2019-09-17	1900-01-01 08:02:26	0.274908	0.316893	0.416841	0.216866	0.311465	0.266694	0.282978	0.437394
2019-09-17	1900-01-01 08:22:26	0.359106	0.230623	0.268549	0.359942	0.383352	0.22757	0.287196	0.281468
2019-09-17	1900-01-01 08:42:26	0.450764	0.223907	0.244719	0.252895	0.291874	0.384905	0.394787	0.194945
2019-09-17	1900-01-01 09:02:26	0.298181	0.259331	0.256379	0.278392	0.204207	0.251095	0.347107	0.306216
2019-09-17	1900-01-01 09:22:26	0.374131	0.457525	0.261528	0.358505	0.287292	0.333397	0.280478	0.402667
2019-09-17	1900-01-01 09:42:26	0.310308	0.312712	0.374542	0.463252	0.374717	0.387162	0.30242	0.28898
2019-09-17	1900-01-01 10:02:26	0.386503	0.411095	0.351475	0.416535	0.343966	0.329627	0.300181	0.246505
2019-09-17	1900-01-01 10:22:26	0.291501	0.375012	0.399466	0.229871	0.257767	0.2572	0.262022	0.421108
2019-09-17	1900-01-01 10:42:26	0.262115	0.236947	0.256402	0.297581	0.233965	0.419516	0.287475	0.229735
2019-09-17	1900-01-01 11:02:26	0.244226	0.454256	0.247979	0.279524	0.329064	0.409274	0.432628	0.36664
2019-09-17	1900-01-01 11:22:26	0.412684	0.341961	0.238229	0.25849	0.355771	0.265435	0.44169	0.247591
2019-09-17	1900-01-01 11:42:26	0.303999	0.259395	0.264834	0.270656	0.219887	0.228706	0.383384	0.252564
2019-09-17	1900-01-01 12:02:26	0.257029	0.266144	0.412776	0.284579	0.397796	0.291188	0.287666	0.25281
2019-09-17	1900-01-01 12:22:26	0.252509	0.232889	0.282977	0.267352	0.302	0.239247	0.297607	0.316089
2019-09-17	1900-01-01 12:42:26	0.271913	0.259122	0.253182	0.378919	0.249151	0.220124	0.263443	0.249164
2019-09-17	1900-01-01 13:02:26	0.248035	0.432126	0.402298	0.271375	0.24912	0.350198	0.292462	0.237004
2019-09-17	1900-01-01 13:22:26	0.289177	0.244442	0.238134	0.267228	0.245827	0.333763	0.379816	0.303773
2019-09-17	1900-01-01 13:42:26	0.423345	0.224999	0.253464	0.28879	0.238623	0.231668	0.464932	0.249299
2019-09-17	1900-01-01 14:02:26	0.304894	0.406991	0.269736	0.217871	0.224034	0.240272	0.291832	0.240586
2019-09-17	1900-01-01 14:22:26	0.272385	0.243852	0.230878	0.293088	0.377375	0.228271	0.260396	0.263919
2019-09-17	1900-01-01 14:42:26	0.369213	0.237394	0.242623	0.346	0.340919	0.235033	0.287676	0.258725
2019-09-17	1900-01-01 15:02:26	0.250814	0.261499	0.426318	0.29153	0.361727	0.314005	0.292662	0.249738
2019-09-17	1900-01-01 15:22:26	0.283948	0.486679	0.291178	0.451015	0.260071	0.375558	0.293555	0.399935
2019-09-17	1900-01-01 15:42:26	0.378991	0.409736	0.218862	0.309323	0.264451	0.265014	0.287395	0.288069
2019-09-17	1900-01-01 16:02:26	0.397754	0.234502	0.30331	0.240047	0.299909	0.24807	0.299692	0.22225
2019-09-17	1900-01-01 16:22:26	0.427306	0.243186	0.401473	0.271655	0.253668	0.253106	0.47423	0.252418
2019-09-17	1900-01-01 16:42:26	0.404036	0.60752	0.33422	0.223464	0.364869	0.458013	0.305529	0.435251
2019-09-17	1900-01-01 17:02:26	0.281174	0.420737	0.259229	0.370663	0.249022	0.350419	0.373258	0.366811
2019-09-17	1900-01-01 17:22:26	0.274216	0.341785	0.335745	0.411312	0.398545	0.293097	0.308796	0.368837
2019-09-17	1900-01-01 17:42:26	0.409063	0.439592	0.384217	0.28864	0.293843	0.28242	0.363749	0.274718
2019-09-17	1900-01-01 18:02:26	0.268269	0.355594	0.287487	0.342948	0.25886	0.251012	0.318966	0.359959
2019-09-17	1900-01-01 18:22:26	0.35836	0.242106	0.364647	0.317897	0.380179	0.399099	0.428256	0.271348
2019-09-17	1900-01-01 18:42:26	0.474143	0.490412	0.452784	0.435432	0.323579	0.318863	0.394548	0.40046
2019-09-17	1900-01-01 19:02:26	0.35822	0.29691	0.328045	0.475925	0.309981	0.314903	0.395579	0.335145
2019-09-17	1900-01-01 19:22:26	0.435076	0.517411	0.461243	0.333647	0.386984	0.295646	0.438384	0.371616
2019-09-17	1900-01-01 19:42:26	0.436546	0.36032	0.410814	0.402543	0.34237	0.442247	0.333021	0.356827
2019-09-17	1900-01-01 20:02:26	0.382112	0.327967	0.314816	0.373183	0.383193	0.459311	0.303264	0.334505
2019-09-17	1900-01-01 20:22:26	0.403253	0.407769	0.288807	0.365031	0.364709	0.34621	0.383089	0.375766
2019-09-17	1900-01-01 20:42:26	0.332605	0.331426	0.433055	0.348594	0.332752	0.314546	0.408739	0.337324
2019-09-17	1900-01-01 21:02:26	0.437729	0.336137	0.347611	0.300812	0.317386	0.42673	0.355014	0.385308
2019-09-17	1900-01-01 21:22:26	0.405415	0.319488	0.410861	0.369359	0.359339	0.319864	0.327044	0.28962
2019-09-17	1900-01-01 21:42:26	0.410747	0.354824	0.295362	0.377137	0.300666	0.412366	0.427924	0.322992
2019-09-17	1900-01-01 22:02:26	0.33286	0.349263	0.3367	0.317337	0.385345	0.353519	0.452389	0.319979
2019-09-17	1900-01-01 22:22:26	0.342206	0.257946	0.451521	0.293611	0.395154	0.461999	0.348063	0.309113
2019-09-17	1900-01-01 22:42:26	0.307886	0.284	0.295868	0.445005	0.299613	0.371766	0.447751	0.468531
2019-09-17	1900-01-01 23:02:26	0.459194	0.487465	0.325631	0.359861	0.278502	0.491925	0.360949	0.328337
2019-09-17	1900-01-01 23:22:26	0.347783	0.35788	0.255667	0.488241	0.295285	0.352323	0.45269	0.330866
2019-09-17	1900-01-01 23:42:26	0.472803	0.47634	0.447327	0.357673	0.41367	0.318338	0.361789	0.454564
2019-09-18	1900-01-02 00:02:26	0.473841	0.301715	0.463265	0.263899	0.412224	0.303198	0.359362	0.339132
2019-09-18	1900-01-02 00:22:26	0.458541	0.385026	0.34575	0.441358	0.297937	0.29751	0.2798	0.395341
2019-09-18	1900-01-02 00:42:26	0.347709	0.265127	0.266405	0.315592	0.301315	0.430861	0.45539	0.431818
2019-09-18	1900-01-02 01:02:26	0.311184	0.393797	0.420639	0.259894	0.305444	0.397324	0.358328	0.284395
2019-09-18	1900-01-02 01:22:26	0.284784	0.514623	0.382504	0.352049	0.374049	0.412347	0.407905	0.283305
2019-09-18	1900-01-02 01:42:26	0.45681	0.368968	0.465127	0.515305	0.318744	0.481692	0.39851	0.335466
2019-09-18	1900-01-02 02:02:26	0.336487	0.289285	0.340596	0.297029	0.281752	0.377077	0.305544	0.450568
2019-09-18	1900-01-02 02:22:26	0.297365	0.347757	0.288151	0.403351	0.412305	0.344516	0.459568	0.300216
2019-09-18	1900-01-02 02:42:26	0.30309	0.510784	0.437519	0.385713	0.39205	0.283898	0.325186	0.244871
2019-09-18	1900-01-02 03:02:26	0.457369	0.385411	0.290414	0.240713	0.391629	0.276009	0.42475	0.448598
2019-09-18	1900-01-02 03:22:26	0.361634	0.293195	0.404124	0.385025	0.2809	0.293094	0.31126	0.375965
2019-09-18	1900-01-02 03:42:26	0.339659	0.415241	0.342576	0.238585	0.267069	0.386149	0.336837	0.430026
2019-09-18	1900-01-02 04:02:26	0.346475	0.333758	0.271572	0.228311	0.256021	0.401431	0.318177	0.348641
2019-09-18	1900-01-02 04:22:26	0.457721	0.477212	0.455904	0.41411	0.432202	0.457319	0.350996	0.40426
2019-09-18	1900-01-02 04:42:26	0.439189	0.460426	0.436257	0.514789	0.428013	0.312641	0.508395	0.29594
2019-09-18	1900-01-02 05:02:26	0.413181	0.294264	0.307401	0.296405	0.280783	0.28285	0.339662	0.272717
2019-09-18	1900-01-02 05:22:26	0.306405	0.271045	0.289035	0.429031	0.238289	0.246353	0.406647	0.257791
2019-09-18	1900-01-02 05:42:26	0.266184	0.278376	0.374255	0.226715	0.218462	0.238393	0.299392	0.332357
2019-09-18	1900-01-02 06:02:26	0.358118	0.235982	0.437733	0.405352	0.411289	0.218197	0.262628	0.368991
2019-09-18	1900-01-02 06:22:26	0.259908	0.534851	0.271687	0.358095	0.353359	0.200089	0.288126	0.230447
2019-09-18	1900-01-02 06:42:26	0.292645	0.356814	0.349071	0.253511	0.275071	0.419862	0.286814	0.285133
2019-09-18	1900-01-02 07:02:26	0.282869	0.263543	0.40789	0.327378	0.217584	0.401514	0.296931	0.348111
2019-09-18	1900-01-02 07:22:26	0.286773	0.269986	0.373749	0.256528	0.280721	0.286255	0.471861	0.311559
2019-09-18	1900-01-02 07:42:26	0.294405	0.283474	0.416436	0.403696	0.213964	0.245172	0.369404	0.37976
2019-09-18	1900-01-02 08:02:26	0.458649	0.328111	0.272027	0.427287	0.24823	0.291121	0.312799	0.294366
2019-09-18	1900-01-02 08:22:26	0.304059	0.47216	0.267038	0.263169	0.329233	0.245483	0.347213	0.268553
2019-09-18	1900-01-02 08:42:26	0.402595	0.405413	0.287021	0.288932	0.213475	0.211623	0.29572	0.387519
2019-09-18	1900-01-02 09:02:26	0.289435	0.248792	0.430456	0.335914	0.227205	0.269402	0.437066	0.247263
2019-09-18	1900-01-02 09:22:26	0.31357	0.23767	0.375579	0.267704	0.268345	0.26026	0.3437	0.312754
2019-09-18	1900-01-02 09:42:26	0.48366	0.618698	0.332972	0.400937	0.367803	0.488624	0.35438	0.400615
2019-09-18	1900-01-02 10:02:26	0.428852	0.565929	0.349197	0.320257	0.217119	0.38009	0.288461	0.380621
2019-09-18	1900-01-02 10:22:26	0.344319	0.516096	0.418409	0.417817	0.352548	0.293684	0.337035	0.33688
2019-09-18	1900-01-02 10:42:26	0.4295	0.515104	0.339475	0.353352	0.22861	0.383662	0.397966	0.378721
2019-09-18	1900-01-02 11:02:26	0.304677	0.499324	0.339452	0.268718	0.265762	0.233469	0.368789	0.306174
2019-09-18	1900-01-02 11:22:26	0.329128	0.487569	0.336934	0.404425	0.256769	0.255912	0.279302	0.302927
2019-09-18	1900-01-02 11:42:26	0.343583	0.487211	0.302088	0.284618	0.232207	0.407694	0.302184	0.268041
2019-09-18	1900-01-02 12:02:26	0.385219	0.444554	0.339944	0.274924	0.34754	0.290811	0.376719	0.362709
2019-09-18	1900-01-02 12:22:26	0.290169	0.364764	0.400188	0.315868	0.243643	0.256827	0.26334	0.305488
2019-09-18	1900-01-02 12:42:26	0.308048	0.425539	0.297394	0.255827	0.232064	0.263166	0.338497	0.268929
2019-09-18	1900-01-02 13:02:26	0.304244	0.358066	0.328601	0.304127	0.250284	0.331227	0.272418	0.353039
2019-09-18	1900-01-02 13:22:26	0.336894	0.430361	0.298996	0.403212	0.2875	0.238035	0.279829	0.233873
2019-09-18	1900-01-02 13:42:26	0.386749	0.32294	0.266717	0.287842	0.353836	0.416021	0.409155	0.230746
2019-09-18	1900-01-02 14:02:26	0.2751	0.351876	0.264832	0.278736	0.343786	0.273164	0.39782	0.35425
2019-09-18	1900-01-02 14:22:26	0.270039	0.298242	0.312312	0.259245	0.24088	0.251762	0.261341	0.260343
2019-09-18	1900-01-02 14:42:26	0.283604	0.287401	0.423615	0.269964	0.247704	0.246014	0.315102	0.304824
2019-09-18	1900-01-02 15:02:26	0.30725	0.28639	0.265952	0.254403	0.244448	0.284166	0.281079	0.32212
2019-09-18	1900-01-02 15:22:26	0.388544	0.430753	0.28618	0.2997	0.272266	0.400318	0.263735	0.227076
2019-09-18	1900-01-02 15:42:26	0.429143	0.305342	0.27741	0.434978	0.241548	0.251301	0.396618	0.27186
2019-09-18	1900-01-01 16:02:26	0.412897	0.404415	0.260647	0.27733	0.244058	0.237507	0.42908	0.380746
2019-09-18	1900-01-01 16:22:26	0.258519	0.2772	0.337931	0.347929	0.397195	0.239297	0.31614	0.380066
2019-09-18	1900-01-01 16:42:26	0.39155	0.483559	0.338208	0.359013	0.35889	0.42198	0.404192	0.225636
2019-09-18	1900-01-01 17:02:26	0.393384	0.55049	0.34188	0.402174	0.279515	0.407617	0.378828	0.372311
2019-09-18	1900-01-01 17:22:26	0.326553	0.530186	0.329824	0.384557	0.237198	0.247731	0.27402	0.28209
2019-09-18	1900-01-01 17:42:26	0.401951	0.440025	0.36776	0.308906	0.361136	0.406413	0.309525	0.302373
2019-09-18	1900-01-01 18:02:26	0.361198	0.467883	0.338271	0.40312	0.312209	0.386873	0.356907	0.30096
2019-09-18	1900-01-01 18:22:26	0.362687	0.363042	0.356358	0.404886	0.290797	0.312133	0.389894	0.292456
2019-09-18	1900-01-01 18:42:26	0.359324	0.384256	0.344787	0.425969	0.279542	0.283411	0.320021	0.309547
2019-09-18	1900-01-01 19:02:26	0.460149	0.429119	0.36405	0.389415	0.395264	0.414663	0.309677	0.303922
2019-09-18	1900-01-01 19:22:26	0.3804	0.369813	0.451351	0.325305	0.386432	0.323157	0.316999	0.286195
2019-09-18	1900-01-01 19:42:26	0.338867	0.431494	0.358253	0.352587	0.269851	0.345669	0.450291	0.420274
2019-09-18	1900-01-01 20:02:26	0.413919	0.361238	0.377076	0.409622	0.418633	0.374499	0.33781	0.42053
2019-09-18	1900-01-01 20:22:26	0.473287	0.358909	0.343466	0.471381	0.407389	0.338921	0.37381	0.376065
2019-09-18	1900-01-01 20:42:26	0.465171	0.45847	0.438435	0.292947	0.367113	0.407044	0.319542	0.380227
2019-09-18	1900-01-01 21:02:26	0.440547	0.341336	0.291776	0.347994	0.289577	0.346066	0.312712	0.392864
2019-09-18	1900-01-01 21:22:26	0.327645	0.302562	0.277682	0.353388	0.331556	0.330308	0.348074	0.260571
2019-09-18	1900-01-01 21:42:26	0.300206	0.367843	0.365295	0.309792	0.372721	0.364846	0.301039	0.304243
2019-09-18	1900-01-01 22:02:26	0.395236	0.32751	0.307214	0.399533	0.370226	0.400123	0.476776	0.286621
2019-09-18	1900-01-01 22:22:26	0.377397	0.447559	0.394206	0.346351	0.294916	0.374798	0.358607	0.413648
2019-09-18	1900-01-01 22:42:26	0.428731	0.394744	0.267936	0.431668	0.264107	0.332103	0.305163	0.387744
2019-09-18	1900-01-01 23:02:26	0.466539	0.27861	0.227979	0.322206	0.346214	0.295533	0.394024	0.344866
2019-09-18	1900-01-01 23:22:26	0.456426	0.275558	0.428693	0.491186	0.347388	0.426533	0.391778	0.373106
2019-09-18	1900-01-01 23:42:26	0.340029	0.279173	0.418423	0.351347	0.362459	0.463123	0.298103	0.350113
2019-09-19	1900-01-02 00:02:26	0.400955	0.415236	0.308649	0.371584	0.395967	0.469351	0.294368	0.362973
2019-09-19	1900-01-02 00:22:26	0.354527	0.264012	0.271846	0.274965	0.281941	0.339094	0.303731	0.279904
2019-09-19	1900-01-02 00:42:26	0.308974	0.276251	0.270045	0.278128	0.254737	0.3094	0.440973	0.29077
2019-09-19	1900-01-02 01:02:26	0.337033	0.292136	0.366446	0.293575	0.304304	0.282336	0.468385	0.407142
2019-09-19	1900-01-02 01:22:26	0.440639	0.497177	0.453836	0.478365	0.267365	0.297195	0.345326	0.285973
2019-09-19	1900-01-02 01:42:26	0.440762	0.294625	0.465793	0.43726	0.418371	0.333416	0.384785	0.263205
2019-09-19	1900-01-02 02:02:26	0.330427	0.292698	0.296478	0.353719	0.376512	0.330937	0.378491	0.341711
2019-09-19	1900-01-02 02:22:26	0.301961	0.263837	0.274072	0.280793	0.414275	0.433666	0.284642	0.271149
2019-09-19	1900-01-02 02:42:26	0.499584	0.376232	0.290962	0.365089	0.301325	0.395382	0.298521	0.377797
2019-09-19	1900-01-02 03:02:26	0.484907	0.241252	0.449536	0.284641	0.273034	0.314285	0.301651	0.31193
2019-09-19	1900-01-02 03:22:26	0.449349	0.209837	0.410471	0.425468	0.305389	0.291686	0.317961	0.362814
2019-09-19	1900-01-02 03:42:26	0.339394	0.244614	0.358096	0.380711	0.418772	0.362716	0.485818	0.416791
2019-09-19	1900-01-02 04:02:26	0.345701	0.444485	0.328266	0.264183	0.354209	0.351808	0.36053	0.330978
2019-09-19	1900-01-02 04:22:26	0.302375	0.307391	0.269658	0.370555	0.358897	0.31998	0.277011	0.262148
2019-09-19	1900-01-02 04:42:26	0.447746	0.275157	0.455743	0.306118	0.310423	0.380043	0.411959	0.277439
2019-09-19	1900-01-02 05:02:26	0.423317	0.417094	0.41252	0.379425	0.260697	0.404991	0.300468	0.446306
2019-09-19	1900-01-02 05:22:26	0.501603	0.485162	0.394344	0.422281	0.289903	0.35773	0.379932	0.313018
2019-09-19	1900-01-02 05:42:26	0.448047	0.31518	0.354242	0.272755	0.299126	0.282881	0.271672	0.244799
2019-09-19	1900-01-02 06:02:26	0.327562	0.262395	0.269171	0.402258	0.204253	0.300773	0.289	0.401552
2019-09-19	1900-01-02 06:22:26	0.29145	0.218693	0.357717	0.245995	0.22871	0.251184	0.282351	0.316942
2019-09-19	1900-01-02 06:42:26	0.299643	0.19196	0.307937	0.256339	0.228228	0.299687	0.291583	0.390816
2019-09-19	1900-01-02 07:02:26	0.303415	0.367849	0.269242	0.488312	0.385861	0.225342	0.295861	0.309862
2019-09-19	1900-01-02 07:22:26	0.451667	0.223825	0.316382	0.427333	0.335324	0.237615	0.424482	0.313379
2019-09-19	1900-01-02 07:42:26	0.480495	0.22545	0.236745	0.287813	0.229357	0.361191	0.376689	0.356829
2019-09-19	1900-01-02 08:02:26	0.316435	0.231066	0.348562	0.307959	0.24137	0.250737	0.248011	0.285663
2019-09-19	1900-01-02 08:22:26	0.309293	0.261482	0.241317	0.273983	0.253559	0.229894	0.278672	0.271925
2019-09-19	1900-01-02 08:42:26	0.289639	0.218018	0.289932	0.272513	0.341507	0.256365	0.359484	0.403255
2019-09-19	1900-01-02 09:02:26	0.316822	0.287588	0.243531	0.251069	0.245256	0.247619	0.269787	0.308292
2019-09-19	1900-01-02 09:22:26	0.301188	0.22082	0.223841	0.412057	0.234378	0.284641	0.301233	0.253749
2019-09-19	1900-01-02 09:42:26	0.332379	0.241833	0.337708	0.361267	0.364299	0.352275	0.349762	0.394707
2019-09-19	1900-01-02 10:02:26	0.39781	0.517572	0.308779	0.369262	0.307698	0.297696	0.397217	0.319152
2019-09-19	1900-01-02 10:22:26	0.468098	0.480951	0.338574	0.310285	0.288096	0.373244	0.344472	0.375308
2019-09-19	1900-01-02 10:42:26	0.411247	0.439668	0.316555	0.27394	0.257577	0.259426	0.296382	0.30238
2019-09-19	1900-01-02 11:02:26	0.35067	0.412121	0.420468	0.318588	0.276167	0.259715	0.286793	0.35585
2019-09-19	1900-01-02 11:22:26	0.358131	0.368961	0.310893	0.280863	0.397958	0.378669	0.295833	0.279928
2019-09-19	1900-01-02 11:42:26	0.363755	0.359119	0.286845	0.370791	0.239582	0.251338	0.298466	0.260552
2019-09-19	1900-01-02 12:02:26	0.323098	0.4353	0.284361	0.270707	0.254238	0.256702	0.270089	0.300628
2019-09-19	1900-01-02 12:22:26	0.40918	0.305942	0.280742	0.278572	0.264171	0.372057	0.272499	0.259153
2019-09-19	1900-01-02 12:42:26	0.308743	0.315434	0.332352	0.295936	0.3749	0.365341	0.252518	0.343167
2019-09-19	1900-01-02 13:02:26	0.31869	0.394963	0.355699	0.253419	0.233147	0.271428	0.353261	0.257698
2019-09-19	1900-01-02 13:22:26	0.315296	0.313612	0.283828	0.319064	0.244472	0.32769	0.251396	0.300642
2019-09-19	1900-01-02 13:42:26	0.433158	0.290288	0.298922	0.289377	0.255433	0.285035	0.276086	0.270971
2019-09-19	1900-01-02 14:02:26	0.29244	0.330182	0.268253	0.374827	0.25525	0.22376	0.260868	0.363192
2019-09-19	1900-01-02 14:22:26	0.315081	0.270047	0.28749	0.298075	0.369783	0.253521	0.363119	0.261862
2019-09-19	1900-01-02 14:42:26	0.286871	0.256985	0.332317	0.289789	0.317588	0.243079	0.322793	0.278572
2019-09-19	1900-01-02 15:02:26	0.477478	0.254256	0.24553	0.284018	0.272965	0.261912	0.24657	0.344579
2019-09-19	1900-01-02 15:22:26	0.438561	0.353944	0.259357	0.2763	0.311017	0.245404	0.322234	0.266554
2019-09-19	1900-01-02 15:42:26	0.306471	0.22127	0.262943	0.390385	0.237219	0.360372	0.285165	0.285845
2019-09-19	1900-01-01 16:22:26	0.306351	0.365118	0.383742	0.402168	0.259851	0.307963	0.231763	0.342954
2019-09-19	1900-01-01 16:42:26	0.39041	0.374172	0.351717	0.26772	0.33779	0.297821	0.311295	0.359424
2019-09-19	1900-01-01 17:02:26	0.46384	0.475205	0.443534	0.421863	0.418529	0.381807	0.364007	0.383112
2019-09-19	1900-01-01 17:22:26	0.432451	0.421996	0.450499	0.299774	0.260476	0.317443	0.254638	0.368073
2019-09-19	1900-01-01 17:42:26	0.420377	0.385744	0.314328	0.37627	0.366464	0.374689	0.333759	0.323451
2019-09-19	1900-01-01 18:02:26	0.310707	0.383634	0.481273	0.313437	0.283553	0.274528	0.39997	0.279813
2019-09-19	1900-01-01 18:22:26	0.338036	0.420978	0.337763	0.445007	0.306227	0.392361	0.287697	0.370117
2019-09-19	1900-01-01 18:42:26	0.365241	0.420273	0.441991	0.367153	0.401389	0.297657	0.296042	0.273851
2019-09-19	1900-01-01 19:02:26	0.462043	0.370489	0.332813	0.461352	0.319971	0.305515	0.375493	0.289232
2019-09-19	1900-01-01 19:22:26	0.372657	0.521787	0.4857	0.440593	0.385467	0.41191	0.29866	0.397403
2019-09-19	1900-01-01 19:42:26	0.471504	0.334102	0.401543	0.348645	0.421402	0.311356	0.29948	0.267684
2019-09-19	1900-01-01 20:02:26	0.46418	0.464194	0.295729	0.317497	0.296079	0.348323	0.387294	0.363539
2019-09-19	1900-01-01 20:22:26	0.35359	0.325134	0.381797	0.355244	0.289487	0.454292	0.383049	0.318718
2019-09-19	1900-01-01 20:42:26	0.352351	0.318414	0.447931	0.439228	0.433507	0.364418	0.29696	0.331477
2019-09-19	1900-01-01 21:02:26	0.440063	0.378302	0.44256	0.368044	0.329946	0.366132	0.27465	0.364186
2019-09-19	1900-01-01 21:22:26	0.48999	0.322021	0.30956	0.402587	0.275911	0.394238	0.402873	0.272572
2019-09-19	1900-01-01 21:42:26	0.488659	0.381824	0.411494	0.296817	0.363615	0.392277	0.40148	0.343707
2019-09-19	1900-01-01 22:02:26	0.42033	0.291752	0.305446	0.443578	0.441658	0.33986	0.335629	0.421874
2019-09-19	1900-01-01 22:22:26	0.307912	0.318664	0.291945	0.366921	0.364464	0.303982	0.311588	0.31784
2019-09-19	1900-01-01 22:42:26	0.301881	0.415922	0.477007	0.341999	0.300418	0.45936	0.367094	0.373223
2019-09-19	1900-01-01 23:02:26	0.396905	0.373816	0.332074	0.30106	0.279228	0.424609	0.312778	0.309043
2019-09-19	1900-01-01 23:22:26	0.309707	0.281787	0.367149	0.271035	0.274472	0.325628	0.281063	0.417368
2019-09-19	1900-01-01 23:42:26	0.307736	0.301245	0.400628	0.420199	0.402169	0.410076	0.278574	0.327086
2019-09-20	1900-01-02 00:02:26	0.487835	0.249698	0.45152	0.449647	0.420313	0.471598	0.429783	0.466988
2019-09-20	1900-01-02 00:22:26	0.43195	0.310305	0.369508	0.290243	0.430688	0.359739	0.336913	0.372642
2019-09-20	1900-01-02 00:42:26	0.349093	0.312627	0.393387	0.403143	0.288287	0.322158	0.363565	0.43808
2019-09-20	1900-01-02 01:02:26	0.316297	0.250249	0.331057	0.283578	0.261139	0.383151	0.380041	0.312137
2019-09-20	1900-01-02 01:22:26	0.450802	0.279446	0.291248	0.430109	0.287296	0.468323	0.288889	0.312132
2019-09-20	1900-01-02 01:42:26	0.452352	0.492638	0.341546	0.409848	0.301334	0.413147	0.292217	0.413511
2019-09-20	1900-01-02 02:02:26	0.378718	0.42375	0.422029	0.358027	0.4056	0.357631	0.299766	0.280845
2019-09-20	1900-01-02 02:22:26	0.394401	0.275335	0.344947	0.31728	0.36199	0.377004	0.387223	0.40463
2019-09-20	1900-01-02 02:42:26	0.343997	0.234384	0.41738	0.2849	0.341771	0.295955	0.368275	0.410278
2019-09-20	1900-01-02 03:02:26	0.451913	0.223636	0.265547	0.284571	0.260074	0.387271	0.362029	0.283277
2019-09-20	1900-01-02 03:22:26	0.362962	0.239862	0.393259	0.304862	0.294055	0.401439	0.369463	0.304905
2019-09-20	1900-01-02 03:42:26	0.428768	0.355089	0.425562	0.313615	0.400613	0.468838	0.283795	0.378096
2019-09-20	1900-01-02 04:02:26	0.354872	0.252527	0.451277	0.406867	0.403	0.371977	0.284211	0.28773
2019-09-20	1900-01-02 04:22:26	0.479599	0.449615	0.37164	0.349201	0.372618	0.303507	0.384584	0.296869
2019-09-20	1900-01-02 04:42:26	0.341378	0.359668	0.349563	0.277403	0.304803	0.27928	0.367257	0.432927
2019-09-20	1900-01-02 05:02:26	0.406163	0.362124	0.347175	0.289995	0.291482	0.262643	0.334348	0.299851
2019-09-20	1900-01-02 05:22:26	0.44463	0.429586	0.255063	0.453069	0.259648	0.38661	0.395201	0.272932
2019-09-20	1900-01-02 05:42:26	0.285248	0.456961	0.402395	0.461928	0.37294	0.297534	0.28757	0.275626
2019-09-20	1900-01-02 06:02:26	0.278631	0.298479	0.413893	0.310423	0.416056	0.27627	0.283385	0.363485
2019-09-20	1900-01-02 06:22:26	0.4421	0.228638	0.485229	0.311331	0.347772	0.246921	0.24932	0.300691
2019-09-20	1900-01-02 06:42:26	0.303759	0.247391	0.417136	0.37912	0.256635	0.213788	0.425839	0.252541
2019-09-20	1900-01-02 07:02:26	0.29548	0.214247	0.24915	0.278915	0.254359	0.350031	0.418176	0.348266
2019-09-20	1900-01-02 07:22:26	0.282409	0.213938	0.256188	0.257489	0.359423	0.252408	0.408608	0.356616
2019-09-20	1900-01-02 07:42:26	0.29788	0.211456	0.265732	0.309178	0.224483	0.229141	0.37157	0.347773
2019-09-20	1900-01-02 08:02:26	0.2818	0.321494	0.334845	0.417973	0.241119	0.351326	0.244036	0.279237
2019-09-20	1900-01-02 08:22:26	0.286187	0.258848	0.28335	0.38142	0.303558	0.24491	0.283997	0.268474
2019-09-20	1900-01-02 08:42:26	0.373717	0.208575	0.250256	0.350996	0.251354	0.258155	0.318251	0.381918
2019-09-20	1900-01-02 09:02:26	0.361854	0.27301	0.485243	0.313333	0.375768	0.300376	0.263707	0.302164
2019-09-20	1900-01-02 09:22:26	0.323866	0.466586	0.291099	0.3279	0.253516	0.298642	0.336008	0.301765
2019-09-20	1900-01-02 09:42:26	0.303274	0.410243	0.25726	0.35444	0.277987	0.373627	0.360137	0.304716
2019-09-20	1900-01-02 10:02:26	0.292353	0.243284	0.410153	0.28413	0.35933	0.237352	0.384729	0.317904
2019-09-20	1900-01-02 10:22:26	0.272785	0.226882	0.358553	0.28911	0.339226	0.278204	0.28364	0.285365
2019-09-20	1900-01-02 10:42:26	0.289782	0.226356	0.228661	0.257646	0.331277	0.444494	0.307266	0.253645
2019-09-20	1900-01-02 11:02:26	0.267085	0.246582	0.360525	0.2695	0.285884	0.304914	0.284329	0.268124
2019-09-20	1900-01-02 11:22:26	0.383868	0.329409	0.231851	0.257096	0.269948	0.250222	0.376718	0.278378
2019-09-20	1900-01-02 11:42:26	0.354334	0.226683	0.250217	0.388729	0.255694	0.254429	0.356692	0.395468
2019-09-20	1900-01-02 12:02:26	0.26894	0.301144	0.493919	0.267479	0.217772	0.269403	0.260478	0.232979
2019-09-20	1900-01-02 12:22:26	0.267122	0.213411	0.306648	0.288832	0.296043	0.352509	0.301997	0.298884
2019-09-20	1900-01-02 12:42:26	0.284921	0.245004	0.271162	0.389067	0.400202	0.235067	0.306737	0.256338
2019-09-20	1900-01-02 13:02:26	0.308151	0.41433	0.266827	0.313649	0.329136	0.333933	0.296676	0.234642
2019-09-20	1900-01-02 13:22:26	0.258241	0.182564	0.446303	0.387562	0.258684	0.236765	0.280871	0.257412
2019-09-20	1900-01-02 13:42:26	0.286984	0.225009	0.245692	0.255517	0.340354	0.293931	0.382447	0.383437
2019-09-20	1900-01-02 14:02:26	0.289262	0.253151	0.41814	0.271223	0.24949	0.285087	0.278933	0.353449
2019-09-20	1900-01-02 14:22:26	0.394899	0.45252	0.451331	0.415789	0.254476	0.348204	0.270698	0.287401
2019-09-20	1900-01-02 14:42:26	0.330438	0.352367	0.412754	0.304107	0.354471	0.367665	0.285288	0.285246
2019-09-20	1900-01-02 15:02:26	0.303391	0.213517	0.279157	0.306193	0.268654	0.219765	0.280743	0.267835
2019-09-20	1900-01-02 15:22:26	0.296824	0.243742	0.271014	0.290664	0.283538	0.266274	0.298026	0.375561
2019-09-20	1900-01-02 15:42:26	0.371094	0.293745	0.292321	0.309608	0.401368	0.249774	0.300626	0.363298
2019-09-20	1900-01-01 16:02:26	0.246508	0.226959	0.277806	0.383495	0.29783	0.25506	0.411933	0.275578

## Sheet: fat oxidation-LBM
	Groups:	Group 1:	1
Computer	ID#:	310	306	307	798	308	309	312	NT
Date/Clock	BW (g) in:	25.9	27.3	25.4	23	20.5	22.2	20.9	20.6
Time	LBM(g)out:	17.4	18.1	16.8	14.6	12.6	13.8	13.1	12.7
2019-09-15	17:02:26	1.98199	2.09882	1.44767	1.9156	1.75663	2.64485	2.39332	1.90321
2019-09-15	17:22:26	1.35291	1.6745	1.70026	2.53031	1.72219	2.32375	1.42587	1.98185
2019-09-15	17:42:26	1.66877	1.83682	1.20594	1.45529	1.09646	2.33783	1.98272	2.76568
2019-09-15	18:02:26	1.22131	1.11349	1.55088	3.41378	1.13665	1.521	1.9096	2.00544
2019-09-15	18:22:26	1.54506	1.15335	1.67582	2.09859	1.6533	1.52945	2.77581	2.11555
2019-09-15	18:42:26	1.07917	1.17044	1.3526	2.39307	1.16535	2.39135	2.78706	2.0369
2019-09-15	19:02:26	1.47399	2.5146	1.04026	2.27299	0.81517	2.535	2.42988	2.77879
2019-09-15	19:22:26	2.21099	1.27296	1.37162	1.78694	1.151	1.45622	1.96866	1.5493
2019-09-15	19:42:26	1.83722	2.0618	1.58347	2.94202	1.27729	1.67592	1.78304	2.71325
2019-09-15	20:02:26	1.54243	1.98491	1.61878	2.17578	1.53275	2.28432	1.33025	2.56382
2019-09-15	20:22:26	1.87934	2.07034	1.03211	3.06211	1.42368	2.26178	1.75492	2.0972
2019-09-15	20:42:26	1.13971	1.71152	1.29557	1.83555	0.915631	2.18855	1.58336	1.47066
2019-09-15	21:02:26	1.26868	2.2526	0.9126	2.16435	1.01322	2.02518	1.03214	1.46804
2019-09-15	21:22:26	0.973887	1.30998	1.521	1.76407	0.938594	1.94068	0.989953	1.18492
2019-09-15	21:42:26	0.405347	1.10494	1.59433	2.67327	0.599896	0.994283	0.742465	1.04598
2019-09-15	22:02:26	0.442197	2.24691	1.21408	1.78123	0.708968	0.968933	0.970266	1.57814
2019-09-15	22:22:26	0.33428	1.92226	0.994082	1.3981	0.671654	1.6055	0.818399	1.77213
2019-09-15	22:42:26	0.268477	2.02193	1.31458	1.22656	0.519527	1.09005	0.517475	1.43396
2019-09-15	23:02:26	0.381658	2.09882	1.21952	1.93276	1.05628	1.11258	0.554036	1.39464
2019-09-15	23:22:26	0.121078	1.32707	1.36347	1.09218	0.763504	1.09005	0.68903	1.18229
2019-09-15	23:42:26	0.376394	1.21885	1.08914	1.2094	0.433418	0.771767	0.838085	1.62008
2019-09-16	1900-01-01 00:02:26	0.24742	0.737578	0.82297	0.849156	0.90128	0.673183	0.821211	0.899173
2019-09-16	1900-01-01 00:22:26	0.0684353	2.3779	1.26026	1.1608	0.439159	0.673183	0.852147	0.933253
2019-09-16	1900-01-01 00:42:26	0.194777	2.39214	1.76816	1.04929	0.918502	0.7098	0.930893	0.741883
2019-09-16	1900-01-01 01:02:26	0.347441	2.40069	1.2331	1.76121	0.714709	0.115483	1.04058	0.880823
2019-09-16	1900-01-01 01:22:26	0.239524	1.89093	1.39606	1.00069	0.99887	0.2704	0.714341	0.474491
2019-09-16	1900-01-01 01:42:26	0.163192	1.16759	1.34717	1.2237	0.754893	1.10695	0.899957	0.655374
2019-09-16	1900-01-01 02:02:26	0.118446	1.7343	1.46125	1.17223	0.72619	0.470383	1.20932	0.191369
2019-09-16	1900-01-01 02:22:26	0.021057	1.45807	1.30915	0.954943	0.53962	0.568967	0.15468	1.00141
2019-09-16	1900-01-01 02:42:26	0.0394819	0.902749	0.795809	1.38667	0.238236	0.157733	0.615908	0.616052
2019-09-16	1900-01-01 03:02:26	0.0500104	0.973944	0.627413	0.754805	0.763504	0.2704	0.548411	0.616052
2019-09-16	1900-01-01 03:22:26	0.194777	0.899902	1.16519	0.7691	0.203793	-0.0112667	0.275612	0.938496
2019-09-16	1900-01-01 03:42:26	-0.0447461	2.26115	1.01038	0.817705	0.126294	-0.0309833	0.182804	0.33293
2019-09-16	1900-01-01 04:02:26	0.289534	2.23267	0.602968	0.791973	0.479343	0.239417	0.390919	0.618673
2019-09-16	1900-01-01 04:22:26	0.021057	0.740425	0.839266	0.466035	0.44777	0.2704	0.365608	0.639645
2019-09-16	1900-01-01 04:42:26	0.0605389	1.2274	0.689882	0.694764	0.54249	0.2873	0.306548	0.249042
2019-09-16	1900-01-01 05:02:26	-0.00526425	1.12488	0.727907	0.500344	0.255458	0.360533	0.112495	0.867715
2019-09-16	1900-01-01 05:22:26	0.150031	0.791686	0.554079	0.80341	0.574063	0.0507	0.551224	0.768098
2019-09-16	1900-01-01 05:42:26	0.113181	0.506907	0.483461	0.80341	0.404715	0.676	0.0731215	0.49022
2019-09-16	1900-01-01 06:02:26	0.318487	0.808772	0.507905	0.763382	0.797948	0.814017	0.528725	0.453519
2019-09-16	1900-01-01 06:22:26	0	0.717643	1.02939	0.411712	0.390363	-0.0563333	0.354358	0.702561
2019-09-16	1900-01-01 06:42:26	0.131606	0.65784	0.687166	0.829142	0.697487	0.332367	0.109682	0.445654
2019-09-16	1900-01-01 07:02:26	0.12371	0.546776	0.459016	0.80341	0.895539	0.239417	0.466853	0.602944
2019-09-16	1900-01-01 07:22:26	-0.0368498	0.424321	0.795809	0.48319	0.508046	0.323917	0.596222	0.78907
2019-09-16	1900-01-01 07:42:26	0.360601	0.800229	1.4531	0.305925	0.731931	0.1859	0.185616	0.45614
2019-09-16	1900-01-01 08:02:26	0.352705	0.447103	0.782229	0.471753	0.797948	0.273217	0.447166	0.734019
2019-09-16	1900-01-01 08:22:26	0.200042	0.190802	0.665438	0.403134	0.625729	0.140833	0.348733	0.602944
2019-09-16	1900-01-01 08:42:26	0.279005	0.227823	0.82297	0.311643	1.13665	0.3042	0.191241	0.50857
2019-09-16	1900-01-01 09:02:26	0.394819	0.353126	1.20865	0.526076	0.754893	0.484467	0.376857	1.26618
2019-09-16	1900-01-01 09:22:26	0.510633	0.330344	0.923464	1.64399	1.48969	1.63648	1.03214	1.28191
2019-09-16	1900-01-01 09:42:26	0.873866	1.23025	0.578523	0.680468	0.654432	0.588683	0.441542	0.880823
2019-09-16	1900-01-01 10:02:26	0.465886	0.646448	0.592104	0.646159	0.752023	0.445033	0.764964	0.555757
2019-09-16	1900-01-01 10:22:26	0.826488	0.754664	1.2847	1.02356	0.838133	0.9633	0.171554	1.32648
2019-09-16	1900-01-01 10:42:26	1.10286	0.723339	0.847414	1.29804	0.622859	0.428133	0.413418	0.891309
2019-09-16	1900-01-01 11:02:26	0.794902	0.561015	0.429139	0.800551	0.482213	0.442217	0.613096	0.783827
2019-09-16	1900-01-01 11:22:26	0.813327	0.355974	0.440004	0.894901	0.924242	0.983017	0.674968	1.10627
2019-09-16	1900-01-01 11:42:26	1.05811	0.205041	0.502473	0.863451	0.548231	0.577417	0.809962	0.82315
2019-09-16	1900-01-01 12:02:26	1.0081	0.860033	0.869143	0.83486	0.588415	0.3549	0.174367	0.77072
2019-09-16	1900-01-01 12:22:26	0.739628	0.763208	0.616548	0.691905	0.44777	0.901333	0.708716	0.962089
2019-09-16	1900-01-01 12:42:26	0.402715	0.578101	0.502473	0.73765	0.766375	0.890067	0.801524	0.815285
2019-09-16	1900-01-01 13:02:26	0.639607	0.848641	0.939761	0.731932	0.909891	0.484467	1.83648	1.20327
2019-09-16	1900-01-01 13:22:26	0.45799	1.05938	0.950625	0.543231	0.680265	1.18018	0.511851	0.757612
2019-09-16	1900-01-01 13:42:26	0.410612	1.38687	0.83655	0.80341	0.90128	1.47312	0.506226	0.587215
2019-09-16	1900-01-01 14:02:26	0.486943	0.361669	0.478029	0.820564	0.918502	1.24778	1.10526	1.37629
2019-09-16	1900-01-01 14:22:26	0.523793	0.61797	0.540498	1.17509	0.619989	1.88998	1.15307	1.10365
2019-09-16	1900-01-01 14:42:26	0.423772	0.589493	0.486177	1.23514	0.668784	0.5408	0.708716	0.545271
2019-09-16	1900-01-01 15:02:26	0.518529	0.78599	0.937045	1.00069	0.387493	0.495733	0.964642	0.705182
2019-09-16	1900-01-01 15:22:26	0.357969	0.535385	0.809389	0.774819	0.553971	0.5408	0.759339	0.925388
2019-09-16	1900-01-01 15:42:26	0.115814	0.766056	0.268891	0.849156	0.651562	0.774583	0.742465	0.35128
2019-09-16	1900-01-01 16:02:26	0.0947566	0.936923	0.53235	1.02642	1.15961	0.88725	0.697467	0.720911
2019-09-16	1900-01-01 16:22:26	0.244788	1.478	0.377534	0.93207	0.114813	1.07597	1.00401	0.343416
2019-09-16	1900-01-01 16:42:26	0.539586	0.586645	1.22495	2.36162	0.947205	1.29848	1.12495	1.32386
2019-09-16	1900-01-01 17:02:26	0.508	1.06223	0.801241	1.43527	0.602767	0.9802	1.17557	0.193991
2019-09-16	1900-01-01 17:22:26	0.781742	0.791686	0.83655	1.96993	0.973038	1.0478	1.41462	0.477112
2019-09-16	1900-01-01 17:42:26	0.155295	1.51787	0.480745	1.00641	0.602767	1.1999	1.10245	0.744505
2019-09-16	1900-01-01 18:02:26	0.436933	0.444255	0.798525	1.52676	0.264069	1.40552	0.0112495	0.555757
2019-09-16	1900-01-01 18:22:26	0.66856	1.01097	0.404695	1.21512	0.708968	1.12103	0.539974	0.296229
2019-09-16	1900-01-01 18:42:26	0.63171	0.857185	0.450868	0.954943	0.470732	0.611217	0.520288	0.435168
2019-09-16	1900-01-01 19:02:26	0.207938	1.0366	0.423707	0.54609	0.387493	0.349267	0.402168	0.791692
2019-09-16	1900-01-01 19:22:26	0.242156	1.89378	0.494325	0.789114	0.410455	0.461933	0.466853	0.125832
2019-09-16	1900-01-01 19:42:26	0.218466	0.919836	0.461732	0.820564	0.602767	0.695717	0.365608	0.574108
2019-09-16	1900-01-01 20:02:26	0.389555	0.766056	0.157532	0.934929	0.353049	0.4563	0.348733	0.35128
2019-09-16	1900-01-01 20:22:26	0.355337	0.689165	0.306916	1.22942	0.510917	0.4563	0.537162	0.492841
2019-09-16	1900-01-01 20:42:26	0.147399	0.629362	0.385682	1.05787	0.120553	0.478833	0.655281	0.760234
2019-09-16	1900-01-01 21:02:26	-0.128974	0.629362	0.344941	0.849156	0.353049	0.484467	0.258738	0.540028
2019-09-16	1900-01-01 21:22:26	-0.0236891	0.543928	0.21457	1.16652	0.327216	0.630933	-0.224989	0.574108
2019-09-16	1900-01-01 21:42:26	0.16056	0.606579	0.258027	0.691905	0.221014	0.259133	0.41623	0.694696
2019-09-16	1900-01-01 22:02:26	-0.0526425	0.21928	0.31778	1.13793	0.284161	0.3549	0.0871834	0.469248
2019-09-16	1900-01-01 22:22:26	0.0684353	0.293322	-0.038025	0.96352	0.26694	0.149283	-0.163117	0.479734
2019-09-16	1900-01-01 22:42:26	0.294798	0.338887	0.217286	0.405994	0.485084	0.323917	-0.0196866	0.762855
2019-09-16	1900-01-01 23:02:26	0.0342176	0.444255	0.157532	0.534653	0.100461	0.0281667	0.241864	0.534785
2019-09-16	1900-01-01 23:22:26	0.0789638	0.435712	0.149384	1.02642	0.407585	0.301383	0.539974	0.325066
2019-09-16	1900-01-01 23:42:26	0.118446	0.81162	0.355805	0.783396	0.327216	-0.0225333	0.750902	0.241178
2019-09-17	1900-01-02 00:02:26	0.0236891	0.327496	0.217286	0.811987	0.175089	0.2366	0.565286	0.0681589
2019-09-17	1900-01-02 00:22:26	0.310591	0.726186	0.358521	0.686186	0.0143516	0.183083	-0.224989	0.207098
2019-09-17	1900-01-02 00:42:26	0.331648	0.600884	0.301484	0.860592	0.528138	-0.0788667	0.345921	0.390603
2019-09-17	1900-01-02 01:02:26	0.194777	0.635057	0.450868	0.494626	0.143516	-0.0676	0.703092	0.482355
2019-09-17	1900-01-02 01:22:26	-0.152663	0.330344	0.247163	0.617568	0.0889798	-0.0112667	0.489352	0.196612
2019-09-17	1900-01-02 01:42:26	0.29743	0.783142	0.551363	0.486049	-0.0688876	0.267583	0.317797	0.50857
2019-09-17	1900-01-02 02:02:26	0.0658032	1.0309	0.909884	1.00355	0.132035	0.31265	0.576535	0.283122
2019-09-17	1900-01-02 02:22:26	0.0579068	0.871424	0.36667	0.760523	0.396104	0.0535167	-0.00281237	0.807421
2019-09-17	1900-01-02 02:42:26	0.142135	0.985335	0.611116	0.554667	0.324346	0.154917	0.326235	0.744505
2019-09-17	1900-01-02 03:02:26	0.218466	0.828707	0.0570375	1.11219	0.470732	0.27885	0.64122	0.427304
2019-09-17	1900-01-02 03:22:26	0.28427	0.583797	0.347657	0.914915	0.419066	0.26195	0.241864	0.605566
2019-09-17	1900-01-02 03:42:26	0.252684	1.05653	0.4563	0.506062	0.27555	-0.0676	0.241864	0.0602944
2019-09-17	1900-01-02 04:02:26	-0.0289534	0.56671	0.581239	0.766241	0.295643	0.154917	0.615908	0.290986
2019-09-17	1900-01-02 04:22:26	0.084228	0.763208	0.575807	0.7062	0.668784	-0.0647833	0.382482	1.12724
2019-09-17	1900-01-02 04:42:26	0.110549	0.54108	0.619264	0.809128	0.330087	0.0957667	0.683405	0.422061
2019-09-17	1900-01-02 05:02:26	0.286902	0.689165	0.562227	0.791973	0.485084	0.476017	-0.174367	0.768098
2019-09-17	1900-01-02 05:22:26	0.321119	0.768903	0.130371	0.631863	0.519527	0.233783	0.0759339	1.24259
2019-09-17	1900-01-02 05:42:26	0.352705	0.956857	0.263459	0.894901	0.760634	0.318283	0.303736	0.741883
2019-09-17	1900-01-01 06:02:26	0.310591	0.666383	0.160248	0.460317	1.36914	0.166183	0.596222	1.46804
2019-09-17	1900-01-01 06:22:26	0.352705	0.609427	0.260743	0.840578	1.2285	0.48165	0.554036	0.445654
2019-09-17	1900-01-01 06:42:26	0.265845	0.919836	0.149384	0.974956	0.674525	0.2535	0.568098	0.943739
2019-09-17	1900-01-01 07:02:26	0.450094	0.791686	0.244446	0.806269	0.683136	0.5577	0.607471	1.23472
2019-09-17	1900-01-01 07:22:26	0.789638	1.72576	0.334077	0.660454	0.987389	0.419683	1.12495	1.07219
2019-09-17	1900-01-01 07:42:26	0.471151	1.30998	0.516054	1.81553	0.90415	0.797117	0.208115	1.23997
2019-09-17	1900-01-01 08:02:26	0.673824	0.663535	0.784945	0.892042	1.28016	0.8281	0.179991	1.22162
2019-09-17	1900-01-01 08:22:26	0.600125	0.398691	0.516054	0.980675	0.619989	0.61685	0.838085	0.933253
2019-09-17	1900-01-01 08:42:26	0.910716	0.333191	0.344941	0.694764	0.858225	1.0478	0.708716	0.511192
2019-09-17	1900-01-01 09:02:26	0.644871	0.620818	0.429139	1.0979	0.841003	1.02527	0.703092	1.34221
2019-09-17	1900-01-01 09:22:26	0.16056	1.13912	0.725191	0.806269	1.37775	1.39425	0.883083	1.47066
2019-09-17	1900-01-01 09:42:26	0.736995	0.746121	0.298768	2.37592	1.84274	1.30975	1.24307	1.37366
2019-09-17	1900-01-01 10:02:26	1.38187	0.825859	0.89902	1.45815	1.31748	0.749233	1.54399	1.12724
2019-09-17	1900-01-01 10:22:26	0.887027	0.555319	1.01309	1.11219	0.729061	0.653467	1.25432	1.75902
2019-09-17	1900-01-01 10:42:26	1.00021	0.341735	0.377534	1.40954	1.08211	1.19708	1.42025	0.230692
2019-09-17	1900-01-01 11:02:26	1.12918	1.42959	0.44272	0.90062	0.846744	0.374617	1.67617	1.12462
2019-09-17	1900-01-01 11:22:26	1.43188	0.481277	0.592104	1.04357	0.832392	0.673183	0.587785	0.589837
2019-09-17	1900-01-01 11:42:26	0.826488	0.472733	0.831118	1.26087	0.746283	0.233783	0.509038	0.644888
2019-09-17	1900-01-01 12:02:26	0.765949	0.418625	0.736055	1.44957	1.04193	0.71825	0.565286	0.901795
2019-09-17	1900-01-01 12:22:26	0.697514	0.452799	0.507905	1.10076	0.617118	0.740783	0.705904	0.61343
2019-09-17	1900-01-01 12:42:26	1.16603	0.586645	0.350373	1.6011	0.694617	0.906967	0.67778	0.304094
2019-09-17	1900-01-01 13:02:26	0.960726	0.908445	0.494325	0.937788	0.737672	1.5379	1.2965	0.545271
2019-09-17	1900-01-01 13:22:26	0.984415	0.509754	0.328645	1.10076	0.929983	0.8788	1.09401	0.933253
2019-09-17	1900-01-01 13:42:26	0.958094	0.486972	0.782229	1.12363	0.72332	0.507	0.731215	1.11151
2019-09-17	1900-01-01 14:02:26	0.53169	1.32992	0.964205	1.25515	0.881187	0.87035	0.371232	0.828393
2019-09-17	1900-01-01 14:22:26	0.536954	0.897054	0.472596	1.19225	1.49257	1.0647	0.317797	1.122
2019-09-17	1900-01-01 14:42:26	0.379026	0.615123	0.635561	1.2237	1.58442	1.19708	0.897145	0.616052
2019-09-17	1900-01-01 15:02:26	0.439565	0.942619	1.30371	1.51247	1.30886	1.4365	1.23463	0.783827
2019-09-17	1900-01-01 15:22:26	0.810695	1.75139	0.920748	1.89273	0.53962	0.690083	0.95058	0.917524
2019-09-17	1900-01-01 15:42:26	0.726467	0.461342	0.53235	0.929211	1.09072	0.335183	1.35275	0.492841
2019-09-17	1900-01-01 16:02:26	0.700146	0.575254	0.825686	0.640441	1.39497	0.284483	1.38368	0.395846
2019-09-17	1900-01-01 16:22:26	0.584332	0.512602	0.841982	1.45529	1.55571	0.5577	1.1137	0.495463
2019-09-17	1900-01-01 16:42:26	0.744892	2.3893	0.893587	1.10933	1.99774	1.64493	0.801524	1.39726
2019-09-17	1900-01-01 17:02:26	0.38429	0.81162	0.613832	2.02711	0.958686	0.281667	0.466853	1.4025
2019-09-17	1900-01-01 17:22:26	0.471151	0.911293	0.828402	2.19008	0.663043	0.146467	0.469665	0.393224
2019-09-17	1900-01-01 17:42:26	0.876498	0.637905	0.947909	1.97279	1.24572	0.385883	0.160305	0.663239
2019-09-17	1900-01-01 18:02:26	0.660664	0.595188	0.516054	1.70117	0.81804	0.38025	0.365608	0.655374
2019-09-17	1900-01-01 18:22:26	0.881762	0.318952	0.486177	1.47244	0.823781	0.763317	0.587785	0.844122
2019-09-17	1900-01-01 18:42:26	0.884394	1.01951	0.268891	1.61826	0.430548	0.664733	0.506226	0.794313
2019-09-17	1900-01-01 19:02:26	0.0789638	0.310409	0.4563	1.38095	0.493695	0.51545	0.15468	0.791692
2019-09-17	1900-01-01 19:22:26	0.365866	0.686317	0.361238	1.05215	0.373141	0.3887	0.30936	0.10486
2019-09-17	1900-01-01 19:42:26	0.307959	0.751817	0.222718	1.26373	0.597026	0.0647833	0.267175	0.592458
2019-09-17	1900-01-01 20:02:26	0.271109	0.449951	0.0950625	0.863451	0.221014	0.512633	0.132181	0.212341
2019-09-17	1900-01-01 20:22:26	-0.0131606	0.122455	0.271607	0.640441	-0.335827	0.1859	-0.224989	0.0445654
2019-09-17	1900-01-01 20:42:26	0.410612	0.182259	0.0814821	0.586117	0.553971	0.529533	0.199678	0.540028
2019-09-17	1900-01-01 21:02:26	0.0236891	0.353126	0.0896304	0.809128	0.571193	0.0732333	0.185616	0.275257
2019-09-17	1900-01-01 21:22:26	0.239524	0.287627	0.230866	0.614709	0.292772	0.335183	0.199678	0.424682
2019-09-17	1900-01-01 21:42:26	0.0684353	0.310409	0.513338	0.57754	0.505176	0.197167	-0.0393731	0.220206
2019-09-17	1900-01-01 22:02:26	0.184249	0.484124	-0.0135804	0.789114	0.18083	0.411233	-0.0393731	0.799556
2019-09-17	1900-01-01 22:22:26	0.0184249	0.19365	0.149384	0.603272	0.344438	0.0338	0.565286	0.382738
2019-09-17	1900-01-01 22:42:26	-0.0921244	0.381604	0.244446	0.571822	0.45064	-0.04225	0.0562473	0.380117
2019-09-17	1900-01-01 23:02:26	0.0105285	0.478429	0.157532	0.403134	0.318605	0.191533	0.0787463	0.600323
2019-09-17	1900-01-01 23:22:26	-0.126342	0.0768903	0.0488893	0.631863	0.18083	0.121117	-0.177179	0.222827
2019-09-17	1900-01-01 23:42:26	0.355337	0.68347	0.59482	0.620427	0.387493	0.197167	-0.0196866	0.422061
2019-09-18	1900-01-02 00:02:26	0.107917	0.304714	0.757784	0.852015	0.223885	0.138017	0.0984328	0.524299
2019-09-18	1900-01-02 00:22:26	0.200042	0.535385	0.222718	0.903479	0.367401	0.104217	0.194053	0.482355
2019-09-18	1900-01-02 00:42:26	0.215834	0.310409	0.551362	0.80341	0.439159	0.267583	0.58216	0.188748
2019-09-18	1900-01-02 01:02:26	-0.0236891	0.128151	0.412843	1.05215	0.510917	-0.0140833	0.30936	0.710425
2019-09-18	1900-01-02 01:22:26	0.413244	0.546776	0.1521	1.21226	0.0287032	-0.0957667	0.348733	0.663239
2019-09-18	1900-01-02 01:42:26	0.113181	0.199345	0.29062	1.98994	0.444899	0.0478833	0.0928081	0.382738
2019-09-18	1900-01-02 02:02:26	0.115814	0.529689	0.459016	1.50675	0.536749	0.05915	0.236239	0.380117
2019-09-18	1900-01-02 02:22:26	0.0815959	0.521146	0.0841982	1.71261	0.318605	0.8619	0.143431	0.563622
2019-09-18	1900-01-02 02:42:26	0.139503	0.652144	0.3042	1.49817	0.160738	0.323917	0.430292	0.477112
2019-09-18	1900-01-02 03:02:26	0.231627	0.37306	0.260743	0.934929	0.120553	0.3042	0.601846	0.749748
2019-09-18	1900-01-02 03:22:26	0.00526425	0.327496	0.203705	1.49246	0.117683	0.121117	0.244676	0.605566
2019-09-18	1900-01-02 03:42:26	-0.0684353	0.370213	0.203705	1.19797	0.706098	0.242233	0.793087	1.01452
2019-09-18	1900-01-02 04:02:26	-0.0947566	0.580949	0.412843	1.05501	0.536749	-0.163367	0.944955	0.317201
2019-09-18	1900-01-02 04:22:26	-0.063171	0.726186	1.01038	2.13004	0.703228	0.323917	0.759339	0.406332
2019-09-18	1900-01-02 04:42:26	0.110549	0.529689	0.654573	2.04426	0.508046	0.318283	0.565286	0.686832
2019-09-18	1900-01-02 05:02:26	0.105285	0.327496	0.624696	0.986393	0.249718	0.338	0.295298	0.941117
2019-09-18	1900-01-02 05:22:26	0.218466	0.612275	0.399263	1.43241	0.35879	0.154917	0.393731	0.597701
2019-09-18	1900-01-02 05:42:26	0.197409	0.353126	0.399262	0.923492	0.671654	0.425317	0.714341	0.985683
2019-09-18	1900-01-02 06:02:26	-0.00789638	0.358822	0.334077	1.65828	1.47534	0.492917	0.542787	0.61343
2019-09-18	1900-01-02 06:22:26	0.307959	1.30714	0.600252	0.588977	-0.063147	0.571783	1.13901	0.22807
2019-09-18	1900-01-02 06:42:26	0.534322	0.21928	0.450868	0.669032	0.318605	0.966117	1.60024	1.18229
2019-09-18	1900-01-02 07:02:26	0.534322	0.392995	0.83655	1.29518	0.229625	0.250683	1.6818	1.49163
2019-09-18	1900-01-02 07:22:26	0.621182	0.572406	0.668154	1.19797	0.950075	0.805567	2.01928	0.600323
2019-09-18	1900-01-02 07:42:26	0.942301	0.737578	0.562227	1.3638	0.72332	0.36335	0.393731	0.94636
2019-09-18	1900-01-02 08:02:26	0.873866	0.865728	0.445436	1.21226	1.13378	0.4563	0.576535	0.8415
2019-09-18	1900-01-02 08:22:26	0.713306	1.25872	0.567659	0.720496	1.34905	0.75205	0.908394	0.644888
2019-09-18	1900-01-02 08:42:26	1.12392	0.504059	0.855563	0.809128	0.717579	0.788667	1.11932	1.10627
2019-09-18	1900-01-02 09:02:26	0.889659	0.41293	1.11087	0.917774	1.50118	1.47593	1.41181	0.92801
2019-09-18	1900-01-02 09:22:26	0.652767	0.526841	1.09458	1.29804	2.0408	1.23652	0.731215	1.14822
2019-09-18	1900-01-02 09:42:26	1.19499	2.30956	1.23038	1.75835	2.26755	2.56035	1.45118	1.683
2019-09-18	1900-01-02 10:02:26	0.855441	1.95074	1.51557	1.54964	1.54136	1.50692	1.21494	1.65416
2019-09-18	1900-01-02 10:22:26	1.12655	1.93935	1.73014	1.96135	1.72219	1.7745	1.88429	2.34886
2019-09-18	1900-01-02 10:42:26	1.28974	2.01054	1.30371	1.66114	1.13378	1.85337	1.75773	1.95564
2019-09-18	1900-01-02 11:02:26	1.25816	1.96213	1.35532	1.50389	1.58442	0.588683	1.37525	1.80097
2019-09-18	1900-01-02 11:22:26	1.46083	2.15578	1.41236	2.19866	1.71358	1.39988	1.59742	1.35793
2019-09-18	1900-01-02 11:42:26	1.58717	2.14723	1.13532	1.31519	1.61025	1.859	1.89835	1.76951
2019-09-18	1900-01-02 12:02:26	1.25552	1.61754	1.21137	1.30661	1.67914	0.554883	1.77742	1.39726
2019-09-18	1900-01-02 12:22:26	1.18446	1.55489	1.35532	1.76407	1.01322	0.746417	1.90678	2.06312
2019-09-18	1900-01-02 12:42:26	1.20025	1.62324	0.871859	1.44099	1.24859	1.00273	2.28927	1.87699
2019-09-18	1900-01-02 13:02:26	1.06864	1.61754	1.24668	1.65828	1.66765	1.45622	1.91803	1.31337
2019-09-18	1900-01-02 13:22:26	1.43451	1.86245	1.28199	1.70117	2.14987	1.24778	1.88147	1.47328
2019-09-18	1900-01-02 13:42:26	1.30027	1.62894	0.980502	1.24943	2.21876	1.90688	2.35395	1.67251
2019-09-18	1900-01-02 14:02:26	0.752788	1.54635	1.38791	1.21798	1.41794	0.63375	1.40337	1.46542
2019-09-18	1900-01-02 14:22:26	1.03179	1.42959	1.38791	1.1465	0.657303	0.681633	0.770588	1.55455
2019-09-18	1900-01-02 14:42:26	0.721203	1.24733	1.66224	1.58109	1.11942	0.923867	1.36962	1.57028
2019-09-18	1900-01-02 15:02:26	1.21078	1.4239	0.765932	1.25229	1.32035	1.14075	1.41462	1.48377
2019-09-18	1900-01-02 15:22:26	1.18972	1.75139	0.74692	1.5382	1.5758	1.02527	1.27119	0.731397
2019-09-18	1900-01-02 15:42:26	1.21341	1.33277	0.918032	2.09573	1.50405	0.681633	1.63398	1.24783
2019-09-18	1900-01-01 16:02:26	0.789638	1.4837	0.768648	0.949224	1.59016	0.754867	1.40056	1.48377
2019-09-18	1900-01-01 16:22:26	0.74226	1.27011	1.11087	1.25515	2.30486	0.966117	0.607471	1.04073
2019-09-18	1900-01-01 16:42:26	1.33186	2.24975	1.49384	1.98994	1.52414	1.71817	1.06589	1.13249
2019-09-18	1900-01-01 17:02:26	1.50558	2.62566	1.30643	1.75835	1.0448	1.03372	0.928081	1.5729
2019-09-18	1900-01-01 17:22:26	1.26868	2.28678	1.40693	1.72404	0.766375	0.93795	1.56368	1.77737
2019-09-18	1900-01-01 17:42:26	1.60033	2.002	1.29013	1.24657	1.35479	1.73225	2.12615	1.84291
2019-09-18	1900-01-01 18:02:26	0.894923	2.10167	1.29013	1.25515	0.614248	0.7774	2.06428	1.64368
2019-09-18	1900-01-01 18:22:26	0.307959	1.50648	0.885439	0.952083	0.924242	1.183	0.565286	1.58601
2019-09-18	1900-01-01 18:42:26	1.08444	1.56059	1.12717	0.751946	0.597026	0.5577	0.587785	1.42872
2019-09-18	1900-01-01 19:02:26	0.921244	2.08458	0.627412	0.926352	1.21988	1.18582	0.545599	1.10627
2019-09-18	1900-01-01 19:22:26	0.110549	1.72291	1.01853	0.849156	0.571193	0.597133	1.05745	1.05384
2019-09-18	1900-01-01 19:42:26	0.205306	1.83113	0.440004	0.751946	0.536749	0.630933	0.7959	0.880823
2019-09-18	1900-01-01 20:02:26	0.315855	1.478	0.252595	0.649018	0.697487	0.487283	0.461228	0.694696
2019-09-18	1900-01-01 20:22:26	0.252684	1.45522	0.4563	0.843437	0.355919	0.509817	0.286861	0.844122
2019-09-18	1900-01-01 20:42:26	0.142135	1.81119	0.418275	0.686186	0.482213	0.943583	0.182804	0.0183505
2019-09-18	1900-01-01 21:02:26	0.110549	1.57198	0.668154	0.271615	0.27555	0.27885	0.20249	0.173019
2019-09-18	1900-01-01 21:22:26	0.213202	1.36124	0.361237	0.303066	-0.0975908	0.0704167	0.32061	0.547893
2019-09-18	1900-01-01 21:42:26	0.118446	1.12488	0.0434571	0.580399	-0.149257	0.368983	0.444354	0.482355
2019-09-18	1900-01-01 22:02:26	-0.0605389	1.2929	0.233582	0.551808	-0.0803689	0.174633	0.149055	-0.0602944
2019-09-18	1900-01-01 22:22:26	-0.115814	1.37548	0.220002	0.809128	0.53962	0.0563333	0.314985	0.201855
2019-09-18	1900-01-01 22:42:26	0.302695	1.17614	0.200989	0.568963	0.26981	0.44785	0.306548	0.398467
2019-09-18	1900-01-01 23:02:26	0.105285	0.68347	0.143952	0.563245	0.324346	0.298567	0.0168742	0.296229
2019-09-18	1900-01-01 23:22:26	0.063171	0.59234	0.39383	0.777678	0.390363	0.377433	0.0112495	0.199234
2019-09-18	1900-01-01 23:42:26	0.318487	0.817316	0.244446	0.491767	0.0430548	0.12675	0.224989	0.568865
2019-09-19	1900-01-02 00:02:26	-0.0500104	0.81162	0.510621	0.35453	0.140646	0.17745	0.599034	0.31458
2019-09-19	1900-01-02 00:22:26	0.213202	0.586645	0.21457	0.586117	0.396104	0.09295	0.666531	0.214963
2019-09-19	1900-01-02 00:42:26	0.255316	0.572406	0.230866	0.474612	0.209533	0.537983	0.466853	0.309337
2019-09-19	1900-01-02 01:02:26	0.0315855	0.521146	0	0.411712	0.192311	-0.0281667	-0.0196866	0.0576729
2019-09-19	1900-01-02 01:22:26	0.126342	0.600884	0.494325	0.954943	0.212403	0.267583	0.0281237	0.256907
2019-09-19	1900-01-02 01:42:26	0.139503	0.478429	0.440004	0.657595	0.703228	0.276033	0.216552	0.348659
2019-09-19	1900-01-02 02:02:26	0.0394819	0.654992	0.423707	0.789114	0.120553	0.205617	0.0196866	0.880823
2019-09-19	1900-01-02 02:22:26	0.0473783	0.432864	0.567659	0.571822	0.117683	0.16055	0.663718	0.390603
2019-09-19	1900-01-02 02:42:26	0.16056	0.179411	0.309632	0.426007	0.54249	-0.09295	0.739652	0.395846
2019-09-19	1900-01-02 03:02:26	0.17372	0.404386	0.937045	0.440303	0.200922	0.1352	0.731215	0.579351
2019-09-19	1900-01-02 03:22:26	0.16056	0.48982	0.353089	0.700482	0.321476	0.239417	0.970266	0.369631
2019-09-19	1900-01-02 03:42:26	0.194777	0.287627	0.157532	0.566104	0.419066	0.208433	1.21494	0.920145
2019-09-19	1900-01-02 04:02:26	0.536954	0.897054	0.535066	0.691905	0.212403	-0.0140833	0.717153	0.471869
2019-09-19	1900-01-02 04:22:26	0.202674	0.341735	0.266175	0.606131	0.0459251	-0.0112667	0.444354	0.201855
2019-09-19	1900-01-02 04:42:26	0.242156	0.159476	0.703462	0.680468	0.26981	-0.2197	0.47529	0.561
2019-09-19	1900-01-02 05:02:26	0.0973887	0.264844	0.277039	0.623286	0.241107	0.0816833	0.562473	0.752369
2019-09-19	1900-01-02 05:22:26	0.473783	0.518298	0.244446	0.723355	0.327216	0.0450667	0.10687	0.387981
2019-09-19	1900-01-02 05:42:26	0.131606	0.432864	0.225434	0.740509	0.470732	0.154917	0.455603	0.521678
2019-09-19	1900-01-02 06:02:26	0.16056	0.3218	0.100495	0.694764	0.338697	-0.0281667	0.793087	0.411575
2019-09-19	1900-01-02 06:22:26	0.184249	0.205041	0.0190125	0.83486	0.703228	0.19435	0.919644	0.367009
2019-09-19	1900-01-02 06:42:26	0.192145	0.139542	0.130371	0.631863	0.774986	0.46475	1.13057	0.193991
2019-09-19	1900-01-02 07:02:26	0.0868602	0.333191	0.415559	1.36665	1.05915	0.146467	1.42306	0.519056
2019-09-19	1900-01-02 07:22:26	0.0157928	0.353126	0.347657	0.660454	1.26007	0.44785	1.41462	0.380117
2019-09-19	1900-01-02 07:42:26	0.779109	0.202193	0.39383	0.874888	1.22563	0.788667	0.781838	0.723533
2019-09-19	1900-01-02 08:02:26	0.207938	0.29617	0.918032	0.903479	1.27729	0.436583	0.835273	1.21375
2019-09-19	1900-01-02 08:22:26	0.155295	0.46419	0.420991	0.89776	1.4122	0.563333	1.13338	0.917524
2019-09-19	1900-01-02 08:42:26	0.28427	0.469885	0.589388	1.14364	1.86571	0.8619	1.63398	0.993547
2019-09-19	1900-01-02 09:02:26	0.605389	0.660687	0.564943	0.83486	1.6533	0.732333	1.47087	0.828393
2019-09-19	1900-01-02 09:22:26	0.679089	0.595188	0.448152	1.13507	1.39784	1.2675	1.74085	0.752369
2019-09-19	1900-01-02 09:42:26	0.634342	0.666383	0.673586	0.906338	1.89728	1.56325	2.32583	1.0486
2019-09-19	1900-01-02 10:02:26	0.994944	1.69728	1.26569	0.846296	1.73941	0.994283	2.0249	1.30551
2019-09-19	1900-01-02 10:22:26	1.68193	1.93935	1.31186	1.28374	2.15561	1.30693	1.98553	1.38939
2019-09-19	1900-01-02 10:42:26	1.29501	1.75993	1.42051	1.24085	2.04654	1.0985	2.0024	2.02117
2019-09-19	1900-01-02 11:02:26	1.45293	1.94504	1.61606	1.62112	1.98913	1.2844	1.74367	1.89272
2019-09-19	1900-01-02 11:22:26	1.29764	1.45807	1.34446	1.65828	2.6694	1.2675	1.86179	1.65679
2019-09-19	1900-01-02 11:42:26	0.944933	1.13912	1.23038	1.58395	1.37775	0.54925	1.5018	1.56503
2019-09-19	1900-01-02 12:02:26	1.48978	1.61185	1.19779	1.69831	1.89154	1.01682	1.10245	1.93466
2019-09-19	1900-01-02 12:22:26	1.51347	1.37263	1.21952	1.82125	2.11829	1.69563	1.409	1.8298
2019-09-19	1900-01-02 12:42:26	1.42661	1.38403	1.42322	1.68687	2.23885	1.39143	1.229	1.18229
2019-09-19	1900-01-02 13:02:26	1.68719	1.75424	0.673586	1.30375	0.763504	0.326733	1.88991	1.20589
2019-09-19	1900-01-02 13:22:26	1.47136	1.34416	0.578523	1.81839	1.19979	0.605583	1.41181	1.86126
2019-09-19	1900-01-02 13:42:26	1.78195	1.49509	0.6084	1.8041	1.5758	0.890067	1.83366	1.57028
2019-09-19	1900-01-02 14:02:26	1.46346	1.33846	0.431855	1.40668	1.8858	1.25905	1.70992	1.73281
2019-09-19	1900-01-02 14:22:26	1.65824	1.47516	0.540498	0.797692	1.93459	0.845	2.05303	1.28715
2019-09-19	1900-01-02 14:42:26	1.43977	1.07931	0.820254	1.0836	0.677395	1.2506	1.33869	2.23876
2019-09-19	1900-01-02 15:02:26	2.20835	1.46661	0.679018	1.35236	0.823781	1.7069	0.863396	2.1339
2019-09-19	1900-01-02 15:22:26	1.02916	1.75993	0.564943	1.31805	0.367401	1.31257	1.09682	1.59125
2019-09-19	1900-01-02 15:42:26	0.368498	1.01097	0.744204	1.82697	0.855355	1.61113	1.49899	1.93204
2019-09-19	1900-01-01 16:22:26	0.594861	1.53781	1.10272	1.94134	1.07637	0.9802	1.66492	1.90058
2019-09-19	1900-01-01 16:42:26	0.497472	1.09355	0.4563	0.840578	1.37775	0.6084	1.52149	2.10506
2019-09-19	1900-01-01 17:02:26	1.54243	1.53211	1.23853	1.27516	1.8083	0.4563	1.60305	1.67514
2019-09-19	1900-01-01 17:22:26	1.02916	1.06792	1.39334	0.86631	0.895539	0.797117	1.08276	2.18108
2019-09-19	1900-01-01 17:42:26	1.31606	1.04514	1.29013	1.04643	2.22163	1.28722	1.65367	1.95564
2019-09-19	1900-01-01 18:02:26	1.2292	1.13342	1.79532	0.83486	1.27155	1.40552	1.42025	1.59911
2019-09-19	1900-01-01 18:22:26	1.40556	1.19322	1.08914	0.949224	1.43516	1.4365	0.984328	2.00544
2019-09-19	1900-01-01 18:42:26	1.22131	1.60331	0.934329	0.443162	0.878317	0.754867	1.18401	1.09054
2019-09-19	1900-01-01 19:02:26	1.0897	1.34131	0.478029	0.557526	1.28877	1.18863	0.486539	1.70135
2019-09-19	1900-01-01 19:22:26	0.410612	1.96213	0.611116	0.463176	0.688876	1.7745	0.210927	1.03287
2019-09-19	1900-01-01 19:42:26	0.673824	1.44668	0.575807	0.671891	0.516657	0.628117	0.511851	0.833636
2019-09-19	1900-01-01 20:02:26	0.289534	1.83113	0.554079	0.629004	0.737672	0.425317	0.306548	0.484977
2019-09-19	1900-01-01 20:22:26	0.415876	0.703404	0.377534	0.303066	0.691747	0.622483	0.0871834	0.689453
2019-09-19	1900-01-01 20:42:26	0.513265	0.845794	0.168396	0.437444	0.413326	0.442217	0.32061	0.411575
2019-09-19	1900-01-01 21:02:26	0.213202	0.768903	0.239014	0.414571	0.843873	0.546433	0.618721	0.597701
2019-09-19	1900-01-01 21:22:26	0.38429	1.01951	0.24173	0.568963	0.373141	0.0985833	0.2728	0.254285
2019-09-19	1900-01-01 21:42:26	0.142135	0.936923	0.135804	0.383121	0.0459251	-0.273217	0.0646844	0.663239
2019-09-19	1900-01-01 22:02:26	0.313223	0.449951	0.271607	0.474612	0.556842	0.315467	0.371232	0.317201
2019-09-19	1900-01-01 22:22:26	0.205306	0.694861	0.133088	0.337375	0.203793	0.0507	0.359983	0.461383
2019-09-19	1900-01-01 22:42:26	0.234259	0.740425	0.676302	0.746228	0.640081	0.0197167	0.703092	0.710425
2019-09-19	1900-01-01 23:02:26	0.00789638	0.267692	0.459016	0.457458	0.674525	-0.0112667	0.489352	0.558379
2019-09-19	1900-01-01 23:22:26	0.0947566	0.21928	0.195557	0.491767	0.404715	0.24505	-0.030936	0.110103
2019-09-19	1900-01-01 23:42:26	0.136871	0.344583	0.708895	0.434585	0.574063	-0.138017	0.42748	0.154668
2019-09-20	1900-01-02 00:02:26	0.0710674	0.21928	0.372102	0.408853	0.100461	-0.239417	0.331859	0.196612
2019-09-20	1900-01-02 00:22:26	0.126342	0.301866	0.190125	0.606131	0.338697	0.2704	0.118119	-0.162533
2019-09-20	1900-01-02 00:42:26	0.189513	0.390147	0.505189	0.497485	0.602767	0.1183	0.143431	0.0760234
2019-09-20	1900-01-02 01:02:26	0.0763317	0.276236	0.613832	0.6433	0.370271	0.1014	0.222177	0.458762
2019-09-20	1900-01-02 01:22:26	0.200042	0.119607	0.431855	1.00641	0.579804	-0.09295	0.191241	0.304094
2019-09-20	1900-01-02 01:42:26	0.171088	0.674926	0.149384	1.05501	0.26694	-0.0309833	0.0956205	0.0393224
2019-09-20	1900-01-02 02:02:26	0.0552747	0.387299	0.124939	0.348811	0.691747	0.197167	0.222177	0.304094
2019-09-20	1900-01-02 02:22:26	0.121078	0.222128	0.407411	0.7691	0.597026	0.208433	0.084371	0.492841
2019-09-20	1900-01-02 02:42:26	0.207938	0.222128	0.315064	0.894901	0.683136	0.290117	0.269987	0.382738
2019-09-20	1900-01-02 03:02:26	-0.281638	-0.0199345	0.320496	0.786255	0.44777	0.0788667	-0.163117	0.380117
2019-09-20	1900-01-02 03:22:26	0.00789638	0.185106	0.220002	0.99497	0.749153	0.0281667	-0.0871834	0.629159
2019-09-20	1900-01-02 03:42:26	-0.084228	0.0284779	0.135804	0.829142	0.737672	-0.188717	0.455603	0.204477
2019-09-20	1900-01-02 04:02:26	-0.021057	0.173715	0.233582	0.600413	0.786467	-0.104217	0.253113	0.605566
2019-09-20	1900-01-02 04:22:26	0.0789638	0.202193	-0.0543214	0.600413	0.0200922	0.154917	-0.208115	0.872958
2019-09-20	1900-01-02 04:42:26	0.139503	0.586645	0.529634	0.511781	0.772115	0.594317	0.517475	0.854608
2019-09-20	1900-01-02 05:02:26	0.197409	0.430016	0.203705	0.840578	0.63147	0.0732333	0.303736	0.201855
2019-09-20	1900-01-02 05:22:26	0.181617	0.358822	0.141236	0.869169	0.473602	0.12675	0.134994	0.676346
2019-09-20	1900-01-02 05:42:26	0.168456	0.162324	0.200989	0.90062	1.22276	0.332367	0.461228	0.744505
2019-09-20	1900-01-02 06:02:26	0.321119	0.358822	0.0896304	0.566104	1.49544	0.2366	0.362795	0.933253
2019-09-20	1900-01-02 06:22:26	0.213202	-0.185106	0.233582	0.809128	0.892669	0.19435	0.118119	0.267393
2019-09-20	1900-01-02 06:42:26	0.176352	0.116759	0.287904	0.603272	0.72332	0.0985833	0.807149	0.193991
2019-09-20	1900-01-02 07:02:26	0.307959	0.336039	0.54593	0.626145	1.07924	0.478833	0.399356	0.959468
2019-09-20	1900-01-02 07:22:26	0.479047	0.19365	0.124939	0.7062	1.73367	0.737967	0.343109	0.020972
2019-09-20	1900-01-02 07:42:26	0.647503	0.054108	0.24173	1.10076	1.08785	0.58305	0.331859	0.744505
2019-09-20	1900-01-02 08:02:26	0.329016	-0.0512602	0.279755	1.16366	1.38636	0.9633	0.0590597	0.450897
2019-09-20	1900-01-02 08:22:26	0.529057	0.0911293	0.374818	0.751946	2.15274	0.892883	0.880271	0.618673
2019-09-20	1900-01-02 08:42:26	0.54485	0.207889	0.0488893	0.906338	1.40646	0.957667	1.07714	0.589837
2019-09-20	1900-01-02 09:02:26	0.729099	0.224975	1.24668	0.403134	2.2245	1.61958	0.531537	0.519056
2019-09-20	1900-01-02 09:22:26	0.486943	0.86288	0.668154	0.940647	1.58729	1.4534	1.10807	1.14035
2019-09-20	1900-01-02 09:42:26	0.818591	0.327496	0.274323	0.60899	1.49257	1.17455	1.26275	1.15346
2019-09-20	1900-01-02 10:02:26	0.823856	0.0113912	1.01309	1.01498	2.12403	1.09287	0.492164	0.990926
2019-09-20	1900-01-02 10:22:26	0.921244	0.119607	0.548646	1.2723	2.28764	1.65057	0.717153	0.867715
2019-09-20	1900-01-02 10:42:26	1.11076	0.125303	0.526918	0.754805	2.13265	2.00828	0.815586	0.812664
2019-09-20	1900-01-02 11:02:26	1.05285	0.276236	0.9126	1.25229	1.95469	0.729517	1.50743	1.17443
2019-09-20	1900-01-02 11:22:26	1.3029	0.327496	0.890871	1.11219	2.10681	0.53235	0.714341	1.4025
2019-09-20	1900-01-02 11:42:26	0.889659	0.512602	1.00495	1.06359	1.80543	0.602767	0.565286	0.872958
2019-09-20	1900-01-02 12:02:26	0.82912	0.469885	1.83878	0.774819	1.64469	1.12948	0.756527	0.435168
2019-09-20	1900-01-02 12:22:26	0.881762	0.666383	0.841982	1.01498	2.04941	1.01118	0.908394	1.05908
2019-09-20	1900-01-02 12:42:26	1.19235	0.643601	0.611116	1.01498	2.35653	1.03935	1.5693	1.20327
2019-09-20	1900-01-02 13:02:26	1.07128	1.12203	0.673586	0.877747	1.45238	1.73225	1.44274	0.723533
2019-09-20	1900-01-02 13:22:26	0.910716	0.444255	0.812105	0.952083	1.32322	0.991467	1.51587	1.19278
2019-09-20	1900-01-02 13:42:26	0.950198	0.563862	0.31778	1.25229	2.00635	1.9266	1.42587	1.52833
2019-09-20	1900-01-02 14:02:26	1.27658	0.743273	1.06198	1.52676	1.46386	1.83365	1.07714	1.23997
2019-09-20	1900-01-02 14:22:26	1.10813	1.1619	0.871859	1.78408	1.6533	1.9266	1.364	1.05122
2019-09-20	1900-01-02 14:42:26	0.889659	0.700556	0.342225	1.24371	2.72967	1.56888	1.39493	1.32386
2019-09-20	1900-01-02 15:02:26	0.460622	0.0996727	0.263459	1.20654	1.91163	0.664733	1.5693	1.35269
2019-09-20	1900-01-02 15:22:26	0.644871	0.128151	0.401979	1.27802	2.20153	1.5548	1.82241	1.28715
2019-09-20	1900-01-02 15:42:26	0.66856	0.61797	0.46988	1.73262	2.58042	1.00555	1.85054	0.705182
2019-09-20	1900-01-01 16:02:26	0.831752	0.307561	0.844698	1.34092	1.3347	1.45622	1.16994	0.702561

## Sheet: Glucose oxidation-LBM
	Groups:	Group 1:	1
Computer	ID#:	310	306	307	798	308	309	312	NT
Date/Clock	BW (g) in:	25.9	27.3	25.4	23	20.5	22.2	20.9	20.6
Time	LBM(g)out:	17.4	18.1	16.8	14.6	12.6	13.8	13.1	12.7
2019-09-15	17:02:26	1.47329	1.36045	1.20865	1.1743	2.93316	1.98452	-0.163433	-0.112212
2019-09-15	17:22:26	2.4043	2.3882	1.98572	1.39817	1.74726	1.29618	0.0867507	-0.100392
2019-09-15	17:42:26	1.01382	2.02828	1.33685	0.356103	2.56766	0.932033	-0.466869	1.28452
2019-09-15	18:02:26	1.2951	0.716952	0.31148	1.01317	2.1472	0.0968333	-0.184401	-0.457273
2019-09-15	18:22:26	0.434239	0.600109	2.24134	2.37973	4.07969	-0.0510833	1.47596	-0.513891
2019-09-15	18:42:26	0.544118	1.06421	2.72986	1.99371	1.82607	0.838683	1.66407	-0.421782
2019-09-15	19:02:26	1.19408	1.30643	1.1065	1.92171	3.20086	0.539567	2.3311	1.18464
2019-09-15	19:22:26	1.39668	0.764404	3.20823	2.15924	5.47213	0.660617	3.2706	0.204585
2019-09-15	19:42:26	2.24042	1.35895	2.52551	1.21431	4.83703	1.50702	3.11247	1.16232
2019-09-15	20:02:26	3.07934	1.3072	2.42788	1.21884	4.10299	1.94998	3.90205	1.56223
2019-09-15	20:22:26	2.41246	1.3652	3.3381	0.966667	2.7889	2.26998	3.89318	2.67023
2019-09-15	20:42:26	3.53389	1.73714	2.77642	2.26584	4.36528	1.75558	3.58999	2.87622
2019-09-15	21:02:26	3.40008	1.42556	1.24065	1.00493	5.03221	2.37825	4.27558	3.52143
2019-09-15	21:22:26	3.97812	0.797516	1.84163	1.3891	3.4998	1.71565	4.89808	1.96525
2019-09-15	21:42:26	4.831	2.42001	2.84717	2.48741	5.65604	2.48595	3.17015	2.14558
2019-09-15	22:02:26	4.97344	1.50871	1.57756	2.27445	5.43619	1.82867	6.28704	3.09482
2019-09-15	22:22:26	5.05656	1.58275	3.59814	0.837178	4.00543	3.66723	6.57729	4.01278
2019-09-15	22:42:26	3.75899	1.67224	3.67689	3.49551	3.96846	4.75735	5.17449	4.67366
2019-09-15	23:02:26	4.31487	1.50722	3.04237	2.51304	4.84296	4.51552	6.45372	4.45989
2019-09-15	23:22:26	5.343	0.825825	3.05798	3.42362	3.99375	3.00195	5.90805	2.79962
2019-09-15	23:42:26	5.19312	0.429764	3.13648	2.77112	6.80491	5.22497	4.43685	4.66921
2019-09-16	1900-01-01 00:02:26	3.6928	0.855095	1.56701	2.12212	4.42457	6.32682	5.20274	6.15721
2019-09-16	1900-01-01 00:22:26	5.09091	1.80703	1.87264	2.53984	3.61227	5.40445	5.00982	5.61193
2019-09-16	1900-01-01 00:42:26	5.7865	1.57208	2.5537	1.68293	5.09035	3.1659	4.19926	5.01945
2019-09-16	1900-01-01 01:02:26	5.62412	1.3006	1.84487	3.11975	4.90632	7.20288	5.05777	4.74143
2019-09-16	1900-01-01 01:22:26	4.93922	2.04003	2.22686	1.91185	5.46702	6.68123	2.74447	3.4249
2019-09-16	1900-01-01 01:42:26	6.0034	2.68413	0.952779	2.5375	3.34338	4.38112	2.38302	3.42631
2019-09-16	1900-01-01 02:02:26	4.16678	1.03425	1.79216	3.95071	5.67638	4.69995	5.7142	3.65423
2019-09-16	1900-01-01 02:22:26	3.90003	1.38382	2.45327	2.81539	4.15992	3.85717	7.46673	5.31745
2019-09-16	1900-01-01 02:42:26	5.71182	0.704247	1.73522	4.35019	7.57168	4.67663	6.63204	6.71911
2019-09-16	1900-01-01 03:02:26	4.66698	0.0714138	2.07429	3.17977	4.3101	6.69687	4.77418	5.63201
2019-09-16	1900-01-01 03:22:26	4.50091	0.678077	0.906477	2.70132	4.46949	7.56127	7.15979	5.68297
2019-09-16	1900-01-01 03:42:26	5.91454	1.61246	3.86634	2.88953	4.41051	7.29745	5.6112	4.85738
2019-09-16	1900-01-01 04:02:26	6.23359	1.61043	3.1418	2.79135	6.68072	5.52775	5.23797	4.33412
2019-09-16	1900-01-01 04:22:26	4.72649	2.01253	4.55302	4.38911	5.75106	4.8432	4.95186	2.98661
2019-09-16	1900-01-01 04:42:26	3.81414	3.80723	4.91821	4.22399	4.49127	4.53173	7.92127	3.62299
2019-09-16	1900-01-01 05:02:26	3.85016	3.82704	3.82474	3.3986	4.24102	6.0355	7.27531	6.9199
2019-09-16	1900-01-01 05:22:26	6.28734	2.46325	3.00912	4.15236	5.0932	7.39147	4.03739	3.65153
2019-09-16	1900-01-01 05:42:26	6.03846	1.84014	3.70832	6.94075	3.71451	3.78437	7.74972	3.82718
2019-09-16	1900-01-01 06:02:26	3.47558	2.31995	4.29691	4.00216	2.67846	4.93652	4.37251	3.03264
2019-09-16	1900-01-01 06:22:26	5.5911	3.73829	3.63833	5.29544	3.43242	5.1081	4.65225	4.04492
2019-09-16	1900-01-01 06:42:26	3.77014	2.77326	2.32835	3.71099	2.80902	3.99893	4.7408	4.40082
2019-09-16	1900-01-01 07:02:26	3.23217	1.66459	2.2217	2.89871	6.17431	3.97782	7.82227	3.31866
2019-09-16	1900-01-01 07:22:26	5.06047	1.70444	1.39711	4.27924	5.1511	3.28478	4.82552	6.09535
2019-09-16	1900-01-01 07:42:26	4.36972	3.74528	3.09557	3.6659	5.59258	5.5876	4.44181	3.05673
2019-09-16	1900-01-01 08:02:26	2.69224	4.44955	3.80706	3.21975	2.73764	4.60778	3.7836	3.39032
2019-09-16	1900-01-01 08:22:26	3.25742	2.8259	1.8724	3.78162	2.33168	4.43647	7.93207	3.23552
2019-09-16	1900-01-01 08:42:26	3.27764	2.68515	1.62731	5.84035	4.70756	3.6195	5.20261	3.5115
2019-09-16	1900-01-01 09:02:26	2.57001	2.39599	3.29787	3.52851	5.54187	2.97793	3.8377	6.13546
2019-09-16	1900-01-01 09:22:26	3.5007	2.86629	3.77618	5.03269	3.43424	4.94578	3.61106	4.48203
2019-09-16	1900-01-01 09:42:26	3.33657	5.19272	2.28833	4.16743	4.64601	5.28008	4.26263	4.9971
2019-09-16	1900-01-01 10:02:26	3.74692	4.08887	2.159	2.798	5.25377	3.8305	6.44974	2.88504
2019-09-16	1900-01-01 10:22:26	2.2417	3.99494	2.86179	3.41195	3.5507	3.6395	4.49321	4.27006
2019-09-16	1900-01-01 10:42:26	1.66339	2.64807	3.16993	2.97124	3.13145	3.81143	3.85702	2.20215
2019-09-16	1900-01-01 11:02:26	1.81579	2.75284	2.63629	1.85003	5.59192	3.13685	3.56458	2.49487
2019-09-16	1900-01-01 11:22:26	1.75553	2.44248	2.77059	2.49942	3.01743	3.13952	3.73622	2.20286
2019-09-16	1900-01-01 11:42:26	2.74651	2.44418	2.36046	3.59327	3.36739	3.17548	6.22771	4.74357
2019-09-16	1900-01-01 12:02:26	2.91931	3.75292	4.5153	2.26732	5.25467	3.45337	4.1422	5.65443
2019-09-16	1900-01-01 12:22:26	4.3215	1.28255	1.89262	2.69697	5.87168	4.87013	3.4019	2.20406
2019-09-16	1900-01-01 12:42:26	5.0176	1.90729	2.54782	3.15361	2.54764	2.30547	2.86996	2.80682
2019-09-16	1900-01-01 13:02:26	3.31889	1.607	1.64314	2.89251	3.8619	2.6675	3.26233	1.99254
2019-09-16	1900-01-01 13:22:26	3.0733	1.6197	3.71565	3.08314	3.16966	1.47852	4.13271	2.02325
2019-09-16	1900-01-01 13:42:26	3.05741	3.09373	3.4362	3.25236	2.69263	1.21568	3.75992	3.27597
2019-09-16	1900-01-01 14:02:26	2.49203	2.69578	2.77329	2.10195	5.60469	2.27838	2.74435	1.78865
2019-09-16	1900-01-01 14:22:26	4.23522	2.00948	2.6582	1.62839	3.47832	3.51212	3.04098	3.76889
2019-09-16	1900-01-01 14:42:26	3.4914	2.17003	2.44114	2.25721	4.2112	3.65193	3.83673	4.80075
2019-09-16	1900-01-01 15:02:26	3.32073	1.92544	3.23552	2.14988	4.20716	4.0954	3.71331	2.89461
2019-09-16	1900-01-01 15:22:26	3.42307	2.54667	2.4544	3.75134	3.61815	2.8591	2.88369	2.0996
2019-09-16	1900-01-01 15:42:26	5.23619	1.42614	3.15577	2.67073	3.78666	2.77632	4.27173	4.20497
2019-09-16	1900-01-01 16:02:26	4.1411	1.88761	2.53379	2.70825	4.95726	4.03722	3.25169	6.32539
2019-09-16	1900-01-01 16:22:26	3.81261	3.50438	3.31854	3.02913	5.47708	3.67653	2.6279	4.12231
2019-09-16	1900-01-01 16:42:26	4.20712	3.41287	3.60914	2.82913	4.76011	3.34728	5.04369	4.5536
2019-09-16	1900-01-01 17:02:26	4.4428	2.59424	2.30845	2.03112	3.8822	2.25827	1.86518	7.50291
2019-09-16	1900-01-01 17:22:26	5.11547	1.40425	4.22441	2.6823	5.7326	2.20723	2.41845	3.62567
2019-09-16	1900-01-01 17:42:26	4.17357	2.79142	2.96838	2.58555	4.23268	1.95227	6.24625	3.19984
2019-09-16	1900-01-01 18:02:26	3.73547	2.56955	2.04875	4.34087	7.64293	1.54365	8.21138	6.16297
2019-09-16	1900-01-01 18:22:26	5.56344	4.07637	4.89688	5.25841	5.54999	4.86563	5.5797	4.067
2019-09-16	1900-01-01 18:42:26	5.94275	2.12356	3.88045	3.30733	6.53787	4.35038	4.55588	4.09453
2019-09-16	1900-01-01 19:02:26	4.46114	1.04455	4.22524	3.33384	5.61364	4.46243	7.54005	6.46241
2019-09-16	1900-01-01 19:22:26	6.12796	2.432	3.4442	4.1162	7.91163	4.30963	6.15652	7.48352
2019-09-16	1900-01-01 19:42:26	6.46333	4.80827	6.4935	2.82739	5.67559	6.45348	6.65329	6.35654
2019-09-16	1900-01-01 20:02:26	6.70192	4.60993	3.73471	5.88687	8.09418	5.18693	7.20958	4.89714
2019-09-16	1900-01-01 20:22:26	6.11409	2.55307	5.86551	4.36057	5.22527	4.66433	5.80807	6.06081
2019-09-16	1900-01-01 20:42:26	6.59499	3.86637	3.8349	4.16249	8.00598	7.28117	4.38485	4.58945
2019-09-16	1900-01-01 21:02:26	7.17538	5.68181	3.11379	3.34856	5.57251	5.6959	7.8454	5.54659
2019-09-16	1900-01-01 21:22:26	4.72644	3.88063	6.03124	4.30169	6.25002	4.3663	8.27042	4.83709
2019-09-16	1900-01-01 21:42:26	5.99173	3.17832	3.82907	3.97782	6.53721	6.9194	7.84321	6.07826
2019-09-16	1900-01-01 22:02:26	4.76926	3.24114	3.29707	2.37046	7.31776	7.3416	7.8834	4.79431
2019-09-16	1900-01-01 22:22:26	4.55872	3.66639	5.82056	4.54231	5.42074	6.19358	8.66728	7.80069
2019-09-16	1900-01-01 22:42:26	6.71189	5.23668	6.68289	4.17968	6.60603	5.24788	8.23929	5.44497
2019-09-16	1900-01-01 23:02:26	5.48188	3.13857	6.10579	3.66628	8.52231	8.1291	8.11626	4.78546
2019-09-16	1900-01-01 23:22:26	7.3665	4.64744	5.97492	3.74653	5.50697	5.86715	6.07028	5.08443
2019-09-16	1900-01-01 23:42:26	6.59189	5.01509	3.13394	3.2158	5.06884	5.99043	4.40055	7.9781
2019-09-17	1900-01-02 00:02:26	5.80462	4.50428	3.22856	5.3148	7.61499	7.4404	5.71864	8.31917
2019-09-17	1900-01-02 00:22:26	4.10425	5.6503	5.07558	5.34667	7.72192	6.04635	9.2449	6.28267
2019-09-17	1900-01-02 00:42:26	3.67791	4.51917	3.78047	3.96372	4.71442	6.34153	5.21025	4.8303
2019-09-17	1900-01-02 01:02:26	3.86645	4.0271	3.03409	2.92213	5.09677	7.8074	5.27909	5.93327
2019-09-17	1900-01-02 01:22:26	6.2648	2.92274	5.05368	5.29192	5.34665	8.43897	5.39325	7.16948
2019-09-17	1900-01-02 01:42:26	6.43555	2.0483	2.57067	5.00148	8.30205	7.39905	4.74889	4.6859
2019-09-17	1900-01-02 02:02:26	6.76972	1.49575	4.74109	3.60662	8.38231	5.28505	4.45284	4.69691
2019-09-17	1900-01-02 02:22:26	4.5204	2.1415	5.53379	5.81441	5.39008	5.42745	8.05763	4.62813
2019-09-17	1900-01-02 02:42:26	6.49235	5.11888	2.81396	3.87513	8.1331	5.03935	7.93716	7.15122
2019-09-17	1900-01-02 03:02:26	5.37183	4.81986	4.78175	3.48965	5.68214	7.60308	6.65502	4.08462
2019-09-17	1900-01-02 03:22:26	3.86029	2.43156	4.25861	4.14781	4.47454	8.14682	7.42721	6.91791
2019-09-17	1900-01-02 03:42:26	6.33324	3.85606	3.20676	3.53276	4.33917	7.60863	6.42597	7.72102
2019-09-17	1900-01-02 04:02:26	5.56087	3.87773	5.28306	3.56144	5.07912	8.05658	5.80251	4.43453
2019-09-17	1900-01-02 04:22:26	5.28612	2.27833	5.17715	2.79433	7.09928	8.56135	4.88839	2.85495
2019-09-17	1900-01-02 04:42:26	5.80348	4.36251	3.80411	3.73564	7.13668	6.28247	4.5028	4.28379
2019-09-17	1900-01-02 05:02:26	3.81143	1.94792	2.69851	3.50772	4.2414	4.43012	8.13353	5.18136
2019-09-17	1900-01-02 05:22:26	3.78986	2.36906	5.61716	4.84068	4.66715	5.09855	7.70866	3.46177
2019-09-17	1900-01-02 05:42:26	6.06486	3.57689	5.37141	4.09991	3.29827	4.02138	4.89841	4.86979
2019-09-17	1900-01-01 06:02:26	5.77594	1.74083	5.22194	3.4207	4.30644	4.04408	6.96625	4.31337
2019-09-17	1900-01-01 06:22:26	3.29539	2.07774	3.10889	2.91382	4.78463	3.21782	4.32414	3.91444
2019-09-17	1900-01-01 06:42:26	3.32575	0.802554	3.62968	4.75849	3.4765	5.80903	4.57154	4.06413
2019-09-17	1900-01-01 07:02:26	2.89221	1.052	3.36185	2.25169	3.82873	3.42533	4.10828	2.30448
2019-09-17	1900-01-01 07:22:26	2.38726	1.18832	4.7282	1.99537	2.3346	3.63998	6.71167	2.19733
2019-09-17	1900-01-01 07:42:26	3.12327	4.13937	2.54986	3.46705	3.34487	5.96935	7.26649	1.95149
2019-09-17	1900-01-01 08:02:26	2.52095	3.00398	4.65038	1.71597	3.37271	3.0738	5.32223	6.12087
2019-09-17	1900-01-01 08:22:26	4.00167	2.39922	2.96981	4.1128	6.56895	2.84998	3.74334	3.5666
2019-09-17	1900-01-01 08:42:26	4.62479	2.4657	3.02334	2.87513	4.02437	4.80907	6.26735	2.81224
2019-09-17	1900-01-01 09:02:26	2.95195	2.26145	2.99594	2.32227	2.207	2.27263	5.30808	3.05313
2019-09-17	1900-01-01 09:22:26	5.34476	3.87886	2.32889	4.52775	2.61267	2.93422	3.49233	4.75941
2019-09-17	1900-01-01 09:42:26	2.90528	2.73324	5.20701	2.47536	3.29203	4.19005	3.02953	2.61054
2019-09-17	1900-01-01 10:02:26	2.44497	3.98532	3.32111	3.94154	3.96822	4.49307	2.22249	2.33946
2019-09-17	1900-01-01 10:22:26	2.23661	4.13659	3.79654	1.39722	3.62716	3.33163	2.17627	4.41821
2019-09-17	1900-01-01 10:42:26	1.49854	2.63678	3.12687	1.88534	2.22867	5.10218	2.27614	4.25461
2019-09-17	1900-01-01 11:02:26	0.897244	3.09563	2.82785	2.84214	4.84287	6.98455	4.59224	4.87618
2019-09-17	1900-01-01 11:22:26	2.72087	3.83554	2.29468	2.09512	5.4461	3.44135	7.53093	3.72201
2019-09-17	1900-01-01 11:42:26	2.58188	2.63705	2.11352	1.76823	2.77949	3.84118	6.53972	3.68747
2019-09-17	1900-01-01 12:02:26	2.01305	2.87369	4.70936	1.54586	5.80804	3.82645	4.44312	3.04264
2019-09-17	1900-01-01 12:22:26	2.11671	2.29581	3.22012	2.11278	4.84932	2.76275	4.29032	5.10491
2019-09-17	1900-01-01 12:42:26	1.22961	2.34483	3.14433	2.89075	3.53141	1.97167	3.66395	4.47807
2019-09-17	1900-01-01 13:02:26	1.38199	4.08715	5.15414	2.59881	3.42181	2.8964	2.69104	3.6118
2019-09-17	1900-01-01 13:22:26	1.95447	2.32243	2.95973	2.11051	2.86536	4.24543	4.98686	4.03636
2019-09-17	1900-01-01 13:42:26	4.08344	2.09275	2.05621	2.44765	3.23531	3.20733	7.64258	2.43812
2019-09-17	1900-01-01 14:02:26	3.34149	2.64937	1.85485	0.815692	2.5262	2.45482	5.01916	2.97092
2019-09-17	1900-01-01 14:22:26	2.82846	1.33383	2.48001	2.35278	4.23441	1.7305	4.51252	2.71947
2019-09-17	1900-01-01 14:42:26	4.71643	1.9517	2.25469	3.24253	3.22817	1.52662	3.60371	3.89016
2019-09-17	1900-01-01 15:02:26	2.74328	1.47932	3.48875	1.51406	4.36703	2.45147	2.85166	3.27642
2019-09-17	1900-01-01 15:22:26	2.31362	2.76059	2.30617	3.47367	4.15537	5.53295	3.58855	6.10135
2019-09-17	1900-01-01 15:42:26	3.98769	4.88748	2.13753	3.3157	2.85401	4.28835	2.44528	4.81989
2019-09-17	1900-01-01 16:02:26	4.3427	2.00983	2.73983	2.77719	2.83693	4.08822	2.61806	3.67914
2019-09-17	1900-01-01 16:22:26	5.08997	2.29667	4.2614	1.29464	1.44868	3.49457	6.86474	4.06243
2019-09-17	1900-01-01 16:42:26	4.32605	2.93233	3.06014	1.28707	2.69083	4.71523	4.21015	5.63136
2019-09-17	1900-01-01 17:02:26	3.34981	4.16382	2.57403	1.66168	2.86057	6.07903	6.43972	4.17673
2019-09-17	1900-01-01 17:22:26	3.0231	2.74497	3.24934	1.99403	6.78253	5.3101	5.11646	6.77292
2019-09-17	1900-01-01 17:42:26	4.07034	4.88195	3.71869	0.296502	3.08578	4.49742	7.02115	4.10761
2019-09-17	1900-01-01 18:02:26	2.45219	3.74879	3.27131	1.97859	3.42524	3.90295	5.58739	5.92269
2019-09-17	1900-01-01 18:22:26	3.27765	2.77065	4.57533	2.09837	5.986	5.80392	7.25665	3.57898
2019-09-17	1900-01-01 18:42:26	5.05075	4.66744	6.52826	3.88264	5.77943	4.49823	6.77477	6.42414
2019-09-17	1900-01-01 19:02:26	5.30662	3.60212	4.06819	5.22485	5.33101	4.79918	7.68527	5.05521
2019-09-17	1900-01-01 19:22:26	5.76213	5.9094	6.42929	3.45025	7.2706	4.74663	8.16788	7.56102
2019-09-17	1900-01-01 19:42:26	5.93124	3.42234	5.9769	4.17711	5.75711	8.40752	6.12339	6.01591
2019-09-17	1900-01-01 20:02:26	5.18773	3.70799	4.77153	4.65196	7.57501	7.60517	5.85736	6.50753
2019-09-17	1900-01-01 20:22:26	6.23193	5.71582	3.91079	5.06685	8.59147	6.23973	8.39084	7.80097
2019-09-17	1900-01-01 20:42:26	4.07378	4.43639	6.68832	4.90317	5.66188	4.75663	7.8401	5.73782
2019-09-17	1900-01-01 21:02:26	6.66864	4.07369	5.30738	3.4636	5.29214	8.0854	6.77877	7.41826
2019-09-17	1900-01-01 21:22:26	5.62585	3.99339	5.95702	5.21124	6.8871	5.35142	6.17211	5.02499
2019-09-17	1900-01-01 21:42:26	6.14067	4.4579	3.40356	5.44777	5.10424	7.49343	8.83662	6.24515
2019-09-17	1900-01-01 22:02:26	4.65042	3.93622	5.39481	3.81696	7.72236	5.8113	9.33612	4.71592
2019-09-17	1900-01-01 22:22:26	5.21362	3.32174	6.81051	3.85251	7.51663	8.86873	5.67627	5.54166
2019-09-17	1900-01-01 22:42:26	4.96576	3.23121	4.09191	6.70554	5.21985	7.31228	8.99951	8.90566
2019-09-17	1900-01-01 23:02:26	7.03189	5.99286	4.78565	5.57254	5.10579	9.04967	7.17034	5.39602
2019-09-17	1900-01-01 23:22:26	5.66561	5.09389	3.94666	7.3457	5.81063	6.52212	9.69093	6.40435
2019-09-17	1900-01-01 23:42:26	6.3687	5.3097	5.61676	4.98268	7.80076	5.67103	7.43651	8.50539
2019-09-18	1900-01-02 00:02:26	7.01063	3.68752	5.45819	2.67887	8.18401	5.52725	7.08811	5.81569
2019-09-18	1900-01-02 00:22:26	6.54238	4.33501	4.94103	5.79963	5.39487	5.50252	5.22177	7.10559
2019-09-18	1900-01-02 00:42:26	4.79876	3.13245	2.84633	3.74883	5.28504	7.67375	7.82489	8.61666
2019-09-18	1900-01-02 01:02:26	4.84332	5.49494	5.65229	2.09913	5.19113	7.73638	6.53334	4.19202
2019-09-18	1900-01-02 01:22:26	3.33204	6.22126	5.70484	3.38228	7.86746	8.2342	7.44595	4.28844
2019-09-18	1900-01-02 01:42:26	6.73552	4.94791	6.66979	4.4055	5.64048	9.21478	7.90163	6.09664
2019-09-18	1900-01-02 02:02:26	4.87931	2.93464	4.26113	1.62927	4.62286	7.15868	5.64064	8.52735
2019-09-18	1900-01-02 02:22:26	4.36452	3.8203	4.3745	3.05622	7.94607	4.4966	9.02019	4.89663
2019-09-18	1900-01-02 02:42:26	4.30602	5.89794	6.19589	3.27563	7.91552	4.68285	5.55073	3.94993
2019-09-18	1900-01-02 03:02:26	6.44444	4.75138	3.96386	2.04433	8.00825	4.57983	7.1495	7.55068
2019-09-18	1900-01-02 03:22:26	5.54556	3.50398	5.91848	3.27749	5.66504	5.37418	5.73601	6.38579
2019-09-18	1900-01-02 03:42:26	5.39424	5.19939	4.93861	1.33984	3.88271	6.8713	4.87072	6.48966
2019-09-18	1900-01-02 04:02:26	5.56559	3.46214	3.27905	1.51331	4.07665	8.19367	4.10549	6.53992
2019-09-18	1900-01-02 04:22:26	7.1957	5.21451	4.70192	2.1972	7.39531	8.04402	5.24518	7.48577
2019-09-18	1900-01-02 04:42:26	6.47132	5.46361	5.28935	4.2586	7.80022	5.25418	8.9498	4.49486
2019-09-18	1900-01-02 05:02:26	6.08485	3.51978	3.31348	2.93438	5.32848	4.6269	6.18782	3.36242
2019-09-18	1900-01-02 05:22:26	4.15719	2.45616	3.59143	4.23556	4.1505	4.38275	7.30643	3.91692
2019-09-18	1900-01-02 05:42:26	3.5922	3.22016	4.94818	1.81682	2.93805	3.54435	4.30542	4.50568
2019-09-18	1900-01-02 06:02:26	5.5248	2.57929	6.12371	3.23032	4.99789	2.98188	3.98885	6.21903
2019-09-18	1900-01-02 06:22:26	3.21604	4.59642	2.80673	5.07	7.66066	2.43138	3.00096	4.27625
2019-09-18	1900-01-02 06:42:26	3.14654	4.71788	4.41669	2.95151	5.03296	5.69325	1.80725	3.01371
2019-09-18	1900-01-02 07:02:26	2.99628	2.9001	4.37731	2.72054	4.03777	7.14772	1.80747	3.5574
2019-09-18	1900-01-02 07:22:26	2.83653	2.54139	4.25983	1.66855	3.55524	3.50993	4.52518	5.04266
2019-09-18	1900-01-02 07:42:26	2.1414	2.3228	5.20742	3.94505	2.71186	3.83252	6.54602	5.6035
2019-09-18	1900-01-02 08:02:26	4.83922	2.65818	3.20384	4.7606	2.40076	4.4879	4.92782	4.07038
2019-09-18	1900-01-02 08:22:26	2.86916	3.79251	2.81518	2.99824	3.5756	2.85512	4.79082	4.0242
2019-09-18	1900-01-02 08:42:26	3.34493	4.71552	2.40491	3.24597	2.716	2.1062	3.20583	5.36231
2019-09-18	1900-01-02 09:02:26	2.19818	2.63168	4.04253	3.83177	1.02491	1.48723	5.35172	2.85951
2019-09-18	1900-01-02 09:22:26	3.16852	2.17913	3.21009	1.62012	0.532945	1.91578	5.16737	3.68164
2019-09-18	1900-01-02 09:42:26	4.41123	3.29924	2.18817	2.89624	2.07047	2.99245	3.56388	4.17897
2019-09-18	1900-01-02 10:02:26	4.42781	3.42731	1.72495	1.94629	0.709138	3.55415	2.81569	3.83084
2019-09-18	1900-01-02 10:22:26	2.44249	2.71974	2.28396	2.69189	3.12644	1.20247	2.11397	1.15203
2019-09-18	1900-01-02 10:42:26	3.33897	2.52496	2.10616	2.27045	1.98427	2.74683	3.67819	3.02809
2019-09-18	1900-01-02 11:02:26	1.50016	2.41427	1.97523	1.11786	1.63279	3.03558	4.05019	1.89156
2019-09-18	1900-01-02 11:22:26	1.36324	1.75062	1.79084	1.84616	1.11509	1.41818	1.66099	2.94408
2019-09-18	1900-01-02 11:42:26	1.26577	1.76694	1.93699	1.88657	0.855134	3.19837	1.36683	1.16805
2019-09-18	1900-01-02 12:02:26	2.74487	2.47673	2.34726	1.73067	3.12907	4.23248	3.19458	4.1036
2019-09-18	1900-01-02 12:22:26	1.46362	1.45618	2.94218	1.32336	2.60841	3.08922	0.552389	1.21385
2019-09-18	1900-01-02 12:42:26	1.69848	2.18134	2.52882	1.04085	1.76711	2.5636	1.11919	0.914825
2019-09-18	1900-01-02 13:02:26	1.97297	1.1987	2.07734	1.37593	1.09362	2.73538	0.709282	4.1122
2019-09-18	1900-01-02 13:22:26	1.5492	1.64737	1.51669	3.08261	0.663587	1.45652	0.953093	1.19795
2019-09-18	1900-01-02 13:42:26	2.65518	0.650813	1.76556	2.112	1.89745	3.23862	2.39818	0.628011
2019-09-18	1900-01-02 14:02:26	2.32412	1.28735	0.70478	2.02476	3.71022	3.69092	4.57176	3.75301
2019-09-18	1900-01-02 14:22:26	1.54043	0.790203	1.46068	1.84852	3.45024	3.15497	3.38622	1.5498
2019-09-18	1900-01-02 14:42:26	2.53475	1.09112	2.53864	0.945384	2.42591	2.4307	2.96828	2.44679
2019-09-18	1900-01-02 15:02:26	1.65958	0.62948	2.29625	1.49218	1.84845	2.62142	2.15978	3.02992
2019-09-18	1900-01-02 15:22:26	2.96247	1.93415	2.66639	1.59863	1.79262	5.1648	2.16855	2.93181
2019-09-18	1900-01-02 15:42:26	3.5266	1.14009	2.09385	2.6663	1.32211	3.14603	3.96376	2.56835
2019-09-18	1900-01-01 16:02:26	4.34905	2.22224	2.20492	2.67897	1.15754	2.6934	5.21712	4.2646
2019-09-18	1900-01-01 16:22:26	2.09589	0.882748	2.56948	3.19829	2.59998	2.19362	4.91775	5.37117
2019-09-18	1900-01-01 16:42:26	2.64907	1.45359	1.60496	1.5423	3.76214	3.83157	5.55572	1.8867
2019-09-18	1900-01-01 17:02:26	2.23774	1.49157	2.13758	2.91891	3.29	5.28488	5.3865	3.86145
2019-09-18	1900-01-01 17:22:26	1.80978	2.04894	1.69139	2.68298	3.09612	2.42835	1.63853	1.44403
2019-09-18	1900-01-01 17:42:26	2.12969	1.43712	2.59083	2.50512	4.23829	3.49422	0.940362	1.70538
2019-09-18	1900-01-01 18:02:26	3.28798	1.59662	2.12135	4.20937	5.07329	5.53133	2.06431	2.1797
2019-09-18	1900-01-01 18:22:26	4.79591	1.55323	3.43321	5.0085	3.83447	3.05657	6.53033	2.14651
2019-09-18	1900-01-01 18:42:26	2.77968	1.7298	2.6374	5.90108	4.42345	4.08193	5.0468	2.90442
2019-09-18	1900-01-01 19:02:26	4.74241	1.06703	4.20848	4.79018	5.30406	5.03662	4.94234	3.60175
2019-09-18	1900-01-01 19:22:26	5.56765	1.1057	4.60882	3.81102	6.7578	4.7525	3.79683	3.36107
2019-09-18	1900-01-01 19:42:26	4.68948	1.74337	4.59035	4.55676	4.37024	5.1033	7.18	6.62255
2019-09-18	1900-01-01 20:02:26	5.56344	1.59862	5.36418	5.86204	7.1218	6.02552	5.7302	7.09884
2019-09-18	1900-01-01 20:22:26	6.63586	1.62184	4.3137	6.50153	7.74731	5.27895	6.90637	5.78435
2019-09-18	1900-01-01 20:42:26	6.79079	2.19243	5.92187	3.63056	6.57282	5.50182	6.06165	7.96124
2019-09-18	1900-01-01 21:02:26	6.49219	1.06676	2.95476	5.68789	5.4498	6.00178	5.87239	7.83607
2019-09-18	1900-01-01 21:22:26	4.497	1.02696	3.5069	5.70712	7.28497	6.22372	6.29554	4.10149
2019-09-18	1900-01-01 21:42:26	4.31496	2.58965	5.70574	4.2068	8.28951	6.13772	5.02212	5.18706
2019-09-18	1900-01-01 22:02:26	6.22856	1.56854	4.30004	5.92314	8.06226	7.31317	9.35731	6.18886
2019-09-18	1900-01-01 22:22:26	6.0942	3.13356	5.71936	4.29785	4.89503	7.12163	6.52482	8.20083
2019-09-18	1900-01-01 22:42:26	5.82443	2.85748	3.75718	6.46844	4.92366	5.30358	5.45498	7.15783
2019-09-18	1900-01-01 23:02:26	6.90505	2.38783	3.26534	4.47762	6.52861	4.9725	8.00216	6.51349
2019-09-18	1900-01-01 23:22:26	6.85614	2.57329	5.82861	7.03074	6.38651	7.31193	7.97055	7.35362
2019-09-18	1900-01-01 23:42:26	4.42099	2.0575	6.04305	5.19231	7.58513	8.65535	5.5172	5.93421
2019-09-19	1900-01-02 00:02:26	6.28983	4.08253	3.62195	5.91027	8.04951	8.64778	4.49458	6.8484
2019-09-19	1900-01-02 00:22:26	4.91022	2.41708	3.78506	3.55431	4.9827	6.33698	4.51498	5.35099
2019-09-19	1900-01-02 00:42:26	4.10345	2.63397	3.71515	3.89438	4.87728	4.63552	7.82227	5.34106
2019-09-19	1900-01-02 01:02:26	5.10081	2.99839	5.83403	4.33651	5.97303	5.54337	9.61292	8.42859
2019-09-19	1900-01-02 01:22:26	6.45366	5.82656	5.97465	6.34736	5.13807	5.08308	6.97943	5.37267
2019-09-19	1900-01-02 01:42:26	6.42225	3.14325	6.30244	6.34665	7.10173	5.76373	7.30834	4.66104
2019-09-19	1900-01-02 02:02:26	4.97928	2.66806	3.64809	4.48346	7.68736	5.89385	7.67791	4.968
2019-09-19	1900-01-02 02:22:26	4.52174	2.80357	2.92717	3.69725	8.49622	7.99892	4.13235	4.72221
2019-09-19	1900-01-02 02:42:26	7.27316	5.10568	3.84888	5.61044	5.02382	7.89828	4.22359	6.95498
2019-09-19	1900-01-02 03:02:26	7.01426	2.54188	4.78609	4.1005	5.28746	5.74927	4.30884	5.10353
2019-09-19	1900-01-02 03:22:26	6.50096	1.86151	5.64159	6.02211	5.66927	5.04758	4.03704	6.70577
2019-09-19	1900-01-02 03:42:26	4.72422	2.88697	5.30251	5.54217	7.82917	6.50263	6.84517	6.4497
2019-09-19	1900-01-02 04:02:26	3.95545	4.2986	3.87243	3.08916	6.98153	6.85422	5.54657	5.77663
2019-09-19	1900-01-02 04:22:26	4.1352	3.67773	3.61967	5.25484	7.50226	6.2302	4.53154	5.01021
2019-09-19	1900-01-02 04:42:26	6.26988	3.66253	5.47587	3.88633	5.90684	7.92167	7.20853	4.42357
2019-09-19	1900-01-02 05:02:26	6.26065	5.49335	5.86662	5.37394	4.9239	7.64268	4.71163	7.49579
2019-09-19	1900-01-02 05:22:26	6.51173	5.85795	5.65971	5.90585	5.32602	6.81933	7.48675	5.61062
2019-09-19	1900-01-02 05:42:26	6.55421	3.56227	5.06936	3.12321	5.15869	5.09072	4.39408	3.83565
2019-09-19	1900-01-02 06:02:26	4.62891	3.06326	4.03108	5.61138	3.47882	5.9007	3.89401	7.41547
2019-09-19	1900-01-02 06:22:26	4.01388	2.71288	5.64694	2.39428	3.07571	4.37662	3.43806	5.74632
2019-09-19	1900-01-02 06:42:26	4.11984	2.48356	4.57268	3.09736	2.88394	4.63255	3.0929	7.73987
2019-09-19	1900-01-02 07:02:26	4.4442	4.59274	3.2351	5.48793	5.51113	3.9969	2.44024	5.21253
2019-09-19	1900-01-02 07:22:26	6.90287	2.41405	4.15739	6.15756	3.93001	3.47225	5.08767	5.63812
2019-09-19	1900-01-02 07:42:26	5.41477	2.81994	2.77269	3.05908	1.76776	5.00507	5.71283	5.68433
2019-09-19	1900-01-02 08:02:26	4.33801	2.66516	3.22663	3.35582	1.89205	3.75508	2.95041	2.94527
2019-09-19	1900-01-02 08:22:26	4.3614	2.68951	2.77677	2.74786	1.80945	3.03043	2.82217	3.40543
2019-09-19	1900-01-02 08:42:26	3.73298	2.03283	3.12469	2.09882	2.52897	2.7881	3.20558	5.97892
2019-09-19	1900-01-02 09:02:26	3.33838	2.57814	2.44781	2.48722	1.02319	2.9464	1.78692	4.39682
2019-09-19	1900-01-02 09:22:26	2.9116	1.75722	2.42982	4.67691	1.43861	2.30993	1.74588	3.44047
2019-09-19	1900-01-02 09:42:26	3.50426	1.8876	3.67229	4.32516	2.9329	2.87252	1.2567	5.65961
2019-09-19	1900-01-02 10:02:26	3.5977	3.35399	1.71366	4.62354	2.13083	3.25422	2.98693	3.41843
2019-09-19	1900-01-02 10:22:26	2.94002	2.2004	2.07121	2.43635	0.661719	3.92743	2.00966	4.38885
2019-09-19	1900-01-02 10:42:26	3.04507	2.04428	1.44577	1.87903	0.289834	2.2488	0.985094	1.25452
2019-09-19	1900-01-02 11:02:26	1.71434	1.16889	2.60536	1.73487	0.829692	1.78407	1.44393	2.7056
2019-09-19	1900-01-02 11:22:26	2.22194	1.76317	1.54805	0.949732	1.69389	4.13233	1.32967	1.7036
2019-09-19	1900-01-02 11:42:26	3.20074	2.4247	1.45381	2.78525	1.5999	3.48168	2.29419	1.52768
2019-09-19	1900-01-02 12:02:26	1.19729	2.3544	1.49672	0.6624	0.611106	2.40268	2.7252	1.43649
2019-09-19	1900-01-02 12:22:26	2.46057	1.04809	1.38412	0.495438	0.248274	2.921	1.99883	0.828331
2019-09-19	1900-01-02 12:42:26	1.13646	1.15954	1.69039	1.15352	2.29374	3.56047	2.04625	4.23592
2019-09-19	1900-01-02 13:02:26	0.630075	1.39808	3.95871	1.34395	3.0174	4.43403	2.43102	2.37622
2019-09-19	1900-01-02 13:22:26	1.12398	1.23348	3.055	1.24447	2.15396	4.81898	1.56085	1.6225
2019-09-19	1900-01-02 13:42:26	2.14989	0.506957	3.21972	0.736787	1.43531	3.2725	0.997641	1.73383
2019-09-19	1900-01-02 14:02:26	0.792628	1.49275	3.17811	3.30767	0.647112	1.15135	1	3.26482
2019-09-19	1900-01-02 14:22:26	0.647846	0.25829	3.20951	3.44238	2.9549	2.77573	2.21961	2.25832
2019-09-19	1900-01-02 14:42:26	0.766946	1.06678	3.21538	2.56723	5.02771	1.54717	3.20357	0.202615
2019-09-19	1900-01-02 15:02:26	1.75233	0.0465588	2.19102	1.78153	3.71013	0.7577	2.84983	1.85804
2019-09-19	1900-01-02 15:22:26	4.13753	0.777531	2.69978	1.72695	5.67253	1.43543	3.80408	1.58774
2019-09-19	1900-01-02 15:42:26	3.77861	0.711931	2.30333	2.52933	2.87144	2.9083	2.02975	1.13179
2019-09-19	1900-01-01 16:22:26	3.20406	1.50464	3.31942	2.45584	2.79268	3.48883	0.519605	2.41412
2019-09-19	1900-01-01 16:42:26	4.74258	2.76242	4.44507	2.7778	3.6846	4.23293	2.50632	2.24364
2019-09-19	1900-01-01 17:02:26	3.22752	3.14581	3.92776	4.5021	4.30918	6.24553	3.3762	3.83025
2019-09-19	1900-01-01 17:22:26	4.04362	3.53397	3.64694	3.2999	3.26347	4.13578	2.45956	2.23345
2019-09-19	1900-01-01 17:42:26	3.13214	3.05591	1.74017	4.24556	2.15824	4.00532	2.63054	1.86409
2019-09-19	1900-01-01 18:02:26	1.6661	2.80138	3.11987	3.62978	2.80199	1.76475	4.57296	1.84708
2019-09-19	1900-01-01 18:22:26	1.64002	3.20191	2.62178	5.75074	2.86937	3.97013	3.38356	2.72088
2019-09-19	1900-01-01 18:42:26	2.52435	2.15396	4.67283	5.60485	6.29826	3.8592	3.04875	3.00824
2019-09-19	1900-01-01 19:02:26	4.34531	2.08116	4.08912	7.04117	3.53149	2.91403	6.43554	1.78679
2019-09-19	1900-01-01 19:22:26	4.68945	2.7462	6.18646	6.89959	6.43957	3.49387	5.56414	5.75618
2019-09-19	1900-01-01 19:42:26	5.54295	1.27689	4.93595	4.6871	7.6381	4.44538	4.81953	3.52835
2019-09-19	1900-01-01 20:02:26	6.40264	2.22658	3.30631	4.22499	4.41864	5.67495	7.13188	6.4292
2019-09-19	1900-01-01 20:22:26	4.38304	3.02488	5.12323	5.74113	4.3949	7.22995	7.6002	4.96792
2019-09-19	1900-01-01 20:42:26	4.1176	2.56532	6.70526	6.9397	8.15649	5.94415	5.25194	5.93967
2019-09-19	1900-01-01 21:02:26	6.22504	3.64483	6.44108	5.6935	4.86884	5.7137	4.04219	6.15763
2019-09-19	1900-01-01 21:22:26	6.55963	2.17912	4.31677	5.9357	4.91279	7.39152	7.53533	5.09707
2019-09-19	1900-01-01 21:42:26	7.15185	3.27177	6.20762	4.46823	7.6024	8.29418	8.03343	5.56053
2019-09-19	1900-01-01 22:02:26	5.66865	3.17284	4.17568	6.92534	7.9664	5.78887	5.91336	8.08223
2019-09-19	1900-01-01 22:22:26	4.21365	2.95088	4.31121	5.86825	7.22102	5.76337	5.45097	5.52645
2019-09-19	1900-01-01 22:42:26	4.0477	4.2728	5.88312	4.37726	4.75764	8.85322	5.71616	6.06274
2019-09-19	1900-01-01 23:02:26	6.08107	4.84664	4.12546	4.35789	4.22071	8.25807	5.14796	5.0958
2019-09-19	1900-01-01 23:22:26	4.52093	3.60919	5.35044	3.72104	4.80238	5.69118	5.81679	8.5113
2019-09-19	1900-01-01 23:42:26	4.38409	3.57971	4.58468	6.59832	7.08459	8.29708	4.60616	6.4972
2019-09-20	1900-01-02 00:02:26	7.31898	3.13501	6.24701	7.20291	8.66797	9.74602	7.93533	9.33744
2019-09-20	1900-01-02 00:22:26	6.32009	3.82167	5.40174	3.78357	8.28547	6.28817	6.57997	8.25914
2019-09-20	1900-01-02 00:42:26	4.88663	3.63262	4.98478	6.12672	4.59455	5.9446	7.06009	9.03372
2019-09-20	1900-01-02 01:02:26	4.66885	2.99906	3.71758	3.56744	4.60649	7.1695	7.19725	5.41299
2019-09-20	1900-01-02 01:22:26	6.42342	3.82679	3.54422	5.33314	4.63161	9.31198	5.41445	5.80421
2019-09-20	1900-01-02 01:42:26	6.52049	5.57215	5.05966	4.83898	5.72115	8.08582	5.72431	8.60916
2019-09-20	1900-01-02 02:02:26	5.68164	5.28189	6.40283	5.67636	6.85967	6.4326	5.55825	5.1453
2019-09-20	1900-01-02 02:22:26	5.75623	3.50666	4.46098	3.86655	6.17359	6.77957	7.69254	7.2747
2019-09-20	1900-01-02 02:42:26	4.76167	2.90151	5.84778	2.95508	5.52653	5.00205	6.83605	7.6722
2019-09-20	1900-01-02 03:02:26	7.65916	3.35512	3.41679	3.22394	4.38782	7.30637	7.8043	5.00416
2019-09-20	1900-01-02 03:22:26	5.55932	3.07614	5.70428	3.0676	4.34663	7.70923	7.76398	4.82957
2019-09-20	1900-01-02 03:42:26	6.80394	5.17513	6.43159	3.64751	6.63762	9.56425	4.6416	7.44545
2019-09-20	1900-01-02 04:02:26	5.50822	3.2921	6.59359	5.93453	6.56484	7.47315	5.16241	4.52754
2019-09-20	1900-01-02 04:22:26	7.1724	6.13244	6.05414	4.87811	7.85888	5.49048	8.37866	4.04351
2019-09-20	1900-01-02 04:42:26	4.89456	3.8306	4.22523	3.78707	4.51667	3.90922	6.1891	6.95534
2019-09-20	1900-01-02 05:02:26	5.74391	4.26318	5.01183	3.18586	4.58976	4.90513	6.05797	5.80422
2019-09-20	1900-01-02 05:22:26	6.37515	5.44019	3.7034	6.10097	4.31341	7.17242	7.72735	4.03682
2019-09-20	1900-01-02 05:42:26	3.9585	6.34186	5.89783	6.18368	4.82291	4.92577	4.70444	3.92111
2019-09-20	1900-01-02 06:02:26	3.47054	3.50282	6.36263	4.25452	5.04824	4.75593	4.86804	5.2939
2019-09-20	1900-01-02 06:22:26	6.25635	3.84693	7.13414	3.65629	5.12379	4.29398	4.79157	5.6561
2019-09-20	1900-01-02 06:42:26	4.22307	3.36031	5.91261	5.41899	3.61765	3.89412	6.65231	4.82777
2019-09-20	1900-01-02 07:02:26	3.76284	2.31574	2.58536	3.52542	2.66885	5.57267	7.52759	4.90707
2019-09-20	1900-01-02 07:22:26	3.12905	2.67143	3.76255	2.93035	3.24332	3.02497	7.47454	7.45737
2019-09-20	1900-01-02 07:42:26	2.94066	2.9878	3.61901	2.87902	2.01287	2.96595	6.74678	5.44055
2019-09-20	1900-01-02 08:02:26	3.49928	4.88044	4.62312	4.71295	1.61076	4.37203	4.83309	4.74001
2019-09-20	1900-01-02 08:22:26	3.0606	3.59445	3.56278	5.08497	0.997206	2.48768	3.57129	4.08885
2019-09-20	1900-01-02 08:42:26	4.36611	2.55615	3.86052	4.137	1.77719	2.5805	3.77258	6.55096
2019-09-20	1900-01-02 09:02:26	3.71761	3.46509	4.57118	4.72015	2.34848	1.72412	4.03934	5.0504
2019-09-20	1900-01-02 09:22:26	3.74633	4.71164	2.944	3.62709	1.36557	2.11097	4.05686	3.4701
2019-09-20	1900-01-02 09:42:26	2.59071	5.23361	3.40166	4.9524	2.12468	4.26978	4.15816	3.49909
2019-09-20	1900-01-02 10:02:26	2.40952	3.56621	3.96667	2.63716	2.25373	1.83523	6.60988	4.18803
2019-09-20	1900-01-02 10:22:26	1.86233	3.05003	4.32026	2.07735	1.41303	1.216	3.9767	3.81449
2019-09-20	1900-01-02 10:42:26	1.64413	3.02786	2.30728	2.81025	1.63644	3.53392	4.21003	3.28574
2019-09-20	1900-01-02 11:02:26	1.44175	2.94487	3.43083	1.76876	1.12311	4.06398	1.99132	2.67538
2019-09-20	1900-01-02 11:22:26	2.60423	4.03913	1.43724	1.89596	0.399942	3.50282	5.8842	2.31432
2019-09-20	1900-01-02 11:42:26	3.19578	2.0528	1.44103	4.4304	0.859889	3.4062	5.85243	6.12001
2019-09-20	1900-01-02 12:02:26	2.03632	3.26119	3.21125	2.93976	0.461578	2.36378	3.40418	3.80561
2019-09-20	1900-01-02 12:22:26	1.87518	1.46761	2.75175	2.72331	1.09911	4.27382	3.86764	3.61503
2019-09-20	1900-01-02 12:42:26	1.36296	1.9921	2.77089	4.55957	2.5331	1.92635	2.29229	2.35421
2019-09-20	1900-01-02 13:02:26	2.02638	3.28379	2.54382	3.52515	3.31211	2.08945	2.40707	3.11105
2019-09-20	1900-01-02 13:22:26	1.6654	1.57377	5.05072	4.69112	2.14338	2.0804	1.89938	2.40335
2019-09-20	1900-01-02 13:42:26	2.00735	1.89838	3.10756	1.51259	2.14864	0.822433	4.20096	4.20852
2019-09-20	1900-01-02 14:02:26	1.21659	1.86031	3.97014	1.10588	1.59236	0.886183	2.96981	4.30653
2019-09-20	1900-01-02 14:22:26	3.26659	3.74725	4.97959	3.10323	1.21892	1.87433	2.07591	3.3931
2019-09-20	1900-01-02 14:42:26	2.82846	3.4345	5.70542	2.42444	0.618273	3.15655	2.29552	2.65793
2019-09-20	1900-01-02 15:02:26	3.49819	2.90298	3.77777	2.55669	0.866292	2.57757	1.76157	2.21828
2019-09-20	1900-01-02 15:22:26	2.93108	3.27757	3.29766	2.09136	0.448772	1.22707	1.47405	4.65285
2019-09-20	1900-01-02 15:42:26	4.01279	2.7772	3.46508	1.28826	1.99141	2.29692	1.45597	5.86699
2019-09-20	1900-01-01 16:02:26	1.68484	2.57565	2.28569	3.63285	2.9453	1.25915	5.4505	4.02621
