# Supplementary material for: tTARGIT AAVs mediate the sensitive and flexible manipulation of intersectional neuronal populations in mice
Source: eLife. 2021 Mar 11;10:e66835. doi: 10.7554/eLife.66835 (PMC8026215; doi:10.7554/eLife.66835)
Supplement: Figure 4—source data 1. [file elife-66835-fig4-data1.xlsx]

## Sheet: Lepr VMH Dq
				Day 0- control				Day 1-control				Day 2- start CNO					Day 3- CNO					Day 4- CNO					Day 5- end CNO					Day 6 Control				Day 7 Control
	ID	treatment		Body weight	Food weight	water weight		Body weight	Food weight	water weight		Body weight	Food weight	end water weight	new water weight		Body weight	Food weight	end water weight	new water weight		Body weight	Food weight	end water weight	new water weight		Body weight	Food weight	end water weight	new water weight		Body weight	Food weight	water weight		Body weight	Food weight	water weight
	308	CNO		22.56	60.02	75		22.45	55.9	69.96		22.53	49.67	64.19	50.7		20.59	44.34	45.52	48.61		20.51	42.75	43.4	50.46		20.5	40.6	43.2	67.9		21.7	36.9	59.84		22.45	32.97	53.18
	309	CNO		22.61	60.99	69.7		21.71	56.37	65.26		21.15	54.65	60.8	49.07		20.63	48.01	43.36	46.62		20.64	46.67	43.07	48.38		20.7	43.1	43.1	67.2		21.68	38.51	60.76		21.86	35.96	55.68
	307	CNO		22.22	46.23	71.4		21.93	37.23	66.56		22.17	29.31	61.26	48.36		19.87	25.6	45.11	48.18		20.24	20.23	45.35	47.49		20.5	16.8	41.3	64.7		21.69	12.86	58.56		22.19	8.5	lost
	NT	CNO		24.13	57.55	73.73		24	51.58	67.63		23.63	45.12	61.34	48.33		20.77	39.89	44.78	46.1		20.86	40.01	43.08	46.06		20.6	35.3	39.9	66.4		23.1	31.99	58.5		23.25	28.99	52.79
	317	CNO		23.69	55.04	71.13		23.88	45.6	64.42		23.77	39.3	57.01	48.32		21.81	39.3	44.12	46.58		22.13	36.54	41.58	47.65		22.7	34.1	39.7	65.9		23.86	32.19	57.24		23.93	29.3	49.94
	319	CNO		22.5	57.37	70.57		21.8	53.99	65.67		21.96	50.07	60.96	47.84		20.34	45.29	43.16	46.22		19.89	44.05	41.34	46.42		19.9	38.5	39	66.1		21.48	34.55	59.23		22.26	30.75	52.11
	318	CNO		23.94	64.93	70.16		23.31	61.51	65.05		22.9	58.04	60.65	49.38		20.89	54.43	45.07	47.17		20.77	53.65	45.41	50.05		21.1	49.9	44.5	65.1		22.43	44.48	58.52		22.62	40.51	52.92
				Day 0- control				Day 1-control				Day 2- start vehicle (1% glucose H2O)					Day 3- vehicle					Day 4- vehicle					Day 5- end vehicle					Day 6 Control				Day 7 Control
	ID	treatment		Body weight	Food weight	water weight		Body weight	Food weight	water weight		Body weight	Food weight	end water weight	new water weight		Body weight	Food weight	end water weight	new water weight		Body weight	Food weight	end water weight	new water weight		Body weight	Food weight	end water weight	new water weight		Body weight	Food weight	water weight		Body weight	Food weight	water weight
	298	vehicle		24.4	84.85	67.12		23.1	81.56	61.5		23.75	77.28	56.77	51.24		24.2	72.28	45.53	50.69		23.93	68.33	44.2	49.4		23.79	64.34	42.71	60.41		23.95	60.15	55.77		24.03	56.65	51.6
	301	vehicle		22.96	63.79	69.43		22.69	61.99	64.07		23.4	59.34	58.09	52.75		23.06	56.92	46.16	51.42		23.42	54.01	43.72	50.19		23.22	51.59	42.59	65.23		23.59	47.98	60.69		23.29	44.86	56.54
	297	vehicle		23.42	61.9	71.35		23.2	57.84	66.39		23.5	55.45	61.64	54.75		23.8	50.98	48.2	51.66		23.7	46.51	43.95	47.84		23.34	43.38	42.14	62.07		24.06	39.9	56.58		24.36	36	51.25
	300	vehicle		24.02	77.02	70.7		23.6	72.11	65.23		24.21	67.81	59.71	53.32		24.51	62.36	45.5	50.11		23.81	58.19	43.2	47.94		23	53.96	41.4	59.67		23.11	50.25	54.16		23.13	46.22	48.58
	NT2	vehicle		21.42	83.17	72.3		21.18	79.68	66.84		21.54	75.14	60.88	50.01		21.54	71.58	43.24	51.43		21.35	66.66	43.7	48.83		21.17	63.03	42.46	55.78		19.37	60.19	54.68		23.29	54.8	48.99

## Sheet: controls
	Day 0- control				Day 1-control				Day 2- start vehicle treatment (1% glucose)					Day 3 - vehicle					Day 4- vehicle					Day 5- end vehicle					Day 6 control				Day 7 control
ID	Water	Food	BW		Water	Food	BW		Water 1	Water 2	Food	BW		Water 1	Water 2	Food	BW		Water 1	Water 2	Food	BW		Water 1	Water 2	Food	BW		Water	Food	BW		Water	Food	BW
395	75.87	51.92	25.13		69.81	47.29	24.8		64.83	49.2	45.47	24.7		42.8	51.17	41.99	24.72		46.57	48.15	38.91	24.67		44.62	73.47	36.2	24.48		69.78	33.59	24.05		67.2	30.85	24.11
399	76.45	51.37	21.46		70.55	47.97	21.55		65.42	51.74	44.71	22.09		46.01	55.62	40.87	21.25		49.1	51.95	38.18	21.52		46.74	75.51	34.16	21.74		70.81	31.58	21.63		65.57	28.2	21.83
398	73.58	52.42	21.33		66.73	48.42	21.06		60.69	49.24	44.87	21.35		42.98	50.96	40.74	21.32		45.03	50.87	36.91	21.46		45.82	73	33.21	21.2		67.44	29.79	21		61.85	26.19	20.96
397	76.79	50.17	22.62		68.9	46.86	21.86		62.37	51.2	43.13	22.04		43.41	52.69	39.62	22.26		45.4	51.28	35.59	22.41		44.67	75.16	31.92	22.92		68.78	28.51	22.59		62.18	25.61	22.56
401	76.39	51.13	24.22		70.25	46.95	24.23		65.22	49.53	44.37	24.38		43.74	51.69	41.2	23.92		45.75	52.05	38.31	23.98		47.37	76.82	35.32	23.93		72	32.25	23.85		66.95	29.03	24.07
402	75.22	51.04	19.9		67.47	46.85	20.05		61.08	50.55	42.4	20.45		44.58	51.69	38.4	20.85		45.43	50.32	34.45	20.42		45.21	74.04	30.61	20.43		68.87	27.36	20.25		63.51	23.68	20.27
403	75.25	51.33	20.55		67.67	47.03	20.48		61.47	49.79	43.88	20.51		43.58	51.74	40.59	20.13		45.68	51.96	36.66	19.89		46.38	74.39	32.94	20.52		68.54	29.42	20.55		62.42	25.76	20.26
407	75.9	54.26	25.59		70.77	50.28	26.04		65.46	51.5	46.81	25.73		46.07	52.63	42.63	25.7		47.18	52.5	40.53	25.86		48.68	74.49	37.24	25.47		69.72	34.12	25.33		64.86	30.66	25.71
	Day 0- control				Day 1-control				Day 2- start CNO					Day 3- CNO					Day 4- CNO					Day 5- end CNO					Day 6 Control				Day 7 Control
ID	Water	Food	BW		Water	Food	BW		Water 1	Water 2	Food	BW		Water 1	Water 2	Food	BW		Water 1	Water 2	Food	BW		Water 1	Water 2	Food	BW		Water	Food	BW		Water	Food	BW
395	72.19	51.87	24.11		67.85	48.55	24.1		63.14	50.18	45.63	24.65		48.08	49.6	43.67	23.7		45.59	49.53	41.18	23.75		45.46	69.57	37.88	24.12		66.29	34.1	24.63		60.18	30.55	24.23
399	76.53	51.37	21.83		71.92	48.52	21.22		66.82	51.6	44.97	21.37		48.88	51.41	43.14	20.48		48.59	53.18	41.14	20.18		48.22	66.55	37.87	20.61		61.07	33.28	22.06		53.2	28.64	22.39
398	73.44	51.53	20.96		67.35	47.5	21.35		61.29	48.39	43.5	21.74		44.53	49.54	40.89	20.85		45.38	48.59	37.96	20.82		43.92	68.22	34.31	20.94		62.7	28.18	21.19		55.33	26.6	21.16
397	77.4	50.41	22.56		70.74	46.8	22.43		64.05	50.66	42.96	22.6		47.18	50.71	40.98	21.95		45.57	50.94	37.7	21.5		45.66	65.84	34.04	21.85		60.55	29.97	22.32		53.16	26.38	22.25
401	77.18	50.12	24.07		71.83	46.82	24.34		66.94	51.42	43.82	24.26		48.07	51.19	41.78	23.29		46.75	50.78	39.11	23.37		47.67	65.82	36.17	23.17		62.51	32.23	24.32		56.21	28.64	23.97
402	73.93	50.69	20.27		68.01	45.44	20.64		62.28	49.99	42.07	20.51		45.38	49.91	38.72	20.25		44.78	50.26	35.46	20.55		45.62	54.16	31.2	20.48		47.58	26.22	20.85		43.59	22.97	20.22
403	76.14	52.45	20.26		69.4	47.84	20.5		63.41	49.64	44.87	20.32		45.18	49.98	41.66	20.56		44.71	49.45	38.34	20.78		42.79	56.37	34.28	20.73		49.35	29.39	21.35		43.46	25.74	21.18
407	76.7	50.28	25.71		71.48	46.62	25.76		66.65	50.99	44.07	25.25		48.65	52.58	42.33	24.21		48.17	51.57	39.44	24.38		48.67	67.93	36.49	24.02		64.12	32.33	25.26		58.82	28.47	25.54
